# Supplementary material for: An inhaled dose of budesonide induces genes involved in transcription and signaling in the human airways: enhancement of anti‐ and proinflammatory effector genes
Source: PubMed Central journal article supplement — Pharmacol Res Perspect. 2016 Jul 12;4(4):e00243. doi: 10.1002/prp2.243 (PMC5242176; doi:10.1002/prp2.243), 2016-07-12
Supplement: PRP2-4-0243-s001.pdf [file PRP2-4-0243-s001.pdf]

## **Supplemental Data**

An inhaled dose of budesonide induces genes involved in transcription and signaling in the human airways: Enhancement of anti- and pro-inflammatory effector genes

Richard Leigh, Mahmoud M. Mostafa, Elizabeth M. King, Christopher F. Rider, Suharsh Shah, Curtis Dumonceaux, Suzanne L. Traves, Andrew McWhae, Tyler Kolisnik, Cora Kooi, Donna M. Slater, Margaret M. Kelly, Mark Bieda, Anna Miller-Larsson, Robert Newton

## Supplemental Results

**Biopsy microarray analysis.** Following chip scanning the CEL files generated by Affymetrix Expression Console software were analyzed by Partek Genomics Suite (v6.6). Data using  $\geq 2$  fold and  $\leq 0.5$  fold each with  $P \leq 0.05$  provides 109 budesonide up-regulated probe sets and 35 repressed probe sets (Supplemental Table 3). However, the application of a 5% false discovery rate (FDR) reduced this to 72 and 11 probe sets respectively and these are plotted as a heat map (Supplemental Fig. 2). Application of the gene identification tool in DAVID, to remove redundant probes sets, pseudogenes, non-coding RNAs, or other non-gene annotations produced 46 up-regulated and 10 unique down-regulated genes by budesonide. Despite representing the most robustly increased probe sets, the heat map clearly indicates considerable variations between individuals and this, depending on the function of these genes, may have a significant bearing on the profile of responses by each individual to an ICS.

For the extended, lower stringency, gene list there were the 889 probe sets that showed  $\geq 1.25$ -fold ( $P \leq 0.05$ ) budesonide inducibility. Analysis using the DAVID gene ID tools identified 588 up-regulated genes (Supplemental Table 4).

**Comparison of PCR and array data for individual probe sets.** One feature of the microarray analysis, exemplified by FKBP5 and TSC22D3, was the range of fold inducibility shown for the different probe sets corresponding to each individual gene (Supplemental Table 5, Supplemental Fig. 4A). Thus the fold induction for the 6 probe sets corresponding to FKBP5 ranged from 13.41 ( $P \leq 0.001$ ) down to 1.24 fold, which was not considered significant. By comparison, qPCR produced a significant induction of 15.69 fold. While reasons for this difference may be genuine, for example due to alternative mRNA splicing, and are not examined, this outcome has implications for downstream analyses. Of the induced genes tested by qPCR, 18 were induced  $\geq 2$  fold by inhaled budesonide (Supplemental Table 5). However, of these genes, only 14 had probe sets achieving the 2-fold threshold (Supplemental Table 5). This indicates the superior sensitivity of qPCR. Indeed, for the 18 genes with  $\geq 2$  fold inducibility by qPCR, there were a total of 68 probe sets of which 28 achieved  $\geq 2$  fold (Supplemental Table 5). Consequently, comparing the fold induction obtained by qPCR with the average fold for all probes sets for each gene produced a slope of 0.54 ( $r^2 = 0.66$ ) (Supplemental Fig. 4B, left panel), yet using just the probe set with the highest fold induction for each target gene markedly improves the correlation with the qPCR data (slope = 0.77,  $r^2 = 0.96$ ) (Supplemental Fig. 4B, right panel). Thus, consideration of the most highly induced probe set for each target gene, rather than averaging probe set values, provides the most appropriate representation of gene expression change. This approach is therefore taken for all analyses of the microarray data. Secondly, there were many probe sets with less than 2-fold induction, but which based on PCR data reflect real and significant changes in gene expression. Thus, while all 23 genes tested by qPCR showed significantly induced expression by inhaled budesonide, eight genes (CDKN1C, CEBPD, DUSP1, NKBKIA, RGS2, SLC45A1, TLR2 and ZFP36) revealed between 1 and 2 fold inducibility on the microarray with probe sets for SLC45A1 and ZFP36 failing to reach significance (Supplemental Table 5). This clearly confirms that the imposition of the 2 fold, 0.05 FDR criteria excludes much data that are genuine in these biopsy samples. Given the relative ease of later confirmation of genes of interest, an extended gene list based on the 889 probe sets showing  $> 1.25$  inducibility ( $P < 0.05$ ) by budesonide inhalation was generated using the DAVID gene ID conversion tool to produce 588 individual identities (Supplemental Table 4).

## Supplemental Tables

### SUPPLEMENTAL TABLE 1

Gene symbols, names and description of genes analyzed by qPCR

| <b>HGNC Symbol</b> | <b>Common Symbol(s)</b> | <b>Brief description</b>                                                                                                                                                                                                                                                                          |
|--------------------|-------------------------|---------------------------------------------------------------------------------------------------------------------------------------------------------------------------------------------------------------------------------------------------------------------------------------------------|
| ALOX15B            | 15-LOX-2                | Arachidonate 15-lipoxygenase, type B, converts arachidonic acid to 15S-hydroperoxyeicosatetraenoic acid.                                                                                                                                                                                          |
| CD163              | M130, MM130             | Member of the scavenger receptor cysteine-rich superfamily. Found on monocytes and macrophage, CD163 is an acute phase factor involved in the clearance of haemoglobin/haptoglobin. May help protect from free-haemoglobine-mediated oxidated damage. CD163 may be an innate sensor for bacteria. |
| CEBPD              | C/EBP $\delta$          | CCAAT/enhancer binding protein $\delta$ is a bZIP transcription factor that is involved in the regulation of immune and inflammatory responses.                                                                                                                                                   |
| CDKN1C             | p57KIP2                 | Cyclin-dependent kinase inhibitor 1C inhibits G1 cyclin/Cdk complexes to negatively regulate cell cycle. Reported to interact with and inhibit JNK MAPKs (10, 11).                                                                                                                                |
| CNR1               | CB1, CNR                | Cannabinoid receptor 1 is a GPCR that inhibits adenylyl cyclase activity.                                                                                                                                                                                                                         |
| CXCR4              | LAP3, LCR1              | Chemokine (C-X-C motif) receptor 4 is a GPCR receptor for stromal cell-derived factor 1 (SDF1) (CXCL12)                                                                                                                                                                                           |
| DUSP1              | MKP1                    | Dual-specificity phosphatase 1 / mitogen-activated protein kinase phosphatas 1 is up-regulated by inflammatory pathways and by glucocorticoids to dephosphorylate and, thereby inactivate, MAPK family members including ERK, p38 MAPK and JNK (12, 13).                                          |
| FAM150B            | PRO1097                 | Function unknown.                                                                                                                                                                                                                                                                                 |
| FKBP5              | FKBP51                  | FK506 binding protein 5 is an immunophilin that interacts with the cytoplasmic Hsp90/nuclear hormone receptor complex to negatively regulate GR function (14-16).                                                                                                                                 |
| IGF1               | MGF                     | Insulin-like growth factor 1 (somatomedin C) is similar to insulin in function and mediates growth and development.                                                                                                                                                                               |
| KLF9               | BTEB                    | Krupple-like factor 9 is a GC box transcription factor.                                                                                                                                                                                                                                           |
| LIFR               | CD118                   | Leukemia inhibitor factor receptor alpha is a type I cytokine receptor that binds to gp130 to form a functional receptor complex. Mediates differentiation, proliferation and survival.                                                                                                           |
| NFKBIA             | I $\kappa$ B $\alpha$   | NF $\kappa$ B inhibitor alpha is an endogenous cytoplasmic inhibitor of the inflammatory transcription factor NF- $\kappa$ B.                                                                                                                                                                     |
| PDK4               |                         | Pyruvate dehydrogenase kinase, isozyme 4. Involved in the regulation of glucose metabolism.                                                                                                                                                                                                       |
| PER1               | PER, RIGUI              | Member of the Period family of genes. A transcription factor that is regulated in a circadian manner.                                                                                                                                                                                             |
| RGS1               | 1R20, BL34              | Regulator of G-protein signaling (RGS) 1 is a GTPase-activating protein (GAP) for the G $\alpha$ subunit of heterotrimeric G proteins. It is a G $_{i/o}\alpha$ -selective RGS that plays roles in regulating responses to chemokines (17, 18).                                                   |
| RGS2               | RGS2                    | Regulator or G-protein signaling 2 is a GTPase-activating protein (GAP) for the G $\alpha$ subunit of heterotrimeric G proteins. RSG2 is selective for Gq $\alpha$ and attenuates signaling by bronchodilator stimuli, including histamine, methacholine and U46619 (19, 20).                     |
| SLC45A1            | DNB5                    | Solute carrier 45A1 is an integral membrane symporter categorized as a proton-associated sugar transporter that may show glucose transporter activity.                                                                                                                                            |

|         |            |                                                                                                                                                                                                                                     |
|---------|------------|-------------------------------------------------------------------------------------------------------------------------------------------------------------------------------------------------------------------------------------|
| TFCP2L1 | LBP9       | Transcription factor CP2-like 1.                                                                                                                                                                                                    |
| TLR2    | TIL4, CD82 | Toll-like receptor 2 plays a role in pathogen recognition and activation of innate immunity.                                                                                                                                        |
| TSC22D3 | GILZ       | TSC22D3 is a leucine zipper protein believed to be a transcriptional regulator that negatively regulates inflammatory signaling to reduce NF- $\kappa$ B- and AP-1-dependent transcription (21, 22) (23, 24).                       |
| ZBTB16  | PLZF       | Zinc finger and BTB domain containing 16 is a transcription factor that interacts with HDACs and may play roles in transcriptional repression.                                                                                      |
| ZFP36   | TTP        | Zinc finger protein 36 / tristetraprolin is a RNA binding protein which regulates the mRNA decay of mRNAs via AUUUA motifs. Expression is up-regulated by inflammatory stimuli, such as IL1B, to provide feedback control (25, 26). |

---

Information was taken from NCBI Gene and supplemented with the indicated references.

SUPPLEMENTAL TABLE 2

Clinical characteristics of study participants

| Study ID # | Age | Gender | FVC Actual (l) | FEV <sub>1</sub> Actual (l) | FEV <sub>1</sub> % Pred | FEV <sub>1</sub> /FVC | Skin Test | Smoking History | MCh PC <sub>20</sub> |
|------------|-----|--------|----------------|-----------------------------|-------------------------|-----------------------|-----------|-----------------|----------------------|
| 01         | 40  | M      | 5.96           | 4.77                        | 113.0                   | 0.80                  | negative  | Non smoker      | >16                  |
| 02         | 34  | M      | 6.43           | 4.84                        | 107.3                   | 0.75                  | negative  | Non smoker      | >16                  |
| 03         | 27  | M      | 6.22           | 4.53                        | 95.8                    | 0.73                  | negative  | Non smoker      | >16                  |
| 04         | 28  | M      | 5.56           | 4.65                        | 100.0                   | 0.84                  | negative  | Non smoker      | >16                  |
| 05         | 49  | M      | 5.85           | 4.28                        | 101.9                   | 0.73                  | negative  | Non smoker      | >16                  |
| 06         | 38  | M      | 6.00           | 5.26                        | 122.9                   | 0.88                  | negative  | Non smoker      | >16                  |
| 07         | 27  | M      | 5.43           | 4.41                        | 91.7                    | 0.81                  | negative  | Non smoker      | >16                  |
| 08         | 32  | M      | 5.08           | 3.8                         | 89.4                    | 0.75                  | negative  | Non smoker      | >16                  |
| 09         | 22  | M      | 3.57           | 3.11                        | 89.1                    | 0.87                  | negative  | Non smoker      | >16                  |
| 10         | 26  | M      | 4.68           | 3.72                        | 83.6                    | 0.79                  | negative  | Non smoker      | >16                  |
| 11         | 24  | M      | 6.87           | 5.91                        | 105.0                   | 0.86                  | negative  | Non smoker      | >16                  |
| 12         | 30  | M      | 6.48           | 4.9                         | 105.8                   | 0.76                  | negative  | Non smoker      | >16                  |

FVC: Forced Vital Capacity; FEV<sub>1</sub>: Forced Expiratory Volume in 1 second; MCh PC<sub>20</sub>: Provocative Concentration (mg/ml) of methacholine causing a 20% fall in FEV<sub>1</sub>.; Pred, predicted

SUPPLEMENTAL TABLE 3

Biopsy microarray data: Probe sets showing  $\geq 2$  fold, or  $\leq 0.5$  fold change ( $P \leq 0.05$ ) following budesonide inhalation

| Probe set ID  | Entrez Gene | Gene Symbol | Gene Title                                                | P-value (Bud/Plac) | Fold (Bud/Plac) |
|---------------|-------------|-------------|-----------------------------------------------------------|--------------------|-----------------|
| 11743917_a_at | 2289        | FKBP5       | FK506 binding protein 5                                   | 2.0E-13            | 13.41           |
| 11729371_a_at | 7704        | ZBTB16      | zinc finger and BTB domain containing 16                  | 1.7E-14            | 12.75           |
| 11739567_s_at | 2289        | FKBP5       | FK506 binding protein 5                                   | 3.5E-17            | 12.47           |
| 11739565_a_at | 2289        | FKBP5       | FK506 binding protein 5                                   | 1.2E-11            | 11.18           |
| 11726088_s_at | 116154      | PHACTR3     | phosphatase and actin regulator 3                         | 2.2E-09            | 8.38            |
| 11748099_a_at | 116154      | PHACTR3     | phosphatase and actin regulator 3                         | 5.5E-09            | 7.91            |
| 11728679_a_at | 9332        | CD163       | CD163 molecule                                            | 4.4E-09            | 6.89            |
| 11746275_a_at | 2289        | FKBP5       | FK506 binding protein 5                                   | 2.8E-08            | 6.52            |
| 11729445_at   | 285016      | FAM150B     | family with sequence similarity 150, member B             | 5.5E-07            | 5.89            |
| 11720161_at   | 10563       | CXCL13      | chemokine (C-X-C motif) ligand 13                         | 7.0E-03            | 4.39            |
| 11717829_s_at | 1831        | TSC22D3     | TSC22 domain family, member 3                             | 1.0E-12            | 4.06            |
| 11739566_a_at | 2289        | FKBP5       | FK506 binding protein 5                                   | 2.8E-06            | 3.94            |
| 11751415_a_at | 1831        | TSC22D3     | TSC22 domain family, member 3                             | 2.9E-07            | 3.83            |
| 11716974_a_at | 5166        | PDK4        | pyruvate dehydrogenase kinase, isozyme 4                  | 9.9E-12            | 3.62            |
| 11731461_x_at | 1368        | CPM         | carboxypeptidase M                                        | 4.0E-06            | 3.60            |
| 11717168_a_at | 5187        | PER1        | period circadian clock 1                                  | 1.3E-08            | 3.48            |
| 11717327_at   | 687         | KLF9        | Kruppel-like factor 9                                     | 2.7E-08            | 3.33            |
| 11721033_a_at | 11170       | FAM107A     | family with sequence similarity 107, member A             | 2.3E-08            | 3.23            |
| 11756473_a_at | 10659       | CELF2       | CUGBP, Elav-like family member 2                          | 1.1E-09            | 3.16            |
| 11745144_a_at | 26253       | CLEC4E      | C-type lectin domain family 4, member E                   | 7.3E-06            | 3.16            |
| 11731460_at   | 1368        | CPM         | carboxypeptidase M                                        | 1.8E-07            | 3.15            |
| 11721032_s_at | 11170       | FAM107A     | family with sequence similarity 107, member A             | 1.6E-08            | 3.12            |
| 11723464_s_at | 10659       | CELF2       | CUGBP, Elav-like family member 2                          | 7.2E-08            | 3.11            |
| 11728190_s_at | 7852        | CXCR4       | chemokine (C-X-C motif) receptor 4                        | 2.4E-04            | 3.10            |
| 11717326_at   | 687         | KLF9        | Kruppel-like factor 9                                     | 1.3E-09            | 3.08            |
| 11732871_a_at | 158062      | LCN6        | lipocalin 6                                               | 5.7E-05            | 3.01            |
| 11730310_at   | 29842       | TFCP2L1     | transcription factor CP2-like 1                           | 5.2E-07            | 3.00            |
| 11733262_a_at | 10659       | CELF2       | CUGBP, Elav-like family member 2                          | 1.1E-04            | 2.95            |
| 11729817_a_at | 3479        | IGF1        | insulin-like growth factor 1 (somatomedin C)              | 1.9E-05            | 2.91            |
| 11720162_at   | 10563       | CXCL13      | chemokine (C-X-C motif) ligand 13                         | 1.6E-02            | 2.81            |
| 11717830_a_at | 1831        | TSC22D3     | TSC22 domain family, member 3                             | 2.5E-03            | 2.77            |
| 11725722_at   | 29028       | ATAD2       | ATPase family, AAA domain containing 2                    | 4.6E-09            | 2.75            |
| 11724157_x_at | 6783        | SULT1E1     | sulfotransferase family 1E, estrogen-preferring, member 1 | 1.0E-03            | 2.73            |
| 11727015_s_at | 5069        | PAPPA       | pregnancy-associated plasma protein A, pappalysin 1       | 1.7E-05            | 2.71            |
| 11758664_s_at | 22836       | RHOBTB3     | Rho-related BTB domain containing 3                       | 2.8E-05            | 2.71            |
| 11726210_at   | 28999       | KLF15       | Kruppel-like factor 15                                    | 5.1E-09            | 2.70            |
| 11722675_at   | 64344       | HIF3A       | hypoxia inducible factor 3, alpha subunit                 | 9.6E-08            | 2.69            |
| 11751273_a_at | 2857        | GPR34       | G protein-coupled receptor 34                             | 7.0E-05            | 2.68            |
| 11724156_at   | 6783        | SULT1E1     | sulfotransferase family 1E, estrogen-preferring, member 1 | 7.7E-04            | 2.68            |
| 11726375_x_at | 2857        | GPR34       | G protein-coupled receptor 34                             | 8.2E-05            | 2.66            |
| 11728191_x_at | 7852        | CXCR4       | chemokine (C-X-C motif) receptor 4                        | 1.2E-03            | 2.66            |
| 11729818_s_at | 3479        | IGF1        | insulin-like growth factor 1 (somatomedin C)              | 1.9E-04            | 2.65            |
| 11724155_at   | 6783        | SULT1E1     | sulfotransferase family 1E, estrogen-preferring, member 1 | 2.2E-03            | 2.64            |
| 11740522_a_at | 7173        | TPO         | thyroid peroxidase                                        | 2.2E-04            | 2.63            |
| 11727715_at   | 8515        | ITGA10      | integrin, alpha 10                                        | 5.3E-05            | 2.59            |
| 11723465_a_at | 10659       | CELF2       | CUGBP, Elav-like family member 2                          | 1.7E-09            | 2.58            |
| 11728189_a_at | 7852        | CXCR4       | chemokine (C-X-C motif) receptor 4                        | 3.1E-03            | 2.57            |
| 11742193_a_at | 1268        | CNR1        | cannabinoid receptor 1 (brain)                            | 8.0E-05            | 2.55            |
| 11728397_at   | 4499        | MT1M        | metallothionein 1M                                        | 2.1E-07            | 2.50            |
| 11756888_a_at | 29842       | TFCP2L1     | transcription factor CP2-like 1                           | 3.1E-07            | 2.45            |

|               |                          |                    |                                                                                         |         |      |
|---------------|--------------------------|--------------------|-----------------------------------------------------------------------------------------|---------|------|
| 11724154_a_at | 6783                     | SULT1E1            | sulfotransferase family 1E, estrogen-preferring, member 1                               | 1.6E-02 | 2.43 |
| 11730342_x_at | 84174                    | SLA2               | Src-like-adaptor 2                                                                      | 5.0E-04 | 2.41 |
| 11721388_a_at | 5026                     | P2RX5              | purinergic receptor P2X, ligand-gated ion channel, 5                                    | 1.6E-03 | 2.41 |
| 11725912_a_at | 2066                     | ERBB4              | v-erb-a erythroblastic leukemia viral oncogene homolog 4 (avian)                        | 5.5E-04 | 2.39 |
| 11728571_a_at | 5334                     | PLCL1              | phospholipase C-like 1                                                                  | 7.9E-04 | 2.39 |
| 11744436_a_at | 11113 /<br>1003022<br>74 | CIT ///<br>MIR1178 | citron (rho-interacting, serine/threonine kinase 21) /// microRNA 1178                  | 7.8E-05 | 2.39 |
| 11733628_at   | 642938                   | FAM196A            | family with sequence similarity 196, member A                                           | 7.3E-04 | 2.38 |
| 11761173_at   | 64344                    | HIF3A              | hypoxia inducible factor 3, alpha subunit                                               | 5.7E-06 | 2.38 |
| 11761174_x_at | 64344                    | HIF3A              | hypoxia inducible factor 3, alpha subunit                                               | 5.7E-06 | 2.38 |
| 11758145_s_at | 3977                     | LIFR               | leukemia inhibitory factor receptor alpha                                               | 1.2E-04 | 2.37 |
| 11751570_a_at | 51338                    | MS4A4A             | membrane-spanning 4-domains, subfamily A, member 4A                                     | 2.4E-05 | 2.37 |
| 11731464_at   | 1368                     | CPM                | carboxypeptidase M                                                                      | 1.1E-07 | 2.37 |
| 11742035_a_at | 5334                     | PLCL1              | phospholipase C-like 1                                                                  | 9.3E-04 | 2.35 |
| 11734619_x_at | 247                      | ALOX15B            | arachidonate 15-lipoxygenase, type B                                                    | 2.7E-06 | 2.34 |
| 11727016_s_at | 5069                     | PAPPA              | pregnancy-associated plasma protein A, pappalysin 1                                     | 1.8E-05 | 2.34 |
| 11724954_s_at | 4360                     | MRC1               | mannose receptor, C type 1                                                              | 4.7E-04 | 2.33 |
| 11728398_x_at | 4499                     | MT1M               | metallothionein 1M                                                                      | 3.3E-07 | 2.31 |
| 11726079_x_at | 117248                   | GALNT15            | UDP-N-acetyl-alpha-D-galactosamine:polypeptide N-acetylgalactosaminyltransferase 15     | 4.6E-04 | 2.30 |
| 11744843_s_at | 5069                     | PAPPA              | pregnancy-associated plasma protein A, pappalysin 1                                     | 5.3E-06 | 2.28 |
| 11739094_a_at | 7852                     | CXCR4              | chemokine (C-X-C motif) receptor 4                                                      | 4.5E-03 | 2.27 |
| 11723030_at   | 83716                    | CRISPLD2           | cysteine-rich secretory protein LCCL domain containing 2                                | 9.9E-05 | 2.26 |
| 11726131_a_at | 5318                     | PKP2               | plakophilin 2                                                                           | 4.7E-06 | 2.26 |
| 11720202_at   | 2766                     | GMPT               | guanosine monophosphate reductase                                                       | 2.0E-05 | 2.26 |
| 11756885_a_at | 29028                    | ATAD2              | ATPase family, AAA domain containing 2                                                  | 2.4E-08 | 2.25 |
| 11720749_a_at | 11185                    | INMT               | indolethylamine N-methyltransferase                                                     | 1.4E-03 | 2.25 |
| 11732699_a_at | 5570                     | PKIB               | protein kinase (cAMP-dependent, catalytic) inhibitor beta                               | 2.0E-03 | 2.24 |
| 11733017_a_at | 5295                     | PIK3R1             | phosphoinositide-3-kinase, regulatory subunit 1 (alpha)                                 | 1.5E-06 | 2.24 |
| 11715659_s_at | 54206                    | ERRFI1             | ERBB receptor feedback inhibitor 1                                                      | 6.3E-11 | 2.23 |
| 11729831_a_at | 9073                     | CLDN8              | claudin 8                                                                               | 9.6E-04 | 2.22 |
| 11723862_at   | 6529                     | SLC6A1             | solute carrier family 6 (neurotransmitter transporter, GABA), member 1                  | 3.9E-03 | 2.21 |
| 11754631_x_at | 5295                     | PIK3R1             | phosphoinositide-3-kinase, regulatory subunit 1 (alpha)                                 | 4.4E-06 | 2.21 |
| 11726080_a_at | 117248                   | GALNT15            | UDP-N-acetyl-alpha-D-galactosamine:polypeptide N-acetylgalactosaminyltransferase 15     | 3.0E-03 | 2.19 |
| 11733187_a_at | 3575                     | IL7R               | interleukin 7 receptor                                                                  | 2.3E-04 | 2.19 |
| 11725071_at   | 79960                    | JADE1              | Jade family PDH finger 1                                                                | 1.6E-07 | 2.19 |
| 11757645_s_at | 387758                   | FIBIN              | fin bud initiation factor homolog (zebrafish)                                           | 4.1E-03 | 2.18 |
| 11742765_at   | 5996                     | RGS1               | regulator of G-protein signaling 1                                                      | 5.5E-03 | 2.17 |
| 11720339_at   | 387758                   | FIBIN              | fin bud initiation factor homolog (zebrafish)                                           | 8.2E-04 | 2.17 |
| 11720300_a_at | 6503                     | SLA                | Src-like-adaptor                                                                        | 3.6E-04 | 2.17 |
| 11729832_s_at | 9073                     | CLDN8              | claudin 8                                                                               | 8.3E-04 | 2.16 |
| 11758120_s_at | 3745                     | KCNB1              | potassium voltage-gated channel, Shab-related subfamily, member 1                       | 3.1E-04 | 2.16 |
| 11725072_at   | 79960                    | JADE1              | Jade family PDH finger 1                                                                | 2.0E-07 | 2.15 |
| 11732700_x_at | 5570                     | PKIB               | protein kinase (cAMP-dependent, catalytic) inhibitor beta                               | 2.1E-03 | 2.13 |
| 11722615_s_at | 8843 ///<br>338442       | HCAR2 /<br>HCAR3   | hydroxycarboxylic acid receptor 2 / hydroxycarboxylic acid receptor 3                   | 2.2E-07 | 2.12 |
| 11745893_s_at | 10797                    | MTHFD2             | methylenetetrahydrofolate dehydrogenase (NADP+ dependent) 2, methenyltetrahydrofolate c | 1.1E-04 | 2.10 |
| 11728769_at   | 256435                   | ST6GALN<br>AC3     | ST6 (alpha-N-acetyl-neuraminyl-2,3-beta-galactosyl-1,3)-N-acetylgalactosaminide alpha-2 | 1.8E-03 | 2.08 |
| 11732588_at   | 3745                     | KCNB1              | potassium voltage-gated channel, Shab-related subfamily, member 1                       | 6.1E-04 | 2.08 |
| 11716455_at   | 22836                    | RHOBTB3            | Rho-related BTB domain containing 3                                                     | 9.4E-08 | 2.08 |
| 11725073_s_at | 79960                    | PHF17              | PHD finger protein 17                                                                   | 2.0E-09 | 2.07 |
| 11716457_x_at | 22836                    | RHOBTB3            | Rho-related BTB domain containing 3                                                     | 1.0E-04 | 2.06 |

|               |                                        |                                                    |                                                                                            |         |      |
|---------------|----------------------------------------|----------------------------------------------------|--------------------------------------------------------------------------------------------|---------|------|
| 11726823_at   | 140                                    | ADORA3                                             | adenosine A3 receptor                                                                      | 8.1E-06 | 2.06 |
| 11717413_a_at | 55062                                  | WIPI1                                              | WD repeat domain, phosphoinositide interacting 1                                           | 6.8E-09 | 2.06 |
| 11731112_at   | 27232                                  | GNMT                                               | glycine N-methyltransferase                                                                | 1.6E-03 | 2.05 |
| 11753736_s_at | 4498 /<br>4499 /<br>140851             | MT1JP /<br>MT1M /<br>MT1P3                         | metallothionein 1J, pseudogene / metallothionein 1M /<br>metallothionein 1 pseudogene      | 9.3E-06 | 2.03 |
| 11728653_at   | 3488                                   | IGFBP5                                             | insulin-like growth factor binding protein 5                                               | 6.8E-04 | 2.03 |
| 11727014_at   | 5069                                   | PAPPA                                              | pregnancy-associated plasma protein A, pappalysin 1                                        | 2.5E-03 | 2.03 |
| 11729444_a_at | 6820                                   | SULT2B1                                            | sulfotransferase family, cytosolic, 2B, member 1                                           | 5.0E-06 | 2.02 |
| 11751905_a_at | 4811                                   | NID1                                               | nidogen 1                                                                                  | 2.8E-03 | 2.01 |
| 11755663_s_at | 2309 /<br>2310                         | FOXO3 /<br>FOXO3B                                  | forkhead box O3 / forkhead box O3B pseudogene                                              | 1.4E-03 | 2.01 |
| 11731762_s_at | 6196                                   | RPS6KA2                                            | ribosomal protein S6 kinase, 90kDa, polypeptide 2                                          | 1.6E-09 | 2.00 |
| 11755742_a_at | 131                                    | ADH7                                               | alcohol dehydrogenase 7 (class IV), mu or sigma polypeptide                                | 2.0E-02 | 0.50 |
| 11731903_at   | 50489                                  | CD207                                              | CD207 molecule, langerin                                                                   | 1.2E-06 | 0.50 |
| 11728771_a_at | 22802                                  | CLCA4                                              | chloride channel accessory 4                                                               | 1.8E-02 | 0.49 |
| 11723418_a_at | 7447                                   | VSNL1                                              | visinin-like 1                                                                             | 2.2E-03 | 0.49 |
| 11749996_a_at | 7447                                   | VSNL1                                              | visinin-like 1                                                                             | 2.6E-03 | 0.49 |
| 11742867_at   | 1004                                   | CDH6                                               | cadherin 6, type 2, K-cadherin (fetal kidney)                                              | 3.7E-03 | 0.49 |
| 11718743_a_at | 6387                                   | CXCL12                                             | chemokine (C-X-C motif) ligand 12                                                          | 1.1E-04 | 0.48 |
| 11719754_s_at | 3557                                   | IL1RN                                              | interleukin 1 receptor antagonist                                                          | 3.6E-02 | 0.48 |
| 11716523_at   | 6280                                   | S100A9                                             | S100 calcium binding protein A9                                                            | 2.1E-02 | 0.48 |
| 11757583_s_at | 9865                                   | TRIL                                               | TLR4 interactor with leucine-rich repeats                                                  | 2.2E-05 | 0.48 |
| 11753131_x_at | 4071                                   | TM4SF1                                             | transmembrane 4 L six family member 1                                                      | 4.5E-04 | 0.47 |
| 11753129_a_at | 4071                                   | TM4SF1                                             | transmembrane 4 L six family member 1                                                      | 3.0E-04 | 0.46 |
| 11753130_at   | 4071                                   | TM4SF1                                             | transmembrane 4 L six family member 1                                                      | 3.4E-04 | 0.46 |
| 11754410_s_at | 187                                    | APLNR                                              | apelin receptor                                                                            | 1.3E-03 | 0.46 |
| 11719899_at   | 387763                                 | C11orf96                                           | chromosome 11 open reading frame 96                                                        | 1.4E-02 | 0.43 |
| 11723048_at   | 1524                                   | CX3CR1                                             | chemokine (C-X3-C motif) receptor 1                                                        | 8.2E-04 | 0.43 |
| 11757425_s_at | 7412                                   | VCAM1                                              | vascular cell adhesion molecule 1                                                          | 4.6E-03 | 0.43 |
| 11725905_a_at | 1903                                   | S1PR3                                              | sphingosine-1-phosphate receptor 3                                                         | 3.2E-02 | 0.43 |
| 11731776_at   | 6356                                   | CCL11                                              | chemokine (C-C motif) ligand 11                                                            | 3.3E-03 | 0.43 |
| 11719675_a_at | 7412                                   | VCAM1                                              | vascular cell adhesion molecule 1                                                          | 5.3E-04 | 0.43 |
| 11730319_at   | 4982                                   | TNFRSF11<br>B                                      | tumor necrosis factor receptor superfamily, member 11b                                     | 5.8E-05 | 0.43 |
| 11749997_x_at | 7447                                   | VSNL1                                              | visinin-like 1                                                                             | 5.3E-03 | 0.43 |
| 11732901_a_at | 9582 /<br>200315<br>/<br>1009131<br>87 | APOBEC3<br>A /<br>APOBEC3<br>A_B /<br>APOBEC3<br>B | apolipoprotein B mRNA editing enzyme, catalytic polypeptide-like<br>3A /// APOBEC3A and AP | 2.5E-02 | 0.42 |
| 11728532_at   | 2205                                   | FCER1A                                             | Fc fragment of IgE, high affinity I, receptor for; alpha polypeptide                       | 7.8E-05 | 0.42 |
| 11751426_a_at | 90865                                  | IL33                                               | interleukin 33                                                                             | 1.8E-02 | 0.41 |
| 11732902_x_at | 9582                                   | APOBEC3<br>B                                       | apolipoprotein B mRNA editing enzyme, catalytic polypeptide-like<br>3B                     | 2.2E-02 | 0.41 |
| 11743350_a_at | 84419                                  | C15orf48                                           | chromosome 15 open reading frame 48                                                        | 3.7E-02 | 0.40 |
| 11722792_a_at | 187                                    | APLNR                                              | apelin receptor                                                                            | 3.3E-04 | 0.38 |
| 11729296_s_at | 4322                                   | MMP13                                              | matrix metalloproteinase 13 (collagenase 3)                                                | 2.1E-04 | 0.38 |
| 11725584_at   | 3038                                   | HAS3                                               | hyaluronan synthase 3                                                                      | 2.1E-04 | 0.36 |
| 11720298_at   | 3627                                   | CXCL10                                             | chemokine (C-X-C motif) ligand 10                                                          | 8.4E-03 | 0.35 |
| 11727906_at   | 4319                                   | MMP10                                              | matrix metalloproteinase 10 (stromelysin 2)                                                | 6.4E-05 | 0.34 |
| 11726316_at   | 6401                                   | SELE                                               | selectin E                                                                                 | 2.5E-04 | 0.34 |
| 11729297_at   | 4322                                   | MMP13                                              | matrix metalloproteinase 13 (collagenase 3)                                                | 5.5E-05 | 0.28 |
| 11716384_at   | 6347                                   | CCL2                                               | chemokine (C-C motif) ligand 2                                                             | 1.8E-05 | 0.27 |



RNA was prepared from biopsy samples taken 5-6h after placebo (Plac) or budesonide (1600 $\mu$ g) (Bud) inhalation. Total RNA was subjected to expression profiling using Affymetrix PrimeView microarrays. Analysis (n = 11 individuals) was performed with Partek Genomics Suite (Version 6.6) using robust multi-array averaging (RMA). Resultant fold expression and *P* values for all probe sets showing fold change  $\geq 2$  or  $\leq 0.5$  with  $P \leq 0.05$  are listed.

SUPPLEMENTAL TABLE 4

Biopsy microarray data – Induced genes: Genes corresponding to probes sets showing  $\geq 1.25$  fold ( $P \leq 0.05$ ) with inhaled budesonide are collected into functional groups

| Fold                                                  | Gene symbols                                                                                                                                                                                                                        |
|-------------------------------------------------------|-------------------------------------------------------------------------------------------------------------------------------------------------------------------------------------------------------------------------------------|
| <b>1. Transcriptional control</b>                     |                                                                                                                                                                                                                                     |
| <i>Positive regulator - DNA binding</i>               |                                                                                                                                                                                                                                     |
| $\geq 2$                                              | FOXO3, HIF3A, <u>KLF9</u> , KLF15, <u>PER1</u> , <u>TFCP2L1</u>                                                                                                                                                                     |
| $<2/\geq 1.5$                                         | AFF3, ASCL3, <u>CEBPD</u> , FHL5, FOSL2, FOXO1, IKZF1, KLF7, KLF13, PPARGC1A, TCF21, TFEB, TOX, TOX2                                                                                                                                |
| $<1.5/\geq 1.25$                                      | ARNTL, ATF5, ATOH8, CAMTA1, CSRNPI, FOXN2, GLIS3, HAND2, IRX3, KLF2, KLF6, LMO2, MAFB, MYEF2, NFIA, NFIB, NFIC, NR2E3, PBX4, RORA, RUNX2, SCML4, SNAPC3, STOX1, TBX21, THRA, ZNF234, ZNF275, ZNF320, ZNF561, ZNF682, ZNF763, ZNF844 |
| <i>Negative regulator – DNA binding</i>               |                                                                                                                                                                                                                                     |
| $\geq 2$                                              | <u>TSC22D3</u> , <u>ZBTB16</u>                                                                                                                                                                                                      |
| $<2/\geq 1.5$                                         | ANKRA2, BATF, CREBRF, NFIL3, SPEN, ZBTB8A, ZBTB20, ZFHX3, ZNF652                                                                                                                                                                    |
| $<1.5/\geq 1.25$                                      | BCL6, CRY2, GZF1, KLHL24, ZBTB38, ZHX3, ZMYND8, ZNF57, ZNF157, ZNF331, ZNF540                                                                                                                                                       |
| <i>Other regulator</i>                                |                                                                                                                                                                                                                                     |
| $\geq 2$                                              | ATAD2, JADE1                                                                                                                                                                                                                        |
| $<2/\geq 1.5$                                         | POU2AF1                                                                                                                                                                                                                             |
| $<1.5/\geq 1.25$                                      | ATRX, ATXN7, CITED2, EID3, FAM120B, GREB1, HMGB2, NAP1L1, PHF8, PIAS1, SMARCD2, TOX3, TTF1, VGLL3                                                                                                                                   |
| <b>2. Membrane receptors</b>                          |                                                                                                                                                                                                                                     |
| <i>GPCRs</i>                                          |                                                                                                                                                                                                                                     |
| $\geq 2$                                              | ADORA3, <u>CNR1</u> , <u>CXCR4</u> , GPR34, HCAR2/HCAR3                                                                                                                                                                             |
| $<2/\geq 1.5$                                         | ADCYAP1R1, C3AR1, F2R, GPR133                                                                                                                                                                                                       |
| $<1.5/\geq 1.25$                                      | ADRA2C, CMKLR1, FZD7, NMUR2, NPY2R, OR7A5                                                                                                                                                                                           |
| <i>Cytokine, growth factor, and related receptors</i> |                                                                                                                                                                                                                                     |
| $\geq 2$                                              | IL7R, <u>LIFR</u>                                                                                                                                                                                                                   |
| $<2/\geq 1.5$                                         | FLT3, IL6R, PDGFRA                                                                                                                                                                                                                  |
| $<1.5/\geq 1.25$                                      | CSF1R, CSF2RA, GFRA1, IL1R1, IL6ST, INSR, NTRK3, TGFBR3, <u>TLR2</u>                                                                                                                                                                |
| <i>Other membrane receptors</i>                       |                                                                                                                                                                                                                                     |
| $\geq 2$                                              | <u>CD163</u> , CLEC4E, ITGA10, MRC1, MS4A4A                                                                                                                                                                                         |
| $<2/\geq 1.5$                                         | CD53, FCGR2B, FCRL5, GPIHBP1, KLRD1, MERTK, MSR1                                                                                                                                                                                    |
| $<1.5/\geq 1.25$                                      | CD84, CD86, CD160, CD302, F3, HAVCR2, ITGA5, ITGB1, LAIR1, LDLRAD3, LILRA6, LILRB3, LY9, MS4A7, NKTR, OGFRL1, RTN4RL1, SIGLEC10, SLAMF6, ROR1, VSIG4                                                                                |
| <b>3. Signaling and regulation of signaling</b>       |                                                                                                                                                                                                                                     |
| <i>Kinase</i>                                         |                                                                                                                                                                                                                                     |
| $\geq 2$                                              | CIT, ERBB4, RPS6KA2                                                                                                                                                                                                                 |
| $<2/\geq 1.5$                                         | BLK, CAMK2B, DGKG, IRAK3, PAK3, PTK2B, RPS6KA5, SIK1, TAOK1                                                                                                                                                                         |
| $<1.5/\geq 1.25$                                      | AKT3, DAPK1, FGR, HIPK2, LATS2, MAP3K6, MKNK2, NIM1K, PRKCA, SGK1, TXK, UHMK1, WNK1, ZAK                                                                                                                                            |
| <i>Phosphatase</i>                                    |                                                                                                                                                                                                                                     |
| $\geq 2$                                              | PHACTR3                                                                                                                                                                                                                             |
| $<2/\geq 1.5$                                         | <u>DUSP1</u> , PTPN5                                                                                                                                                                                                                |
| $1.5 > 1.25$                                          | PPM1B, PPM1K, PTPDC1, PTPRG, PTPRM, TENC1                                                                                                                                                                                           |
| <i>GTPase, GEF and GAP</i>                            |                                                                                                                                                                                                                                     |
| $\geq 2$                                              | ERRFI1, RGS1, RHOBTB3                                                                                                                                                                                                               |
| $<2/\geq 1.5$                                         | ARHGAP10, FGD4, RAPGEF3, RHOU, SMAP2,                                                                                                                                                                                               |
| $<1.5/\geq 1.25$                                      | ARHGAP6, ARHGAP19, ARHGAP26, ARHGEF10, ARL4A, DENND3, DENND6A, DOCK5, FAM13A, GIMAP1, IQGAP2, RAB3IP, RAB8B, RAB31, RAB40A, RHOB, <u>RGS2</u> , RRAGD, SRGAP1, SRGAP2, TBC1D2B, TRIO                                                |
| <i>Secreted factors (cytokines, growth factors)</i>   |                                                                                                                                                                                                                                     |
| $\geq 2$                                              | CXCL13, <u>IGF1</u>                                                                                                                                                                                                                 |
| $<2/\geq 1.5$                                         | CTGF, INHBA, TNFSF4, SAA1                                                                                                                                                                                                           |

|                                    |                                                                                                                                                                                                                                                                                                                                                                                                                                                                                                                                                                                                                                                                              |
|------------------------------------|------------------------------------------------------------------------------------------------------------------------------------------------------------------------------------------------------------------------------------------------------------------------------------------------------------------------------------------------------------------------------------------------------------------------------------------------------------------------------------------------------------------------------------------------------------------------------------------------------------------------------------------------------------------------------|
| <1.5/≥1.25                         | BMP2, EBI3, IL16, NRTN                                                                                                                                                                                                                                                                                                                                                                                                                                                                                                                                                                                                                                                       |
| <b>Other signaling</b>             |                                                                                                                                                                                                                                                                                                                                                                                                                                                                                                                                                                                                                                                                              |
| ≥2                                 | CCND3, CELF2, CRISPLD2, FAM107A, KCNB1, <u>FKBP5</u> , IGFBP5, P2RX5, PIK3R1, PKIB, PKP2, PLCL1, SLA, SLA2, WIPI1                                                                                                                                                                                                                                                                                                                                                                                                                                                                                                                                                            |
| <2/≥1.5                            | AKAP13, APBA2, APOLD1, BIRC3, C10orf10, CYTIP, DDIT4, DISC1, EFHD1, ELMO1, FAIM, FAM134B, GADD45G, HOMER2, HOOK1, KIAA1033, MAP1B, NDRG4, NEDD4L, NPTX2, NRXN3, OSBPL1A, PDE4DIP, PIK3R5, PPP1R16B, PRR16, RASSF4, SRPX, SSR3, TACC1, TIPARP, TRIM35, UBE2H, USP53, VSTM2L, ZFAND5                                                                                                                                                                                                                                                                                                                                                                                           |
| <1.5/≥1.25                         | AKAP7, AKAP9, ANKHD1, APBB1, BAIAP2, BICC1, BNIP3, CABYR, CALCOCO2, CALD1, CCDC64, CDKN1C, CELF6, CEP350, CYFIP2, DEPTOR, EIF4EBP3, EMILIN3, FBXO31, FBXO32, FERMT2, FNBP1, FNBP1L, FNIP2, GADD45B, GCSAM, GMNN, HECTD2, HERC4, INHBB, IRS2, JAKMIP1, KCNK17, KLK14, LARP6, LDLRAD4, LGI1, LRRC16A, MAP1LC3C, MARVELD3, MCL1, METTL7A, MICAL1, MKLN1, MRO, MS4A6A, MTSS1, MTUS1, MYRIP, NANOS1, NDRG1, NFATC2IP, NFKBIA, NUDT16, PAGE4, PALD1, PLCB4, PNISR, PPP1CB, PRKAB1, PRPF38B, PTPLB, RBMS3, REPS2, RNPC3, RPH3AL, SECISBP2L, SESN1, SH3RF3, SLIT1, SLIT2, SNTG2, SORBS2, SPAG9, STOM, THEMIS2, THUMPDI, TOB1, TRIM52, TRPM2, TSKU, TSPYL2, UBE2D2, WASF2, WASF3, ZFR |
| <b>4. Metabolic and metabolism</b> |                                                                                                                                                                                                                                                                                                                                                                                                                                                                                                                                                                                                                                                                              |
| ≥2                                 | <u>ALOX15B</u> , CPM, INMT, GALNT15, GMPR, GNMT, MT1M, MTHFD2, PAPP, <u>PDK4</u> , SLC6A1, ST6GALNAC3, SULT2B1, SULT1E1, TPO                                                                                                                                                                                                                                                                                                                                                                                                                                                                                                                                                 |
| <2/≥1.5                            | AASS, ABCA6, ADAMTS1, AKR1C1, AOX1, ATP6V1C2, BCAT1, CHPT1, CHST4, DIO3, ECI2, ENPP1, GALNT18, HSD11B2, LPL, MAN1C1, MAOA, MATN3, MT1X, MT2A, NAMPT, NNMT, PFKFB2, SAMHD1, SLC16A12, SLC16A14, SLC19A2, SLC22A15, SLC26A2, SLCO2B1, SLCO4A1, SPTSSA, TAT, TBXAS1                                                                                                                                                                                                                                                                                                                                                                                                             |
| <1.5/≥1.25                         | ACSL1, AKR1C2, ANPEP, ARG2, ARSK, AS3MT, ATP10A, CA4, CHKA, CHST11, CORIN, CTH, CYP27A1, DCXR, ENPP3, ETNK2, GBA3, GFOD1, GFPT2, GGT5, GLUL, GNPTAB, GPM6B, GXYLT1, GXYLT2, HK1, HS6ST3, LOX, LPIN1, MAMDC2, MFNG, MGEA5, MGLL, MPC2, MT1A, MT1E, MT1F, MT1H, NOX4, NT5DC3, PAPLN, PAPP, PAPSS2, PDXK, PHKA1, PNMT, PRDX6, PRODH, SEC14L5, SLC16A10, SLC25A25, SLC29A2, SLC31A2, SLC38A1, SLC4A7, SLC7A8, SLCO3A1, SORD, SQLE, ST3GAL1, TP53I3,                                                                                                                                                                                                                              |
| <b>5. Other function</b>           |                                                                                                                                                                                                                                                                                                                                                                                                                                                                                                                                                                                                                                                                              |
| ≥2                                 | CLDN8, LCN6, NID1                                                                                                                                                                                                                                                                                                                                                                                                                                                                                                                                                                                                                                                            |
| <2/≥1.5                            | ADAMDEC1, C1QB, CEP70, CNST, LAMA2, LAMA3, ELN, LCN10, PRELP, RNASE6                                                                                                                                                                                                                                                                                                                                                                                                                                                                                                                                                                                                         |
| <1.5/≥1.25                         | CEP162, COL4A3, EPB41L5, LAMB1, MAP1LC3B, MYBPC1, MYO10, N4BP2, NINJ2, PLIN2, RIF1, RMI1, RPL4, SEPP1, SERPINF2, SHROOM3, SPAG4, SNORD16, SNORD18A, SNORD18B, SNORD18C, TCHP                                                                                                                                                                                                                                                                                                                                                                                                                                                                                                 |
| <b>6. Function not assigned</b>    |                                                                                                                                                                                                                                                                                                                                                                                                                                                                                                                                                                                                                                                                              |
| ≥2                                 | <u>FAM150B</u> , FAM196A, FIBIN                                                                                                                                                                                                                                                                                                                                                                                                                                                                                                                                                                                                                                              |
| <2/≥1.5                            | ARRDC2, C1orf162, C1orf168, CCDC85A, FAM198A, FAM21A, FAM21C, FNDC3B, FNDC3B, LOC101060254, LOC653513, MEI1, PRR15L, SMIM3, TM6SF1, TMEM132C, TMEM204, TMTC1,                                                                                                                                                                                                                                                                                                                                                                                                                                                                                                                |
| <1.5/≥1.25                         | ANKHD1-EIF4EBP3, ARMC12, BTNL9, C15orf43, C16orf45, C1orf21, C20orf197, C2orf72, CCDC152, CCDC68, CDV3, COBLL1, FAM102A, FAM105A, FAM111A, FAM126B, FAM153B, FAM169A, FAM177A1, FAM180A, FAM213A, FAM46C, FAM63B, FLVCR2, GATSL3, GOLGA2P10, IGSF21, LINC00341, LINC01588, LOC100128751, LONRF2, NKAPL, NXPE3, RANBP3L, RCS1, RFTN2, RSN1, SPDYE6, SPRYD7, TMEM108, TMEM192, TMEM61, TNFAIP8L3, WDYHV1, YPEL1, ZNF609                                                                                                                                                                                                                                                        |

The 889 probe sets showing  $\geq 1.25$  fold induction ( $P \leq 0.05$ ) by budesonide in the biopsy microarray analysis were analyzed by the DAVID gene ID conversion tool to produce 588 separate identities. Using gene ontology (GO) information and functional information from NCBI Gene, gene symbols were categorized into six general groups: 1, Transcriptional control; 2, Membrane receptors; 3, Signaling and regulation of signaling; 4, Metabolic and metabolism; 5, Other function; or 6, Function not assigned and further sub-divided as indicated. Gene symbols that are underlined were tested by qPCR.

SUPPLEMENTAL TABLE 5

Probe sets corresponding to the 23 genes validated by qPCR as being significantly induced by inhaled budesonide in the biopsy samples

| Gene    | qPCR (Fold) | Array data (Fold for each probe set)                 | Average array (Fold) |
|---------|-------------|------------------------------------------------------|----------------------|
| ALOX15B | 249.6***    | 2.34***, 1.86***, 1.42**, 1.05, 0.99                 | 1.53                 |
| CD163   | 10.53***    | 6.89***                                              | 6.89                 |
| CDKN1C  | 1.43**      | 1.45***, 1.41***, 1.36**, 1.29*                      | 1.38                 |
| CEBPD   | 2.13***     | 1.82***, 1.76***, 1.75***, 1.63***, 1.60***          | 1.71                 |
| CNR1    | 4.03***     | 2.55***, 0.99                                        | 1.77                 |
| CXCR4   | 4.26***     | 3.10***, 2.66**, 2.57**, 2.27**                      | 2.65                 |
| DUSP1   | 2.22**      | 1.78*, 1.44, 1.19, 1.05                              | 1.37                 |
| FAM150B | 9.12***     | 5.89***                                              | 5.89                 |
| FKBP5   | 15.69***    | 13.41***, 12.47***, 11.18***, 6.52***, 3.94***, 1.24 | 8.13                 |
| IGF1    | 4.38***     | 2.91***, 2.65***, 1.40**, 1.40*, 1.25                | 1.92                 |
| KLF9    | 3.65***     | 3.33***, 3.08***, 1.18, 1.08                         | 2.17                 |
| LIFR    | 2.04***     | 2.37***, 1.81**, 1.76***, 1.64***, 1.29*             | 1.78                 |
| NFKBIA  | 1.60***     | 1.53***, 1.46***, 1.38**                             | 1.46                 |
| PDK4    | 3.92***     | 3.62***, 1.68**                                      | 2.65                 |
| PER1    | 3.91***     | 3.48***, 1.09, 1.00                                  | 1.19                 |
| RGS1    | 4.20***     | 2.17**, 1.22                                         | 1.69                 |
| RGS2    | 1.91**      | 1.46*                                                | 1.46                 |
| SLC45A1 | 1.75**      | 1.13                                                 | 1.13                 |
| TFCP2L1 | 4.92***     | 3.00***, 2.77**, 2.45***                             | 2.45                 |
| TLR2    | 2.04**      | 1.35***, 1.25**, 1.24**                              | 1.28                 |
| TSC22D3 | 5.39***     | 4.06***, 3.83***, 2.77**                             | 3.55                 |
| ZBTB16  | 16.32***    | 12.75***                                             | 12.75                |
| ZFP36   | 1.96***     | 1.35 ( $P = 0.052$ )                                 | 1.35                 |

qPCR data for the indicated genes were taken from Figs 1 - 3 and are displayed as fold of placebo. Using the microarray data presented in Fig. 1A of the main manuscript, all probe sets corresponding to each of the indicated genes were identified and the fold induction for the individual probe sets provided. The relationship between qPCR and array data are plotted in Supplemental Fig. 4. Significance for qPCR and array data is as described in Figures 1 - 3 of the main manuscript. \*  $P \leq 0.05$ , \*\*  $P \leq 0.01$ , \*\*\*  $P \leq 0.001$ .

SUPPLEMENTAL TABLE 6

Functional annotation clustering of genes significantly increased by  $\geq 2$  fold (FDR 0.05) by budesonide inhalation in bronchial biopsies

| GO terms                                                                                                                                                                                                                                                                                                                                                                                                                                                                                                                                                                                                                                                                                                          | Genes                                                                                                                                   |
|-------------------------------------------------------------------------------------------------------------------------------------------------------------------------------------------------------------------------------------------------------------------------------------------------------------------------------------------------------------------------------------------------------------------------------------------------------------------------------------------------------------------------------------------------------------------------------------------------------------------------------------------------------------------------------------------------------------------|-----------------------------------------------------------------------------------------------------------------------------------------|
| <b>Annotation cluster 1</b>                                                                                                                                                                                                                                                                                                                                                                                                                                                                                                                                                                                                                                                                                       |                                                                                                                                         |
| Reg of cell migration (*), Reg of locomotion (*), Reg of cell motion (*)                                                                                                                                                                                                                                                                                                                                                                                                                                                                                                                                                                                                                                          | CXCR4, IGF1, PIK3R1, ALOX15B                                                                                                            |
| <b>Annotation cluster 2</b>                                                                                                                                                                                                                                                                                                                                                                                                                                                                                                                                                                                                                                                                                       |                                                                                                                                         |
| Purinergic nucleotide receptor activity - G-protein coupled (*), Nucleotide receptor activity - G-protein coupled (**), Integral to plasma membrane (**), Intrinsic to plasma membrane (**), Purinergic nucleotide receptor activity (**), Nucleotide receptor activity (**), Plasma membrane part (*), Rhodopsin-like G protein-coupled receptors, GPCR, rhodopsin-like superfamily, 7TM GPCR, rhodopsin-like, Plasma membrane, Cell surface receptor linked signal, transduction, Intrinsic to membrane, Integral to membrane, G-protein coupled receptor protein signaling pathway                                                                                                                             | ITGA10, GPR34, LIFR, CXCR4, CD163, TPO, CNR1, HCAR2/HCAR3, ADORA3, TPO, PKP2, IL17R, ZBTB16, CPM, PIK3R1, PAPP, CLEC4E, TSC22D3, MS4A4A |
| <b>Annotation cluster 3</b>                                                                                                                                                                                                                                                                                                                                                                                                                                                                                                                                                                                                                                                                                       |                                                                                                                                         |
| mTOR signaling pathway (*), Progesterone-mediated oocyte maturation (*), Intracellular signaling cascade                                                                                                                                                                                                                                                                                                                                                                                                                                                                                                                                                                                                          | RPS6KA2, IGF1, PIK3R1, KLF9, CXCR4, CNR1, CIT                                                                                           |
| <b>Annotation cluster 4</b>                                                                                                                                                                                                                                                                                                                                                                                                                                                                                                                                                                                                                                                                                       |                                                                                                                                         |
| Cytokine binding (*), Cytokine-cytokine receptor interaction (*), cell morphogenesis, Cellular component morphogenesis                                                                                                                                                                                                                                                                                                                                                                                                                                                                                                                                                                                            | LIFR, CXCR4, IL7R, TPO, IL7R, TFCEP2L1                                                                                                  |
| <b>Annotation cluster 5</b>                                                                                                                                                                                                                                                                                                                                                                                                                                                                                                                                                                                                                                                                                       |                                                                                                                                         |
| Apoptosis, Programmed cell death, Cell death, Death                                                                                                                                                                                                                                                                                                                                                                                                                                                                                                                                                                                                                                                               | TSC22D3, JADE1, ZBTB16, CXCR4, HCAR2, HCAR3                                                                                             |
| <b>Annotation cluster 6</b>                                                                                                                                                                                                                                                                                                                                                                                                                                                                                                                                                                                                                                                                                       |                                                                                                                                         |
| Lymphocyte activation, Leukocyte activation, Cell activation                                                                                                                                                                                                                                                                                                                                                                                                                                                                                                                                                                                                                                                      | CXCR4, PIK3R1, IL7R                                                                                                                     |
| <b>Annotation cluster 7</b>                                                                                                                                                                                                                                                                                                                                                                                                                                                                                                                                                                                                                                                                                       |                                                                                                                                         |
| Hemopoiesis, Hemopoietic or lymphoid organ development, Immune system development                                                                                                                                                                                                                                                                                                                                                                                                                                                                                                                                                                                                                                 | CXCR4, PIK3R1, IL7R                                                                                                                     |
| <b>Annotation cluster 8</b>                                                                                                                                                                                                                                                                                                                                                                                                                                                                                                                                                                                                                                                                                       |                                                                                                                                         |
| Small GTPase regulator activity, GTPase regulator activity, Nucleoside-triphosphatase regulator activity                                                                                                                                                                                                                                                                                                                                                                                                                                                                                                                                                                                                          | ERRF1, RHOBTB3, CIT                                                                                                                     |
| <b>Annotation cluster 9</b>                                                                                                                                                                                                                                                                                                                                                                                                                                                                                                                                                                                                                                                                                       |                                                                                                                                         |
| Response to wounding, Inflammatory response, Defense response                                                                                                                                                                                                                                                                                                                                                                                                                                                                                                                                                                                                                                                     | CXCR4, CD163, IGF1, ADORA3                                                                                                              |
| <b>Annotation cluster 10</b>                                                                                                                                                                                                                                                                                                                                                                                                                                                                                                                                                                                                                                                                                      |                                                                                                                                         |
| Transition metal ion binding, Metal ion binding, Cation binding, Ion binding, Zinc ion binding                                                                                                                                                                                                                                                                                                                                                                                                                                                                                                                                                                                                                    | KLF9, KLF15, MT1JP, MTIP3, JADE1, ZBTB16, PAPP, TPO, MT1M, CIT, CPM, ALOX15B, ITGA10, MTHFD2, GMPR, RPS6KA2                             |
| <b>Annotation cluster 11</b>                                                                                                                                                                                                                                                                                                                                                                                                                                                                                                                                                                                                                                                                                      |                                                                                                                                         |
| +ve reg of apoptosis, +ve reg of programmed cell death, +ve reg of cell death, Reg of cell proliferation, Reg of apoptosis, Reg of programmed cell death, Reg of cell death                                                                                                                                                                                                                                                                                                                                                                                                                                                                                                                                       | ZBTB16, HCAR2/HCAR3, ALOX15B, LIFR, IGF1                                                                                                |
| <b>Annotation cluster 12</b>                                                                                                                                                                                                                                                                                                                                                                                                                                                                                                                                                                                                                                                                                      |                                                                                                                                         |
| Transcription factor activity, Reg of transcription, DNA-dependent, Reg of RNA metabolic process, Transcription regulator activity, Reg of transcription, -ve reg of transcription, Transcription, -ve reg of gene expression, -ve reg of nucleobase, nucleoside, nucleotide and nucleic acid metabolic process, -ve reg of nitrogen compound metabolic process, -ve reg of macromolecule biosynthetic process, -ve reg of cellular biosynthetic process, Zinc finger, C2H2-type/integrase, DNA-binding, -ve reg of biosynthetic process, Zinc finger, C2H2-type, Reg of transcription from RNA polymerase II promoter, Zinc finger, C2H2-like, -ve reg of macromolecule metabolic process, ZnF_C2H2, DNA binding | KLF9, KLF15, TSC22D3, TFCEP2L1, HIF3A, ATAD2, PER1, IGF1, JADE1, ZBTB16,                                                                |

The 72 probe sets meeting the expression criteria ( $\geq 2$  fold, FDR 0.05) were analyzed using the DAVID gene ID conversion tool to provide a list of 46 up-regulated genes. Functional annotation clustering was performed in DAVID using a medium stringency. This produced 15 annotation clusters of which the top 12 are shown. GO terms mapping to each cluster are listed along with the total genes within each cluster. GO terms that are significantly associated with the gene list are indicated. \*  $P \leq 0.05$ , \*\*  $P \leq 0.01$ . Abbreviations: Reg = regulation, -ve = negative, +ve = positive.

SUPPLEMENTAL TABLE 7

Gene ontology (GO) terms used and not used in Fig. 2

|                                                                                                                                                                                                                                                                                                                                                                                                                                                                                                                                                                                                                                                                                                                                                                                                                                                                                                                                                                                                                                                                                                                                                                                                                                                                                                                                                                                                                                                                                                                                                                                                                                                                                                                                                                                                                                                                                                                                                                                                                                                                                                                                                                                                                                                                                                                                                                                                                                                                                                                                                                                                                                                                                                                                                                                                                                                                                                                                                                                                                                                                                                                                                                                                                                                                                                                                                                                                                                                                                                                                                                |
|----------------------------------------------------------------------------------------------------------------------------------------------------------------------------------------------------------------------------------------------------------------------------------------------------------------------------------------------------------------------------------------------------------------------------------------------------------------------------------------------------------------------------------------------------------------------------------------------------------------------------------------------------------------------------------------------------------------------------------------------------------------------------------------------------------------------------------------------------------------------------------------------------------------------------------------------------------------------------------------------------------------------------------------------------------------------------------------------------------------------------------------------------------------------------------------------------------------------------------------------------------------------------------------------------------------------------------------------------------------------------------------------------------------------------------------------------------------------------------------------------------------------------------------------------------------------------------------------------------------------------------------------------------------------------------------------------------------------------------------------------------------------------------------------------------------------------------------------------------------------------------------------------------------------------------------------------------------------------------------------------------------------------------------------------------------------------------------------------------------------------------------------------------------------------------------------------------------------------------------------------------------------------------------------------------------------------------------------------------------------------------------------------------------------------------------------------------------------------------------------------------------------------------------------------------------------------------------------------------------------------------------------------------------------------------------------------------------------------------------------------------------------------------------------------------------------------------------------------------------------------------------------------------------------------------------------------------------------------------------------------------------------------------------------------------------------------------------------------------------------------------------------------------------------------------------------------------------------------------------------------------------------------------------------------------------------------------------------------------------------------------------------------------------------------------------------------------------------------------------------------------------------------------------------------------------|
| <p><b>1A. GO terms used in Figure 2A – Budesonide up-regulated genes (<math>\geq 2</math> fold, <math>P \leq 0.05</math>)</b></p> <p><i>Transcription:</i> GO:0032583~regulation of gene-specific transcription; GO:0016481~negative regulation of transcription; GO:0010629~negative regulation of gene expression; GO:0045944~positive regulation of transcription from RNA polymerase II promoter*; GO:0010628~positive regulation of gene expression*; GO:0006357~regulation of transcription from RNA, polymerase II promoter*; GO:0045449~regulation of transcription</p> <p><i>Signaling:</i> GO:0034097~response to cytokine stimulus*; GO:0001817~regulation of cytokine production; GO:0000165~MAPKKK cascade; GO:0033674~positive regulation of kinase activity; hsa04060:Cytokine-cytokine receptor interaction; GO:0009968~negative regulation of signal transduction*; GO:0007169~transmembrane receptor protein tyrosine kinase signaling pathway*; GO:0043549~regulation of kinase activity; GO:0007167~enzyme linked receptor protein signaling pathway*; GO:0007243~protein kinase cascade*; GO:0006468~protein amino acid phosphorylation*; GO:0007242~intracellular signaling cascade*</p> <p><i>Metabolism:</i> GO:0010827~regulation of glucose transport*; GO:0010906~regulation of glucose metabolic process*; GO:0006109~regulation of carbohydrate metabolic process*; GO:0005996~monosaccharide metabolic process; GO:0051347~positive regulation of transferase activity; GO:0051050~positive regulation of transport*; GO:0051338~regulation of transferase activity; GO:0045934~negative regulation of nucleobase, nucleoside, nucleotide and nucleic acid metabolic process; GO:0010605~negative regulation of macromolecule metabolic process*; GO:0045935~positive regulation of nucleobase, nucleoside, nucleotide and nucleic acid metabolic process*; GO:0010604~positive regulation of macromolecule metabolic process*</p> <p><i>Proliferation, apoptosis and death:</i> GO:0045786~negative regulation of cell cycle*; GO:0008361~regulation of cell size; GO:0045596~negative regulation of cell differentiation; GO:0045597~positive regulation of cell differentiation*; GO:0040008~regulation of growth; GO:0000902~cell morphogenesis; GO:0051726~regulation of cell cycle; GO:0008285~negative regulation of cell proliferation; GO:0008284~positive regulation of cell proliferation; GO:0009611~response to wounding; GO:0042981~regulation of apoptosis; GO:0042127~regulation of cell proliferation**</p> <p><i>Defence and immune:</i> GO:0045321~leukocyte activation; GO:0002684~positive regulation of immune system process; GO:0006954~inflammatory response; GO:0006952~defense response; GO:0006955~immune response</p> <p><i>Cell motion, migration:</i> GO:0030335~positive regulation of cell migration*; GO:0040017~positive regulation of locomotion***; GO:0030334~regulation of cell migration***; GO:0040012~regulation of locomotion***; GO:0006928~cell motion</p> <p><i>Other:</i> hsa04960:Aldosterone-regulated sodium reabsorption*; hsa04910:Insulin signaling pathway; GO:0048545~response to steroid hormone stimulus; hsa04510:Focal adhesion; GO:0030036~actin cytoskeleton organization; GO:0031175~neuron projection development; GO:0001944~vasculature development; GO:0001501~skeletal system development; GO:0048666~neuron development; hsa05200:Pathways in cancer; GO:0051094~positive regulation of developmental process*; GO:0009725~response to hormone stimulus*</p> |
| <p><b>1B. GO terms not used in Figure 2A – Budesonide up-regulated genes (<math>\geq 2</math> fold, <math>P \leq 0.05</math>)</b></p> <p>GO:0035295~tube development; GO:0044057~regulation of system process; GO:0051240~positive regulation of multicellular organismal process; GO:0009719~response to endogenous stimulus; GO:0010035~response to inorganic substance*; GO:0044093~positive regulation of molecular function; GO:0048878~chemical homeostasis; GO:0030029~actin filament-based process; GO:0051270~regulation of cell motion***; GO:0010033~response to organic substance*; GO:0042592~homeostatic process; GO:0040007~growth; GO:0001558~regulation of cell growth; GO:0043068~positive regulation of programmed cell death; GO:0010942~positive regulation of cell death; GO:0012501~programmed cell death; GO:0043067~regulation of programmed cell death; GO:0010941~regulation of cell death; GO:0008219~cell death; GO:0016265~death; GO:0010558~negative regulation of macromolecule biosynthetic process*; GO:0031327~negative regulation of cellular biosynthetic process*; GO:0010557~positive regulation of macromolecule biosynthetic process*; GO:0031328~positive regulation of cellular biosynthetic process*; GO:0048584~positive regulation of response to stimulus; GO:0051174~regulation of phosphorus metabolic process*; GO:0019220~regulation of phosphate metabolic process*; GO:0006793~phosphorus metabolic process*; GO:0006366~transcription from RNA polymerase II promoter; GO:0045892~negative regulation of transcription, DNA-dependent; GO:0045893~positive regulation of transcription, DNA-dependent*; GO:0051252~regulation of RNA metabolic process; GO:0046324~regulation of glucose import*; GO:0051254~positive regulation of RNA metabolic process*; GO:0045941~positive regulation of transcription*; GO:0006355~regulation of transcription, DNA-dependent; GO:0050865~regulation of cell activation; GO:0045860~positive regulation of protein kinase activity; GO:0001775~cell activation; GO:0045859~regulation of protein kinase activity; GO:0042325~regulation of phosphorylation*; GO:0006796~phosphate metabolic process*; GO:0010648~negative regulation of cell communication*; GO:0010675~regulation of cellular carbohydrate metabolic process*; GO:0051172~negative</p>                                                                                                                                                                                                                                                                                                                                                                                                                                                                                                                                                                                                                                                                                                                                                                                                                                                                                                                                                                                                                                                                                                                                                                                                            |

regulation of nitrogen compound metabolic process; GO:0009890~negative regulation of biosynthetic process\*\*;  
 GO:0051173~positive regulation of nitrogen compound metabolic process\*\*;  
 GO:0009891~positive regulation of biosynthetic process\*;  
 GO:0000904~cell morphogenesis involved in differentiation;  
 GO:0032989~cellular component morphogenesis;  
 GO:0008283~cell proliferation;  
 GO:0006915~apoptosis;  
 GO:0051249~regulation of lymphocyte activation;  
 GO:0046649~lymphocyte activation;  
 GO:0001568~blood vessel development;  
 GO:0051272~positive regulation of cell motion\*\*;  
 GO:0006350~transcription;  
 GO:0051253~negative regulation of RNA metabolic process;  
 GO:0016310~phosphorylation\*\*;  
 GO:0031399~regulation of protein modification process;  
 GO:0001932~regulation of protein amino acid phosphorylation;  
 GO:0043065~positive regulation of apoptosis;  
 GO:0002694~regulation of leukocyte activation;  
 GO:0030030~cell projection organization;  
 GO:0003006~reproductive developmental process;  
 GO:0032535~regulation of cellular component size

**2. GO terms associated with ( $P \leq 0.05$ ) Budesonide down-regulated genes ( $\leq 0.5$  fold,  $P \leq 0.05$ )**

*Transcription:* No GO terms

*Signaling:* GO:0007166~cell surface receptor linked signal transduction; GO:0007186~G-protein coupled receptor protein signaling pathway; GO:0032101~regulation of response to external stimulus; GO:0019932~second-messenger-mediated signaling; GO:0005125~cytokine activity\*\*\*; GO:0008009~chemokine activity\*\*;  
 GO:0042379~chemokine receptor binding\*\*;  
 GO:0048019~receptor antagonist activity; GO:0030547~receptor inhibitor activity;  
 GO:0030545~receptor regulator activity; hsa04060:Cytokine-cytokine receptor interaction\*\*;  
 hsa04062:Chemokine signaling pathway\*\*

*Metabolism:* GO:0030574~collagen catabolic process; GO:0032963~collagen metabolic process;  
 GO:0044259~multicellular organismal macromolecule metabolic process; GO:0044236~multicellular organismal metabolic process;  
 GO:0044243~multicellular organismal catabolic process

*Proliferation, apoptosis and death:* GO:0008284~positive regulation of cell proliferation

*Defence and immune:* GO:0009611~response to wounding\*\*\*; GO:0006952~defense response\*\*\*; GO:0006954~inflammatory response\*\*\*;  
 GO:0006955~immune response; GO:0002684~positive regulation of immune system process

*Cell motion, migration:* GO:0007155~cell adhesion\*\*;  
 GO:0022610~biological adhesion\*\*;  
 GO:0042330~taxis\*\*\*; GO:0006935~chemotaxis\*\*\*;  
 GO:0007626~locomotory behavior\*\*;  
 GO:0016477~cell migration\*;  
 GO:0048870~cell motility\*;  
 GO:0051674~localization of cell\*;  
 GO:0006928~cell motion\*;  
 GO:0050900~leukocyte migration\*\*;  
 GO:0016337~cell-cell adhesion; GO:0050901~leukocyte tethering or rolling;  
 GO:0045123~cellular extravasation  
 GO:0007157~heterophilic cell adhesion; GO:0007159~leukocyte adhesion; GO:0030595~leukocyte chemotaxis;  
 GO:0060326~cell chemotaxis

*Other:* GO:0007610~behavior\*\*;  
 GO:0010033~response to organic substance\*;  
 GO:0006874~cellular calcium ion homeostasis\*;  
 GO:0055074~calcium ion homeostasis\*;  
 GO:0048545~response to steroid hormone stimulus\*;  
 GO:0006875~cellular metal ion homeostasis\*;  
 GO:0055065~metal ion homeostasis\*;  
 GO:0030005~cellular di-, tri-valent inorganic cation homeostasis;  
 GO:0055066~di-, tri-valent inorganic cation homeostasis;  
 GO:0030003~cellular cation homeostasis;  
 GO:0055080~cation homeostasis;  
 GO:0009725~response to hormone stimulus;  
 GO:0006873~cellular ion homeostasis;  
 GO:0055082~cellular chemical homeostasis;  
 GO:0009719~response to endogenous stimulus;  
 GO:0050801~ion homeostasis;  
 GO:0019725~cellular homeostasis;  
 GO:0048878~chemical homeostasis

The 889 probe sets showing  $\geq 1.25$  fold induction ( $P \leq 0.05$ ) by budesonide (Supplemental Table 3) in the microarray analysis depicted in Fig. 2 were analyzed using the DAVID gene identity conversion tool. This produced 588 separate gene identities, which were analyzed using the DAVID functional annotation tool (default settings, medium stringency) and resulted in 647 GO terms containing at least 2 gene symbols each. Of these, 420 were significantly associated ( $P \leq 0.05$ ) with the gene list and 235 corresponded to GO terms for biological process (GOTERM\_BP\_FAT) or KEGG (KEGG\_PATHWAY). Selected terms used to generate Fig. 2A are listed above (Supplemental Table 7, part 1A). Significantly associated terms not used in Fig. 2A are listed (Supplemental Table 7, part 1B). Terms showing significant fold enrichment, Benjamini  $\leq 0.05$ ,  $\leq 0.01$  &  $\leq 0.001$ , with budesonide inhalation are indicated (\*, \*\*, and \*\*\* respectively). An identical analysis was also performed on the 35 probe sets down-regulated  $\leq 0.5$  fold ( $P \leq 0.05$ ) by inhaled budesonide. The 28 genes thus identified were subjected to functional annotation to give 107 GO terms that were significantly associated with the probe list. Of these 57 correspond to biological process (GOTERM\_BP\_FAT) or KEGG (KEGG\_PATHWAY) or molecular function (GOTERM\_MF\_FAT) and are listed above (Supplemental Table 7, part 2). Selected terms are used in Figure 2C. Terms showing significant fold enrichment, Benjamini  $\leq 0.05$ ,  $\leq 0.01$  &  $\leq 0.001$ , with budesonide are indicated (\*, \*\*, and \*\*\* respectively).

SUPPLEMENTAL TABLE 8

Functional cluster analysis with the 588 budesonide up-regulated ( $\geq 1.25$ ,  $P \leq 0.05$ ) genes

| <b>Cluster 1</b>                                                   |          | <b>Enrichment Score: 5.53</b> |                                                                                                                                                                                                                                  |             |                  |  |
|--------------------------------------------------------------------|----------|-------------------------------|----------------------------------------------------------------------------------------------------------------------------------------------------------------------------------------------------------------------------------|-------------|------------------|--|
| <b>Term</b>                                                        | <b>%</b> | <b>P</b>                      |                                                                                                                                                                                                                                  | <b>Fold</b> | <b>Benjamini</b> |  |
| GO:0040012~regulation of locomotion                                | 4.15     | 3.48E-08                      | ALOX15B, CITED2, CXCR4, ERBB4, F2R, F3, IGF1, IGFBP5, IL16, IL6R, IL6ST, INSR, IRS2, LAMA2, LAMA3, LAMB1, PDGFRA, PIK3R1, PRKCA, PTK2B, PTPRM, SLIT2, SPAG9, TGFBR3                                                              | 3.98        | 8.39E-05         |  |
| GO:0030334~regulation of cell migration                            | 3.63     | 3.35E-07                      | ALOX15B, CITED2, CXCR4, ERBB4, F2R, F3, IGF1, IGFBP5, IL6R, IL6ST, INSR, IRS2, LAMA2, LAMA3, LAMB1, PDGFRA, PIK3R1, PTK2B, PTPRM, SPAG9, TGFBR3                                                                                  | 3.96        | 4.04E-04         |  |
| GO:0040017~positive regulation of locomotion                       | 2.76     | 3.66E-07                      | ERBB4, F2R, F3, IGF1, IL16, IL6R, IL6ST, INSR, IRS2, LAMB1, PDGFRA, PIK3R1, PRKCA, PTK2B, SLIT2, SPAG9                                                                                                                           | 5.20        | 2.94E-04         |  |
| GO:0051270~regulation of cell motion                               | 3.80     | 7.03E-07                      | ALOX15B, BCL6, CITED2, CXCR4, ERBB4, F2R, F3, IGF1, IGFBP5, IL6R, IL6ST, INSR, IRS2, LAMA2, LAMA3, LAMB1, PDGFRA, PIK3R1, PTK2B, PTPRM, SPAG9, TGFBR3                                                                            | 3.63        | 4.23E-04         |  |
| GO:0051272~positive regulation of cell motion                      | 2.42     | 1.12E-05                      | BCL6, ERBB4, F2R, F3, IGF1, IL6R, IL6ST, INSR, IRS2, LAMB1, PDGFRA, PIK3R1, PTK2B, SPAG9                                                                                                                                         | 4.55        | 0.0026938        |  |
| GO:0030335~positive regulation of cell migration                   | 2.25     | 2.06E-05                      | ERBB4, F2R, F3, IGF1, IL6R, IL6ST, INSR, IRS2, LAMB1, PDGFRA, PIK3R1, PTK2B, SPAG9                                                                                                                                               | 4.65        | 0.0032989        |  |
| GO:0008284~positive regulation of cell proliferation               | 4.32     | 0.003                         | BCL6, CD86, EBI3, ERBB4, F2R, F3, FLT3, FOSL2, HIPK2, IGF1, IL6R, IL6ST, INSR, IRS2, ITGB1, LAMB1, LIFR, NAMPT, NAP1L1, PDGFRA, PPP1CB, PRKCA, PTK2B, RUNX2, TNFSF4                                                              | 1.92        | 0.1180929        |  |
| <b>Cluster 2</b>                                                   |          | <b>Enrichment Score: 5.47</b> |                                                                                                                                                                                                                                  |             |                  |  |
| <b>Term</b>                                                        | <b>%</b> | <b>P</b>                      |                                                                                                                                                                                                                                  | <b>Fold</b> | <b>Benjamini</b> |  |
| PIRSF002564:metallothionein                                        | 1.21     | 2.86E-07                      | MT1A, MT1E, MT1F, MT1H, MT1JP, MT1M, MT1P3, MT1X, MT2A                                                                                                                                                                           | 21.01       | 7.44E-05         |  |
| IPR018064:Metallothionein, vertebrate, metal binding site          | 1.21     | 3.17E-07                      | MT1A, MT1E, MT1F, MT1H, MT1JP, MT1M, MT1P3, MT1X, MT2A                                                                                                                                                                           | 20.83       | 2.72E-04         |  |
| IPR000006:Metallothionein, vertebrate                              | 1.21     | 6.17E-07                      | MT1A, MT1E, MT1F, MT1H, MT1JP, MT1M, MT1P3, MT1X, MT2A                                                                                                                                                                           | 19.09       | 2.65E-04         |  |
| IPR003019:Metallothionein superfamily, eukaryotic                  | 1.21     | 6.17E-07                      | MT1A, MT1E, MT1F, MT1H, MT1JP, MT1M, MT1P3, MT1X, MT2A                                                                                                                                                                           | 19.09       | 2.65E-04         |  |
| GO:0046870~cadmium ion binding                                     | 1.04     | 6.94E-06                      | MT1A, MT1E, MT1F, MT1H, MT1JP, MT1M, MT1P3, MT1X                                                                                                                                                                                 | 18.86       | 0.0047356        |  |
| GO:0005507~copper ion binding                                      | 1.38     | 0.006                         | LOX, MT1A, MT1E, MT1F, MT1H, MT1JP, MT1M, MT1P3, MT1X, SLC31A2                                                                                                                                                                   | 3.64        | 0.3170694        |  |
| <b>Cluster 3</b>                                                   |          | <b>Enrichment Score: 3.61</b> |                                                                                                                                                                                                                                  |             |                  |  |
| <b>Term</b>                                                        | <b>%</b> | <b>P</b>                      |                                                                                                                                                                                                                                  | <b>Fold</b> | <b>Benjamini</b> |  |
| IPR017441:Protein kinase, ATP binding site                         | 5.87     | 4.06E-06                      | AKAP9, AKT3, BLK, CAMK2B, CIT, CSF1R, DAPK1, ERBB4, FGR, FLT3, HIPK2, INSR, IRAK3, LATS2, MAP3K6, MERTK, MKNK2, NIM1K, NTRK3, PAK3, PDGFRA, PRKCA, PTK2B, ROR1, RPS6KA2, RPS6KA5, SGK1, SIK1, TAOK1, TRIO, TXK, UHMK1, WNK1, ZAK | 2.45        | 0.0011636        |  |
| IPR000719:Protein kinase, core                                     | 5.87     | 1.05E-05                      | AKAP9, AKT3, BLK, CAMK2B, CIT, CSF1R, DAPK1, ERBB4, FGR, FLT3, HIPK2, INSR, IRAK3, LATS2, MAP3K6, MERTK, MKNK2, NIM1K, NTRK3, PAK3, PDGFRA, PRKCA, PTK2B, ROR1, RPS6KA2, RPS6KA5, SGK1, SIK1, TAOK1, TRIO, TXK, UHMK1, WNK1, ZAK | 2.34        | 0.0022478        |  |
| IPR008266:Tyrosine protein kinase, active site                     | 2.07     | 1.77E-4                       | BLK, CSF1R, ERBB4, FGR, FLT3, INSR, MERTK, NTRK3, PDGFRA, PTK2B, ROR1, TXK                                                                                                                                                       | 4.05        | 0.0251222        |  |
| IPR001245:Tyrosine protein kinase                                  | 2.25     | 2.58E-4                       | BLK, CSF1R, ERBB4, FGR, FLT3, INSR, MERTK, NTRK3, PDGFRA, PTK2B, ROR1, TXK, ZAK                                                                                                                                                  | 3.61        | 0.0312315        |  |
| SM00219:TyrKc                                                      | 2.25     | 7.38E-4                       | BLK, CSF1R, ERBB4, FGR, FLT3, INSR, MERTK, NTRK3, PDGFRA, PTK2B, ROR1, TXK, ZAK                                                                                                                                                  | 3.19        | 0.0683906        |  |
| GO:0004714~transmembrane receptor protein tyrosine kinase activity | 1.38     | 0.005                         | CSF1R, ERBB4, FLT3, INSR, MERTK, NTRK3, PDGFRA, ROR1                                                                                                                                                                             | 3.75        | 0.3000027        |  |
| GO:0004713~protein tyrosine kinase activity                        | 2.25     | 0.007                         | BLK, CSF1R, ERBB4, FGR, FLT3, INSR, MERTK, NTRK3, PDGFRA, PTK2B, ROR1, TXK, ZAK                                                                                                                                                  | 2.46        | 0.2971148        |  |
| <b>Cluster 4</b>                                                   |          | <b>Enrichment Score: 3.46</b> |                                                                                                                                                                                                                                  |             |                  |  |
| <b>Term</b>                                                        | <b>%</b> | <b>P</b>                      |                                                                                                                                                                                                                                  | <b>Fold</b> | <b>Benjamini</b> |  |
| GO:0051254~positive regulation of                                  | 6.04     | 8.48E-06                      | APBB1, ARNTL, ATXN7, BMP2, CITED2, CSRNPI, ERCC6, F2R, FOXO1, FOXO3, FOXO3B, GLIS3, HAND2, HIPK2, HMGB2, IGF1, IKZF1, INHBA, KLF13, KLF15, KLF6,                                                                                 | 2.32        | 0.002269         |  |



|                                                                                                         |       |          |                                                                                                                                                                                                                                                                                                                                                                                                                                                                                                                                                                                   |      |           |
|---------------------------------------------------------------------------------------------------------|-------|----------|-----------------------------------------------------------------------------------------------------------------------------------------------------------------------------------------------------------------------------------------------------------------------------------------------------------------------------------------------------------------------------------------------------------------------------------------------------------------------------------------------------------------------------------------------------------------------------------|------|-----------|
| RNA metabolic process                                                                                   |       |          | KLF7, MAFB, NFIB, NFIC, NFKBIA, NR2E3, PIAS1, PPARGC1A, RORA, RUNX2, TCF21, TFEB, THRA, TTF1, ZBTB38                                                                                                                                                                                                                                                                                                                                                                                                                                                                              |      |           |
| GO:0045935~positive regulation of nucleobase, nucleoside, nucleotide and nucleic acid metabolic process | 7.08  | 1.38E-05 | APBB1, ARNTL, ATXN7, BMP2, CD86, CITED2, CSRN1, ERCC6, F2R, FOXO1, FOXO3, FOXO3B, GLIS3, HAND2, HIPK2, HMGB2, IGF1, IKZF1, INHBA, INSR, KLF13, KLF15, KLF2, KLF6, KLF7, MAFB, MGEA5, NFIB, NFIC, NFKBIA, NR2E3, PDGFRA, PIAS1, PPARGC1A, RORA, RUNX2, TBX21, TCF21, TFEB, THRA, TTF1, ZBTB38                                                                                                                                                                                                                                                                                      | 2.09 | 0.0030251 |
| GO:0045944~positive regulation of transcription from RNA polymerase II promoter                         | 5.01  | 1.63E-05 | APBB1, ARNTL, ATXN7, BMP2, CITED2, CSRN1, FOXO1, FOXO3, FOXO3B, GLIS3, HAND2, HIPK2, HMGB2, IGF1, IKZF1, INHBA, KLF13, KLF6, MAFB, NFIB, NFIC, NFKBIA, NR2E3, PPARGC1A, RORA, RUNX2, TFEB, THRA, TTF1, ZBTB38                                                                                                                                                                                                                                                                                                                                                                     | 2.49 | 0.0030236 |
| GO:0045893~positive regulation of transcription, DNA-dependent                                          | 5.87  | 1.76E-05 | APBB1, ARNTL, ATXN7, BMP2, CITED2, CSRN1, F2R, FOXO1, FOXO3, FOXO3B, GLIS3, HAND2, HIPK2, HMGB2, IGF1, IKZF1, INHBA, KLF13, KLF15, KLF6, KLF7, MAFB, NFIB, NFIC, NFKBIA, NR2E3, PIAS1, PPARGC1A, RORA, RUNX2, TCF21, TFEB, THRA, TTF1, ZBTB38                                                                                                                                                                                                                                                                                                                                     | 2.27 | 0.0030343 |
| GO:0051173~positive regulation of nitrogen compound metabolic process                                   | 7.08  | 2.85E-05 | APBB1, ARNTL, ATXN7, BMP2, CD86, CITED2, CSRN1, ERCC6, F2R, FOXO1, FOXO3, FOXO3B, GLIS3, HAND2, HIPK2, HMGB2, IGF1, IKZF1, INHBA, INSR, KLF13, KLF15, KLF2, KLF6, KLF7, MAFB, MGEA5, NFIB, NFIC, NFKBIA, NR2E3, PDGFRA, PIAS1, PPARGC1A, RORA, RUNX2, TBX21, TCF21, TFEB, THRA, TTF1, ZBTB38                                                                                                                                                                                                                                                                                      | 2.03 | 0.0036155 |
| GO:0010557~positive regulation of macromolecule biosynthetic process                                    | 7.08  | 4.03E-05 | APBB1, ARNTL, ATXN7, BMP2, CD86, CITED2, CSRN1, EB13, F2R, FOXO1, FOXO3, FOXO3B, GLIS3, HAND2, HIPK2, HMGB2, IGF1, IKZF1, INHBA, INSR, IRS2, KLF13, KLF15, KLF2, KLF6, KLF7, MAFB, NFIB, NFIC, NFKBIA, NR2E3, PDGFRA, PIAS1, PPARGC1A, PTK2B, RORA, RUNX2, TCF21, TFEB, THRA, TTF1, ZBTB38                                                                                                                                                                                                                                                                                        | 2.00 | 0.0048431 |
| GO:0006357~regulation of transcription from RNA polymerase II promoter                                  | 7.60  | 4.45E-05 | APBB1, ARNTL, ASCL3, ATF5, ATXN7, BCL6, BMP2, CDKN1C, CITED2, CSRN1, FOSL2, FOXO1, FOXO3, FOXO3B, GLIS3, GZF1, HAND2, HIPK2, HMGB2, IGF1, IKZF1, INHBA, KLF13, KLF6, KLF7, KLF9, MAFB, NFIB, NFIC, NFKBIA, NR2E3, PPARGC1A, RORA, RUNX2, SIK1, SLA2, SMARCD2, SPEN, TFPC2L1, TFEB, THRA, TTF1, ZBTB38, ZFH3, ZNF157                                                                                                                                                                                                                                                               | 1.93 | 0.005101  |
| GO:0045941~positive regulation of transcription                                                         | 6.22  | 9.30E-05 | APBB1, ARNTL, ATXN7, BMP2, CD86, CITED2, CSRN1, F2R, FOXO1, FOXO3, FOXO3B, GLIS3, HAND2, HIPK2, HMGB2, IGF1, IKZF1, INHBA, KLF13, KLF15, KLF2, KLF6, KLF7, MAFB, NFIB, NFIC, NFKBIA, NR2E3, PIAS1, PPARGC1A, RORA, RUNX2, TCF21, TFEB, THRA, TTF1, ZBTB38                                                                                                                                                                                                                                                                                                                         | 2.03 | 0.0089283 |
| GO:0031328~positive regulation of cellular biosynthetic process                                         | 7.08  | 1.10E-4  | APBB1, ARNTL, ATXN7, BMP2, CD86, CITED2, CSRN1, EB13, F2R, FOXO1, FOXO3, FOXO3B, GLIS3, HAND2, HIPK2, HMGB2, IGF1, IKZF1, INHBA, INSR, IRS2, KLF13, KLF15, KLF2, KLF6, KLF7, KLF9, MAFB, NFIB, NFIC, NFKBIA, NR2E3, PDGFRA, PIAS1, PPARGC1A, PTK2B, RORA, RUNX2, TCF21, TFEB, THRA, TTF1, ZBTB38                                                                                                                                                                                                                                                                                  | 1.91 | 0.0101749 |
| GO:0010604~positive regulation of macromolecule metabolic process                                       | 8.29  | 1.25E-4  | APBB1, ARNTL, ATXN7, BMP2, CCND3, CD86, CITED2, CSRN1, EB13, ERCC6, F2R, FOXO1, FOXO3, FOXO3B, GLIS3, HAND2, HIPK2, HMGB2, IGF1, IKZF1, IL6R, IL6ST, INHBA, INSR, IRS2, KLF13, KLF15, KLF2, KLF6, KLF7, MAFB, MGEA5, NFIB, NFIC, NFKBIA, NR2E3, PDGFRA, PIAS1, PPARGC1A, PRKCA, PTK2B, RORA, RUNX2, TBX21, TCF21, TFEB, THRA, TTF1, ZBTB38                                                                                                                                                                                                                                        | 1.78 | 0.0107249 |
| GO:0009891~positive regulation of biosynthetic process                                                  | 7.08  | 1.50E-4  | APBB1, ARNTL, ATXN7, BMP2, CD86, CITED2, CSRN1, EB13, F2R, FOXO1, FOXO3, FOXO3B, GLIS3, HAND2, HIPK2, HMGB2, IGF1, IKZF1, INHBA, INSR, IRS2, KLF13, KLF15, KLF2, KLF6, KLF7, KLF9, MAFB, NFIB, NFIC, NFKBIA, NR2E3, PDGFRA, PIAS1, PPARGC1A, PTK2B, RORA, RUNX2, TCF21, TFEB, THRA, TTF1, ZBTB38                                                                                                                                                                                                                                                                                  | 1.88 | 0.0123974 |
| GO:0010628~positive regulation of gene expression                                                       | 6.22  | 1.65E-4  | APBB1, ARNTL, ATXN7, BMP2, CD86, CITED2, CSRN1, F2R, FOXO1, FOXO3, FOXO3B, GLIS3, HAND2, HIPK2, HMGB2, IGF1, IKZF1, INHBA, KLF13, KLF15, KLF2, KLF6, KLF7, MAFB, NFIB, NFIC, NFKBIA, NR2E3, PIAS1, PPARGC1A, RORA, RUNX2, TCF21, TFEB, THRA, TTF1, ZBTB38                                                                                                                                                                                                                                                                                                                         | 1.97 | 0.0123702 |
| GO:0006355~regulation of transcription, DNA-dependent                                                   | 13.47 | 0.002    | APBB1, ARNTL, ASCL3, ATF5, ATRX, ATXN7, BATF, BCL6, BMP2, CDKN1C, CEBPD, CITED2, CREBRF, CSRN1, ERCC6, F2R, FOSL2, FOXN2, FOXO1, FOXO3, FOXO3B, GLIS3, GZF1, HAND2, HIF3A, HIPK2, HMGB2, IGF1, IKZF1, INHBA, INSR, IRX3, KLF13, KLF15, KLF6, KLF7, KLF9, MAFB, NFATC2IP, NFIA, NFIB, NFIC, NFIL3, NFKBIA, NR2E3, PBX4, PER1, PIAS1, PPARGC1A, RORA, RPS6KA5, RUNX2, SIK1, SLA2, SMARCD2, SPEN, TBX21, TCF21, TFPC2L1, TFEB, THRA, TNFSF4, TSC22D3, TTF1, ZBTB16, ZBTB38, ZFH3, ZHX3, ZNF157, ZNF234, ZNF275, ZNF320, ZNF331, ZNF540, ZNF561, ZNF57, ZNF682, ZNF763, ZNF844        | 1.40 | 0.0801575 |
| GO:0051252~regulation of RNA metabolic process                                                          | 13.64 | 0.002    | APBB1, ARNTL, ASCL3, ATF5, ATRX, ATXN7, BATF, BCL6, BMP2, CDKN1C, CEBPD, CELF6, CITED2, CREBRF, CSRN1, ERCC6, F2R, FOSL2, FOXN2, FOXO1, FOXO3, FOXO3B, GLIS3, GZF1, HAND2, HIF3A, HIPK2, HMGB2, IGF1, IKZF1, INHBA, INSR, IRX3, KLF13, KLF15, KLF6, KLF7, KLF9, MAFB, NFATC2IP, NFIA, NFIB, NFIC, NFIL3, NFKBIA, NR2E3, PBX4, PER1, PIAS1, PPARGC1A, RORA, RPS6KA5, RUNX2, SIK1, SLA2, SMARCD2, SPEN, TBX21, TCF21, TFPC2L1, TFEB, THRA, TNFSF4, TSC22D3, TTF1, ZBTB16, ZBTB38, ZFH3, ZHX3, ZNF157, ZNF234, ZNF275, ZNF320, ZNF331, ZNF540, ZNF561, ZNF57, ZNF682, ZNF763, ZNF844 | 1.39 | 0.0911902 |
| GO:0003700~transcription factor activity                                                                | 7.94  | 0.007    | ARNTL, ATAD2, ATF5, BATF, BCL6, CEBPD, CITED2, CREBRF, CSRN1, FOSL2, FOXN2, FOXO1, FOXO3, FOXO3B, GLIS3, HAND2, HIF3A, HMGB2, IKZF1, IRX3, KLF15, KLF2, KLF6, KLF7, KLF9, MAFB, MYEF2, NFIA, NFIB, NFIC, NFIL3, NR2E3, PBX4,                                                                                                                                                                                                                                                                                                                                                      | 1.48 | 0.2910864 |

|                                               |                               |          |                                                                                                                                                                                                                                                                                                                                                                                                                                                                                                                                                                                                                                                                                                                                                       |             |                  |
|-----------------------------------------------|-------------------------------|----------|-------------------------------------------------------------------------------------------------------------------------------------------------------------------------------------------------------------------------------------------------------------------------------------------------------------------------------------------------------------------------------------------------------------------------------------------------------------------------------------------------------------------------------------------------------------------------------------------------------------------------------------------------------------------------------------------------------------------------------------------------------|-------------|------------------|
|                                               |                               |          | RORA, RUNX2, SPEN, TBX21, TCF21, TFPC2L1, TFEB, THRA, TSC22D3, ZBTB16, ZBTB38, ZFH3, ZHX3, ZNF157                                                                                                                                                                                                                                                                                                                                                                                                                                                                                                                                                                                                                                                     |             |                  |
| GO:0045449~regulation of transcription        | 17.62                         | 0.010    | AFF3, APBB1, ARNTL, ASCL3, ATAD2, ATF5, ATOH8, ATRX, ATXN7, BATF, BCL6, BMP2, CAMTA1, CD86, CDKN1C, CEBPD, CITED2, CREBRF, CRY2, CSRN1, EID3, ERCC6, F2R, FAM120B, FOSL2, FOXN2, FOXO1, FOXO3, FOXO3B, GLIS3, GZF1, HAND2, HIF3A, HIPK2, HMGB2, IGF1, IKZF1, IL16, INHBA, INSR, IRAK3, IRX3, JADE1, KLF13, KLF15, KLF2, KLF6, KLF7, KLF9, MAFB, NFATC2IP, NFIA, NFIB, NFIC, NFIL3, NFKB1A, NR2E3, PBX4, PER1, PIAS1, POU2AF1, PPARGC1A, PRR15L, RORA, RPS6KA5, RUNX2, SCML4, SIK1, SLA2, SMARCD2, SNAPC3, SPEN, TBX21, TCF21, TFPC2L1, TFEB, TGFB3, THRA, TLR2, TNFSF4, TOX2, TSC22D3, TSPYL2, TTF1, VGLL3, ZBTB16, ZBTB20, ZBTB38, ZBTB8A, ZFH3, ZHX3, ZNF157, ZNF234, ZNF275, ZNF320, ZNF331, ZNF540, ZNF561, ZNF57, ZNF652, ZNF682, ZNF763, ZNF844 | 1.25        | 0.2210508        |
| GO:0030528~transcription regulator activity   | 11.05                         | 0.014    | ARNTL, ASCL3, ATAD2, ATF5, ATOH8, BATF, BCL6, BMP2, CAMTA1, CD86, CDKN1C, CEBPD, CITED2, CREBRF, CSRN1, ERCC6, FHL5, FOSL2, FOXN2, FOXO1, FOXO3, FOXO3B, GLIS3, HAND2, HIF3A, HIPK2, HMGB2, IKZF1, IRX3, KLF13, KLF15, KLF2, KLF6, KLF7, KLF9, MAFB, MYEF2, NFIA, NFIB, NFIC, NFIL3, NR2E3, PBX4, PIAS1, POU2AF1, PPARGC1A, RORA, RUNX2, SIK1, SMARCD2, SPEN, TBX21, TCF21, TFPC2L1, TFEB, THRA, TOB1, TSC22D3, TTF1, VGLL3, ZBTB16, ZBTB38, ZFH3, ZHX3, ZNF157                                                                                                                                                                                                                                                                                       | 1.33        | 0.436208         |
| GO:0006350~transcription                      | 13.82                         | 0.044    | AFF3, APBB1, ARNTL, ASCL3, ATAD2, ATF5, ATOH8, ATRX, BATF, BCL6, CAMTA1, CEBPD, CITED2, CRY2, CSRN1, EID3, ERCC6, FAM120B, FOXN2, FOXO1, FOXO3, FOXO3B, GLIS3, GZF1, HAND2, HIF3A, HIPK2, IKZF1, IL16, JADE1, KLF13, KLF15, KLF2, KLF6, KLF7, KLF9, MAFB, MYEF2, NFIA, NFIB, NFIC, NFIL3, NR2E3, PBX4, PER1, PIAS1, POU2AF1, PPARGC1A, RORA, RUNX2, SCML4, SMARCD2, SNAPC3, SPEN, TBX21, TCF21, TFPC2L1, TFEB, THRA, TOX2, TSPYL2, TTF1, VGLL3, ZBTB16, ZBTB20, ZBTB38, ZBTB8A, ZFH3, ZHX3, ZNF157, ZNF234, ZNF275, ZNF320, ZNF331, ZNF540, ZNF561, ZNF57, ZNF652, ZNF682, ZNF763, ZNF844                                                                                                                                                             | 1.21        | 0.4553421        |
| GO:0003677~DNA binding                        | 13.82                         | 0.274    | AFF3, ARNTL, ASCL3, ATAD2, ATF5, ATOH8, ATRX, BATF, BCL6, CEBPD, CITED2, CREBRF, CSRN1, ERCC6, FOSL2, FOXN2, FOXO1, FOXO3, FOXO3B, GLIS3, GZF1, HAND2, HIF3A, HMGB2, IKZF1, IRX3, KLF13, KLF15, KLF2, KLF6, KLF7, KLF9, MAFB, MYEF2, NFIA, NFIB, NFIC, NFIL3, NR2E3, PBX4, PIAS1, POU2AF1, PPARGC1A, RORA, RUNX2, SCML4, SNAPC3, SPEN, STOX1, TBX21, TCF21, TFPC2L1, TFEB, THRA, TOX, TOX2, TOX3, TSC22D3, TSPYL2, TTF1, ZBTB16, ZBTB20, ZBTB38, ZBTB8A, ZFAND5, ZFH3, ZFR, ZHX3, ZNF157, ZNF234, ZNF275, ZNF320, ZNF331, ZNF540, ZNF561, ZNF57, ZNF652, ZNF682, ZNF763, ZNF844                                                                                                                                                                       | 1.08        | 0.9096808        |
| <b>Cluster 5</b>                              | <b>Enrichment Score: 2.89</b> |          |                                                                                                                                                                                                                                                                                                                                                                                                                                                                                                                                                                                                                                                                                                                                                       |             |                  |
| <b>Term</b>                                   | <b>%</b>                      | <b>P</b> |                                                                                                                                                                                                                                                                                                                                                                                                                                                                                                                                                                                                                                                                                                                                                       | <b>Fold</b> | <b>Benjamini</b> |
| GO:0019955~cytokine binding                   | 2.07                          | 6.77E-4  | CMKLR1, CSF1R, CSF2RA, CXCR4, EB13, GFRA1, IL1R1, IL6R, IL6ST, IL7R, LIFR, TGFB3                                                                                                                                                                                                                                                                                                                                                                                                                                                                                                                                                                                                                                                                      | 3.46        | 0.143049         |
| GO:0004896~cytokine receptor activity         | 1.38                          | 0.002    | CSF2RA, EB13, GFRA1, IL1R1, IL6R, IL6ST, IL7R, LIFR                                                                                                                                                                                                                                                                                                                                                                                                                                                                                                                                                                                                                                                                                                   | 4.57        | 0.205317         |
| GO:0019838~growth factor binding              | 1.90                          | 0.002    | CTGF, IGFBP5, IL1R1, IL6R, IL6ST, IL7R, INSR, LIFR, NTRK3, PDGFRA, TGFB3                                                                                                                                                                                                                                                                                                                                                                                                                                                                                                                                                                                                                                                                              | 3.29        | 0.1881942        |
| <b>Cluster 6</b>                              | <b>Enrichment Score: 2.73</b> |          |                                                                                                                                                                                                                                                                                                                                                                                                                                                                                                                                                                                                                                                                                                                                                       |             |                  |
| <b>Term</b>                                   | <b>%</b>                      | <b>P</b> |                                                                                                                                                                                                                                                                                                                                                                                                                                                                                                                                                                                                                                                                                                                                                       | <b>Fold</b> | <b>Benjamini</b> |
| GO:0006468~protein amino acid phosphorylation | 7.77                          | 2.35E-06 | ADRA2C, AKAP9, AKT3, BLK, BMP2, CAMK2B, CIT, CSF1R, CXCR4, DAPK1, ERBB4, ERCC6, F2R, FGD4, FGR, FLT3, GADD45B, GADD45G, HIPK2, INSR, IRAK3, LATS2, MAP3K6, MERTK, MKNK2, NIM1K, NTRK3, PAK3, PDGFRA, PDK4, PRKCA, PTK2B, ROR1, RPS6KA2, RPS6KA5, SGK1, SIK1, SPAG9, TAOK1, TGFB3, TRIO, TXK, UHMK1, WNK1, ZAK                                                                                                                                                                                                                                                                                                                                                                                                                                         | 2.15        | 0.0011307        |
| GO:0006796~phosphate metabolic process        | 10.02                         | 3.12E-06 | ADRA2C, AKAP9, AKT3, ATP6V1C2, BLK, BMP2, CAMK2B, CIT, CSF1R, CXCR4, DAPK1, DUSP1, ENPP1, ENPP3, ERBB4, ERCC6, F2R, FGD4, FGR, FLT3, GADD45B, GADD45G, GNPTAB, HIPK2, INSR, IRAK3, LATS2, MAP3K6, MERTK, MKNK2, NIM1K, NTRK3, PAK3, PDGFRA, PDK4, PIK3R1, PPM1B, PPM1K, PPP1CB, PRKCA, PTK2B, PTPDC1, PTPN5, PTPRG, PTPRM, ROR1, RPS6KA2, RPS6KA5, SGK1, SIK1, SPAG9, TAOK1, TGFB3, TRIO, TXK, UHMK1, WNK1, ZAK                                                                                                                                                                                                                                                                                                                                       | 1.90        | 0.0012524        |
| GO:0006793~phosphate metabolic process        | 10.02                         | 3.12E-06 | ADRA2C, AKAP9, AKT3, ATP6V1C2, BLK, BMP2, CAMK2B, CIT, CSF1R, CXCR4, DAPK1, DUSP1, ENPP1, ENPP3, ERBB4, ERCC6, F2R, FGD4, FGR, FLT3, GADD45B, GADD45G, GNPTAB, HIPK2, INSR, IRAK3, LATS2, MAP3K6, MERTK, MKNK2, NIM1K, NTRK3, PAK3, PDGFRA, PDK4, PIK3R1, PPM1B, PPM1K, PPP1CB, PRKCA, PTK2B, PTPDC1, PTPN5, PTPRG, PTPRM, ROR1, RPS6KA2, RPS6KA5, SGK1, SIK1, SPAG9, TAOK1, TGFB3, TRIO, TXK, UHMK1, WNK1, ZAK                                                                                                                                                                                                                                                                                                                                       | 1.90        | 0.0012524        |
| IPR017441:Protein kinase, ATP binding site    | 5.87                          | 4.06E-06 | AKAP9, AKT3, BLK, CAMK2B, CIT, CSF1R, DAPK1, ERBB4, FGR, FLT3, HIPK2, INSR, IRAK3, LATS2, MAP3K6, MERTK, MKNK2, NIM1K, NTRK3, PAK3, PDGFRA, PRKCA, PTK2B, ROR1, RPS6KA2, RPS6KA5, SGK1, SIK1, TAOK1, TRIO, TXK, UHMK1, WNK1, ZAK                                                                                                                                                                                                                                                                                                                                                                                                                                                                                                                      | 2.45        | 0.0011636        |
| IPR000719:Protein kinase, core                | 5.87                          | 1.05E-05 | AKAP9, AKT3, BLK, CAMK2B, CIT, CSF1R, DAPK1, ERBB4, FGR, FLT3, HIPK2, INSR, IRAK3, LATS2, MAP3K6, MERTK, MKNK2, NIM1K, NTRK3, PAK3, PDGFRA, PRKCA, PTK2B, ROR1, RPS6KA2, RPS6KA5, SGK1, SIK1, TAOK1, TRIO, TXK, UHMK1, WNK1, ZAK                                                                                                                                                                                                                                                                                                                                                                                                                                                                                                                      | 2.34        | 0.0022478        |
| GO:0016310~phosphorylation                    | 8.29                          | 2.32E-05 | ADRA2C, AKAP9, AKT3, ATP6V1C2, BLK, BMP2, CAMK2B, CIT, CSF1R, CXCR4, DAPK1, ERBB4, ERCC6, F2R, FGD4, FGR, FLT3, GADD45B, GADD45G, GNPTAB, HIPK2, INSR, IRAK3, LATS2, MAP3K6, MERTK, MKNK2, NIM1K, NTRK3, PAK3, PDGFRA,                                                                                                                                                                                                                                                                                                                                                                                                                                                                                                                                | 1.91        | 0.0032855        |

|                                                        |       |          |                                                                                                                                                                                                                                                                                                                                                                                                                                                                                                                                                                                                 |      |           |
|--------------------------------------------------------|-------|----------|-------------------------------------------------------------------------------------------------------------------------------------------------------------------------------------------------------------------------------------------------------------------------------------------------------------------------------------------------------------------------------------------------------------------------------------------------------------------------------------------------------------------------------------------------------------------------------------------------|------|-----------|
|                                                        |       |          | PDK4, PIK3R1, PRKCA, PTK2B, ROR1, RPS6KA2, RPS6KA5, SGK1, SIK1, SPAG9, TAOK1, TGFBFR3, TRIO, TXK, UHMK1, WNK1, ZAK                                                                                                                                                                                                                                                                                                                                                                                                                                                                              |      |           |
| GO:0004672~protein kinase activity                     | 6.74  | 4.73E-05 | AKAP13, AKAP9, AKT3, BLK, CAMK2B, CCND3, CIT, CSF1R, DAPK1, ERBB4, FGR, FLT3, HIPK2, INSR, IRAK3, LATS2, MAP3K6, MERTK, MKNK2, NIM1K, NTRK3, PAK3, PDGFRA, PDK4, PHKA1, PRKCA, PTK2B, ROR1, RPS6KA2, RPS6KA5, SGK1, SIK1, TAOK1, TGFBFR3, TRIO, TXK, UHMK1, WNK1, ZAK                                                                                                                                                                                                                                                                                                                           | 2.02 | 0.0160494 |
| GO:0004674~protein serine/threonine kinase activity    | 4.49  | 0.003    | AKAP13, AKAP9, AKT3, CAMK2B, CCND3, CIT, DAPK1, HIPK2, IRAK3, LATS2, MAP3K6, MKNK2, NIM1K, PAK3, PHKA1, PRKCA, RPS6KA2, RPS6KA5, SGK1, SIK1, TAOK1, TGFBFR3, TRIO, UHMK1, WNK1, ZAK                                                                                                                                                                                                                                                                                                                                                                                                             | 1.90 | 0.2040827 |
| IPR008271:Serine/threonine protein kinase, active site | 3.80  | 0.003    | AKAP9, AKT3, CAMK2B, CIT, DAPK1, HIPK2, IRAK3, LATS2, MAP3K6, MKNK2, NIM1K, PAK3, PRKCA, RPS6KA2, RPS6KA5, SGK1, SIK1, TAOK1, TRIO, UHMK1, WNK1, ZAK                                                                                                                                                                                                                                                                                                                                                                                                                                            | 2.03 | 0.2065896 |
| IPR002290:Serine/threonine protein kinase              | 2.94  | 0.006    | AKT3, CAMK2B, CIT, DAPK1, HIPK2, LATS2, MAP3K6, MKNK2, NIM1K, PAK3, PRKCA, RPS6KA2, RPS6KA5, SGK1, SIK1, TAOK1, TRIO                                                                                                                                                                                                                                                                                                                                                                                                                                                                            | 2.15 | 0.3123145 |
| IPR017442:Serine/threonine protein kinase-related      | 3.63  | 0.007    | AKAP9, AKT3, CAMK2B, CIT, DAPK1, HIPK2, IRAK3, LATS2, MAP3K6, MKNK2, NIM1K, PAK3, PRKCA, RPS6KA2, RPS6KA5, SGK1, SIK1, TAOK1, TRIO, UHMK1, WNK1                                                                                                                                                                                                                                                                                                                                                                                                                                                 | 1.91 | 0.3242472 |
| SM00220:S_TKc                                          | 2.94  | 0.017    | AKT3, CAMK2B, CIT, DAPK1, HIPK2, LATS2, MAP3K6, MKNK2, NIM1K, PAK3, PRKCA, RPS6KA2, RPS6KA5, SGK1, SIK1, TAOK1, TRIO                                                                                                                                                                                                                                                                                                                                                                                                                                                                            | 1.90 | 0.427538  |
| GO:0001883~purine nucleoside binding                   | 10.88 | 0.054    | ABCA6, ACSL1, AKAP9, AKT3, AOX1, ATAD2, ATP10A, ATRX, BLK, CAMK2B, CHKA, CIT, CSF1R, DAPK1, DGKG, ENPP1, ERBB4, ERCC6, ETNK2, FGR, FLT3, GLUL, HIPK2, HK1, INSR, IRAK3, LATS2, MAP3K6, MERTK, MKNK2, MYO10, N4BP2, NIM1K, NOX4, NTRK3, P2RX5, PAK3, PAPSS2, PDGFRA, PDK4, PDXK, PFKFB2, PRKCA, PRR15L, PTK2B, RAPGEF3, RHOB, RHOBTB3, ROR1, RPS6KA2, RPS6KA5, RUNX2, SGK1, SIK1, SQLE, TAOK1, TRIO, TXK, UBE2D2, UBE2H, UHMK1, WNK1, ZAK                                                                                                                                                        | 1.24 | 0.7326692 |
| GO:0030554~adenyl nucleotide binding                   | 10.71 | 0.057    | ABCA6, ACSL1, AKAP9, AKT3, AOX1, ATAD2, ATP10A, ATRX, BLK, CAMK2B, CHKA, CIT, CSF1R, DAPK1, DGKG, ENPP1, ERBB4, ERCC6, ETNK2, FGR, FLT3, GLUL, HIPK2, HK1, INSR, IRAK3, LATS2, MAP3K6, MERTK, MKNK2, MYO10, N4BP2, NIM1K, NOX4, NTRK3, P2RX5, PAK3, PAPSS2, PDGFRA, PDK4, PDXK, PFKFB2, PRKCA, PRR15L, PTK2B, RAPGEF3, RHOB, RHOBTB3, ROR1, RPS6KA2, RPS6KA5, RUNX2, SGK1, SIK1, SQLE, TAOK1, TRIO, TXK, UBE2D2, UBE2H, UHMK1, WNK1, ZAK                                                                                                                                                        | 1.24 | 0.7060824 |
| GO:0001882~nucleoside binding                          | 10.88 | 0.062    | ABCA6, ACSL1, AKAP9, AKT3, AOX1, ATAD2, ATP10A, ATRX, BLK, CAMK2B, CHKA, CIT, CSF1R, DAPK1, DGKG, ENPP1, ERBB4, ERCC6, ETNK2, FGR, FLT3, GLUL, HIPK2, HK1, INSR, IRAK3, LATS2, MAP3K6, MERTK, MKNK2, MYO10, N4BP2, NIM1K, NOX4, NTRK3, P2RX5, PAK3, PAPSS2, PDGFRA, PDK4, PDXK, PFKFB2, PRKCA, PRR15L, PTK2B, RAPGEF3, RHOB, RHOBTB3, ROR1, RPS6KA2, RPS6KA5, RUNX2, SGK1, SIK1, SQLE, TAOK1, TRIO, TXK, UBE2D2, UBE2H, UHMK1, WNK1, ZAK                                                                                                                                                        | 1.23 | 0.7109499 |
| GO:0032559~adenyl ribonucleotide binding               | 10.19 | 0.062    | ABCA6, ACSL1, AKAP9, AKT3, ATAD2, ATP10A, ATRX, BLK, CAMK2B, CHKA, CIT, CSF1R, DAPK1, DGKG, ENPP1, ERBB4, ERCC6, ETNK2, FGR, FLT3, GLUL, HIPK2, HK1, INSR, IRAK3, LATS2, MAP3K6, MERTK, MKNK2, MYO10, N4BP2, NIM1K, NTRK3, P2RX5, PAK3, PAPSS2, PDGFRA, PDK4, PDXK, PFKFB2, PRKCA, PRR15L, PTK2B, RAPGEF3, RHOB, RHOBTB3, ROR1, RPS6KA2, RPS6KA5, RUNX2, SGK1, SIK1, TAOK1, TRIO, TXK, UBE2D2, UBE2H, UHMK1, WNK1, ZAK                                                                                                                                                                          | 1.24 | 0.7022977 |
| GO:0005524~ATP binding                                 | 10.02 | 0.068    | ABCA6, ACSL1, AKAP9, AKT3, ATAD2, ATP10A, ATRX, BLK, CAMK2B, CHKA, CIT, CSF1R, DAPK1, DGKG, ENPP1, ERBB4, ERCC6, ETNK2, FGR, FLT3, GLUL, HIPK2, HK1, INSR, IRAK3, LATS2, MAP3K6, MERTK, MKNK2, MYO10, N4BP2, NIM1K, NTRK3, P2RX5, PAK3, PAPSS2, PDGFRA, PDK4, PDXK, PFKFB2, PRKCA, PRR15L, PTK2B, RHOB, RHOBTB3, ROR1, RPS6KA2, RPS6KA5, RUNX2, SGK1, SIK1, TAOK1, TRIO, TXK, UBE2D2, UBE2H, UHMK1, WNK1, ZAK                                                                                                                                                                                   | 1.23 | 0.699918  |
| GO:0017076~purine nucleotide binding                   | 12.44 | 0.088    | ABCA6, ACSL1, AKAP9, AKT3, AOX1, ARL4A, ATAD2, ATP10A, ATRX, BLK, CAMK2B, CHKA, CIT, CSF1R, DAPK1, DGKG, ENPP1, ERBB4, ERCC6, ETNK2, FGR, FLT3, GIMAP1, GLUL, HCAR2, HCAR3, HIPK2, HK1, INSR, IRAK3, LATS2, MAP3K6, MERTK, MKNK2, MYO10, N4BP2, NIM1K, NMUR2, NOX4, NTRK3, P2RX5, PAK3, PAPSS2, PDGFRA, PDK4, PDXK, PFKFB2, PRKCA, PRR15L, PTK2B, RAB31, RAB40A, RAB8B, RAPGEF3, RHOB, RHOBTB3, RHOU, ROR1, RPS6KA2, RPS6KA5, RRAGD, RUNX2, SGK1, SIK1, SQLE, TAOK1, TRIO, TXK, UBE2D2, UBE2H, UHMK1, WNK1, ZAK                                                                                 | 1.18 | 0.7476594 |
| GO:0000166~nucleotide binding                          | 14.34 | 0.090    | ABCA6, ACSL1, AKAP9, AKT3, AOX1, ARL4A, ATAD2, ATP10A, ATRX, BLK, CAMK2B, CELF2, CELF6, CHKA, CIT, CRY2, CSF1R, DAPK1, DGKG, ENPP1, ERBB4, ERCC6, ETNK2, FGR, FLT3, GIMAP1, GLUL, HCAR2, HCAR3, HIPK2, HK1, HSD11B2, INSR, IRAK3, LATS2, MAP3K6, MERTK, MKNK2, MYEF2, MYO10, N4BP2, NIM1K, NMUR2, NOX4, NTRK3, P2RX5, PAK3, PAPSS2, PDGFRA, PDK4, PDXK, PFKFB2, PPARGC1A, PRKCA, PRR15L, PTK2B, RAB31, RAB40A, RAB8B, RAPGEF3, RBMS3, RHOB, RHOBTB3, RHOU, RNPC3, ROR1, RPS6KA2, RPS6KA5, RRAGD, RUNX2, SGK1, SIK1, SORD, SPEN, SQLE, TAOK1, TP53I3, TRIO, TXK, UBE2D2, UBE2H, UHMK1, WNK1, ZAK | 1.16 | 0.7464741 |
| GO:0032553~ribonucleotide binding                      | 11.92 | 0.096    | ABCA6, ACSL1, AKAP9, AKT3, ARL4A, ATAD2, ATP10A, ATRX, BLK, CAMK2B, CHKA, CIT, CSF1R, DAPK1, DGKG, ENPP1, ERBB4, ERCC6, ETNK2, FGR, FLT3, GIMAP1, GLUL, HCAR2, HCAR3, HIPK2, HK1, INSR, IRAK3, LATS2, MAP3K6, MERTK, MKNK2, MYO10, N4BP2, NIM1K, NMUR2, NTRK3, P2RX5, PAK3, PAPSS2, PDGFRA, PDK4, PDXK, PFKFB2, PRKCA, PRR15L, PTK2B, RAB31, RAB40A, RAB8B, RAPGEF3, RHOB, RHOBTB3, RHOU, ROR1, RPS6KA2, RPS6KA5, RRAGD, RUNX2, SGK1, SIK1, TAOK1, TRIO, TXK, UBE2D2, UBE2H, UHMK1, WNK1, ZAK                                                                                                   | 1.18 | 0.7539376 |

|                                                                                                         |                               |          |                                                                                                                                                                                                                                                                                                                                                                                                                                                                                             |             |                  |
|---------------------------------------------------------------------------------------------------------|-------------------------------|----------|---------------------------------------------------------------------------------------------------------------------------------------------------------------------------------------------------------------------------------------------------------------------------------------------------------------------------------------------------------------------------------------------------------------------------------------------------------------------------------------------|-------------|------------------|
| GO:0032555~purine ribonucleotide binding                                                                | 11.92                         | 0.096    | ABCA6, ACSL1, AKAP9, AKT3, ARL4A, ATAD2, ATP10A, ATRX, BLK, CAMK2B, CHKA, CIT, CSF1R, DAPK1, DGKG, ENPP1, ERBB4, ERCC6, ETNK2, FGR, FLT3, GIMAP1, GLUL, HCAR2, HCAR3, HIPK2, HK1, INSR, IRAK3, LATS2, MAP3K6, MERTK, MKNK2, MYO10, N4BP2, NIM1K, NMUR2, NTRK3, P2RX5, PAK3, PAPSS2, PDGFRA, PDK4, PDXK, PFKFB2, PRKCA, PRR15L, PTK2B, RAB31, RAB40A, RAB8B, RAPGEF3, RHOB, RHOTB3, RHO, ROR1, RPS6KA2, RPS6KA5, RRAGD, RUNX2, SGK1, SIK1, TAOK1, TRIO, TXK, UBE2D2, UBE2H, UHMK1, WNK1, ZAK | 1.18        | 0.7539376        |
| <b>Cluster 7</b>                                                                                        | <b>Enrichment Score: 2.72</b> |          |                                                                                                                                                                                                                                                                                                                                                                                                                                                                                             |             |                  |
| <b>Term</b>                                                                                             | <b>%</b>                      | <b>P</b> |                                                                                                                                                                                                                                                                                                                                                                                                                                                                                             | <b>Fold</b> | <b>Benjamini</b> |
| GO:0010558~negative regulation of macromolecule biosynthetic process                                    | 6.39                          | 2.16E-05 | ANKHD1, ANKHD1-EIF4EBP3, APBB1, BCL6, BMP2, CDKN1C, CITED2, EIF4EBP3, ENPP1, GLIS3, GMNN, GZF1, HIPK2, HMGB2, IGFBP5, IKZF1, IL6R, INHBA, INHBB, MGEA5, NFIC, NR2E3, PER1, PRKCA, PRR15L, RUNX2, SIK1, SLA2, SPEN, TCF21, TFPC2L1, THRA, TNFSF4, TSPYL2, TTF1, ZBTB16, ZFH3, ZHX3, ZNF157                                                                                                                                                                                                   | 2.15        | 0.0032453        |
| GO:0009890~negative regulation of biosynthetic process                                                  | 6.56                          | 2.52E-05 | ANKHD1, ANKHD1-EIF4EBP3, APBB1, BCL6, BMP2, CDKN1C, CITED2, EIF4EBP3, ENPP1, GIMAP1, GLIS3, GMNN, GZF1, HIPK2, HMGB2, IGFBP5, IKZF1, IL6R, INHBA, INHBB, MGEA5, NFIC, NR2E3, PER1, PRKCA, PRR15L, RUNX2, SIK1, SLA2, SPEN, TCF21, TFPC2L1, THRA, TNFSF4, TSPYL2, TTF1, ZBTB16, ZFH3, ZHX3, ZNF157                                                                                                                                                                                           | 2.11        | 0.0033638        |
| GO:0006357~regulation of transcription from RNA polymerase II promoter                                  | 7.60                          | 4.45E-05 | APBB1, ARNTL, ASCL3, ATF5, ATXN7, BCL6, BMP2, CDKN1C, CITED2, CSRNP1, FOSL2, FOXO1, FOXO3, FOXO3B, GLIS3, GZF1, HAND2, HIPK2, HMGB2, IGF1, IKZF1, INHBA, KLF13, KLF6, KLF7, KLF9, MAFB, NFIB, NFIC, NFKBIA, NR2E3, PPARGC1A, RORA, RUNX2, SIK1, SLA2, SMARCD2, SPEN, TFPC2L1, TFEB, THRA, TTF1, ZBTB38, ZFH3, ZNF157                                                                                                                                                                        | 1.93        | 0.005101         |
| GO:0031327~negative regulation of cellular biosynthetic process                                         | 6.22                          | 8.30E-05 | ANKHD1, ANKHD1-EIF4EBP3, BCL6, BMP2, CDKN1C, CITED2, EIF4EBP3, ENPP1, GIMAP1, GLIS3, GMNN, GZF1, HIPK2, HMGB2, IGFBP5, IKZF1, INHBA, INHBB, MGEA5, NFIC, NR2E3, PER1, PRKCA, PRR15L, RUNX2, SIK1, SLA2, SPEN, TCF21, TFPC2L1, THRA, TNFSF4, TSPYL2, TTF1, ZBTB16, ZFH3, ZHX3, ZNF157                                                                                                                                                                                                        | 2.04        | 0.0083062        |
| GO:0010605~negative regulation of macromolecule metabolic process                                       | 6.91                          | 8.55E-4  | ANKHD1, ANKHD1-EIF4EBP3, APBB1, BCL6, BMP2, BNIP3, CDKN1C, CITED2, EIF4EBP3, ENPP1, GLIS3, GMNN, GZF1, HIPK2, HMGB2, IGFBP5, IKZF1, IL6R, INHBA, INHBB, INSR, IRAK3, MGEA5, NFIC, NR2E3, PER1, PRKCA, PRR15L, RUNX2, SIK1, SLA2, SPEN, TCF21, TFPC2L1, THRA, TNFSF4, TSPYL2, TTF1, ZBTB16, ZFH3, ZHX3, ZNF157                                                                                                                                                                               | 1.73        | 0.0448267        |
| GO:0051172~negative regulation of nitrogen compound metabolic process                                   | 5.01                          | 0.004    | BCL6, BMP2, CDKN1C, CITED2, GIMAP1, GLIS3, GMNN, GZF1, HIPK2, HMGB2, IKZF1, NFIC, NR2E3, PER1, PRR15L, RUNX2, SIK1, SLA2, SPEN, TCF21, TFPC2L1, THRA, TNFSF4, TSPYL2, TTF1, ZBTB16, ZFH3, ZHX3, ZNF157                                                                                                                                                                                                                                                                                      | 1.78        | 0.1326702        |
| GO:0045934~negative regulation of nucleobase, nucleoside, nucleotide and nucleic acid metabolic process | 4.84                          | 0.006    | BCL6, BMP2, CDKN1C, CITED2, GLIS3, GMNN, GZF1, HIPK2, HMGB2, IKZF1, NFIC, NR2E3, PER1, PRR15L, RUNX2, SIK1, SLA2, SPEN, TCF21, TFPC2L1, THRA, TNFSF4, TSPYL2, TTF1, ZBTB16, ZFH3, ZHX3, ZNF157                                                                                                                                                                                                                                                                                              | 1.74        | 0.1704511        |
| GO:0010629~negative regulation of gene expression                                                       | 4.66                          | 0.009    | BCL6, BMP2, BNIP3, CDKN1C, CITED2, GLIS3, GZF1, HIPK2, HMGB2, IKZF1, INSR, NFIC, NR2E3, PER1, PRR15L, RUNX2, SIK1, SLA2, SPEN, TCF21, TFPC2L1, THRA, TNFSF4, ZBTB16, ZFH3, ZHX3, ZNF157                                                                                                                                                                                                                                                                                                     | 1.71        | 0.209036         |
| GO:0016481~negative regulation of transcription                                                         | 4.32                          | 0.010    | BCL6, BMP2, CDKN1C, CITED2, GLIS3, GZF1, HIPK2, HMGB2, IKZF1, NFIC, NR2E3, PER1, PRR15L, RUNX2, SIK1, SLA2, SPEN, TCF21, TFPC2L1, THRA, TNFSF4, ZBTB16, ZFH3, ZHX3, ZNF157                                                                                                                                                                                                                                                                                                                  | 1.73        | 0.2208939        |
| GO:0045892~negative regulation of transcription, DNA-dependent                                          | 3.45                          | 0.017    | BCL6, BMP2, CDKN1C, CITED2, GLIS3, GZF1, HIPK2, IKZF1, NFIC, NR2E3, SIK1, SLA2, SPEN, TCF21, TFPC2L1, TNFSF4, ZBTB16, ZFH3, ZHX3, ZNF157                                                                                                                                                                                                                                                                                                                                                    | 1.79        | 0.2866933        |
| GO:0051253~negative regulation of RNA metabolic process                                                 | 3.45                          | 0.020    | BCL6, BMP2, CDKN1C, CITED2, GLIS3, GZF1, HIPK2, IKZF1, NFIC, NR2E3, SIK1, SLA2, SPEN, TCF21, TFPC2L1, TNFSF4, ZBTB16, ZFH3, ZHX3, ZNF157                                                                                                                                                                                                                                                                                                                                                    | 1.76        | 0.3155051        |
| GO:0016564~transcription repressor activity                                                             | 2.94                          | 0.045    | ATF5, BCL6, BMP2, CDKN1C, CITED2, HIPK2, HMGB2, IKZF1, NFIL3, PIAS1, SIK1, SPEN, TFPC2L1, THRA, TOB1, ZBTB16, ZFH3                                                                                                                                                                                                                                                                                                                                                                          | 1.69        | 0.715361         |
| GO:0000122~negative regulation of transcription from RNA polymerase II promoter                         | 2.42                          | 0.076    | BCL6, CDKN1C, CITED2, GLIS3, GZF1, HIPK2, IKZF1, NFIC, NR2E3, SIK1, SLA2, TFPC2L1, ZFH3, ZNF157                                                                                                                                                                                                                                                                                                                                                                                             | 1.68        | 0.5572789        |
| <b>Cluster 8</b>                                                                                        | <b>Enrichment Score: 2.63</b> |          |                                                                                                                                                                                                                                                                                                                                                                                                                                                                                             |             |                  |
| <b>Term</b>                                                                                             | <b>%</b>                      | <b>P</b> |                                                                                                                                                                                                                                                                                                                                                                                                                                                                                             | <b>Fold</b> | <b>Benjamini</b> |
| GO:0010033~response to organic substance                                                                | 7.43                          | 7.81E-05 | ACSL1, BAIAP2, C1QB, CA4, CALCOCO2, COL4A3, DUSP1, ENPP1, ERBB4, F2R, FOXO1, GLUL, HMGB2, HSD11B2, IL1R1, IL6R, IL6ST, INSR, IRAK3, IRS2, LATS2, LIFR, LOX, LPIN1, MAP1B, MCL1, MGEA5, NFKBIA, NMUR2, PDGFRA, PFKFB2, PIK3R1, PLIN2, PRKCA, PTK2B, SERPINF2, SLC6A1, SQLE, TAT, TG, TGFB3, THRA, TLR2                                                                                                                                                                                       | 1.90        | 0.0081559        |

|                                                    |                               |          |                                                                                                                                                                                                                                                                                                                                                                                                                                                                                                                                                                                                                                                                                                                                                                                                                                                                                                                                                                                                                                   |             |                  |
|----------------------------------------------------|-------------------------------|----------|-----------------------------------------------------------------------------------------------------------------------------------------------------------------------------------------------------------------------------------------------------------------------------------------------------------------------------------------------------------------------------------------------------------------------------------------------------------------------------------------------------------------------------------------------------------------------------------------------------------------------------------------------------------------------------------------------------------------------------------------------------------------------------------------------------------------------------------------------------------------------------------------------------------------------------------------------------------------------------------------------------------------------------------|-------------|------------------|
| GO:0009725~response to hormone stimulus            | 4.32                          | 5.63E-4  | BAIAP2, C1QB, CA4, DUSP1, ENPP1, ERBB4, FOXO1, HMGB2, HSD11B2, IL6R, INSR, IRS2, LATS2, LOX, LPIN1, MAP1B, MGEA5, PDGFRA, PIK3R1, PRKCA, PTK2B, SLC6A1, TAT, TGFB3, THRA                                                                                                                                                                                                                                                                                                                                                                                                                                                                                                                                                                                                                                                                                                                                                                                                                                                          | 2.17        | 0.034223         |
| GO:0009719~response to endogenous stimulus         | 4.32                          | 0.002    | BAIAP2, C1QB, CA4, DUSP1, ENPP1, ERBB4, FOXO1, HMGB2, HSD11B2, IL6R, INSR, IRS2, LATS2, LOX, LPIN1, MAP1B, MGEA5, PDGFRA, PIK3R1, PRKCA, PTK2B, SLC6A1, TAT, TGFB3, THRA                                                                                                                                                                                                                                                                                                                                                                                                                                                                                                                                                                                                                                                                                                                                                                                                                                                          | 1.96        | 0.0952617        |
| GO:0048545~response to steroid hormone stimulus    | 2.59                          | 0.003    | C1QB, CA4, DUSP1, ERBB4, HMGB2, HSD11B2, IL6R, INSR, LOX, MAP1B, MGEA5, PDGFRA, PRKCA, SLC6A1, TAT                                                                                                                                                                                                                                                                                                                                                                                                                                                                                                                                                                                                                                                                                                                                                                                                                                                                                                                                | 2.49        | 0.1169206        |
| GO:0043434~response to peptide hormone stimulus    | 1.90                          | 0.023    | BAIAP2, ENPP1, FOXO1, HSD11B2, IL6R, INSR, IRS2, LPIN1, MAP1B, PIK3R1, PRKCA                                                                                                                                                                                                                                                                                                                                                                                                                                                                                                                                                                                                                                                                                                                                                                                                                                                                                                                                                      | 2.27        | 0.3345707        |
| GO:0032870~cellular response to hormone stimulus   | 1.73                          | 0.024    | BAIAP2, DUSP1, ENPP1, FOXO1, INSR, IRS2, LATS2, LPIN1, PIK3R1, THRA                                                                                                                                                                                                                                                                                                                                                                                                                                                                                                                                                                                                                                                                                                                                                                                                                                                                                                                                                               | 2.39        | 0.338967         |
| <b>Cluster 9</b>                                   | <b>Enrichment Score: 2.57</b> |          |                                                                                                                                                                                                                                                                                                                                                                                                                                                                                                                                                                                                                                                                                                                                                                                                                                                                                                                                                                                                                                   |             |                  |
| <b>Term</b>                                        | <b>%</b>                      | <b>P</b> |                                                                                                                                                                                                                                                                                                                                                                                                                                                                                                                                                                                                                                                                                                                                                                                                                                                                                                                                                                                                                                   | <b>Fold</b> | <b>Benjamini</b> |
| PIRSF000384:PNMTase                                | 0.52                          | 0.003    | INMT, NNMT, PNMT                                                                                                                                                                                                                                                                                                                                                                                                                                                                                                                                                                                                                                                                                                                                                                                                                                                                                                                                                                                                                  | 33.02       | 0.2927969        |
| PIRSF000384:phenylethanolamine N-methyltransferase | 0.52                          | 0.003    | INMT, NNMT, PNMT                                                                                                                                                                                                                                                                                                                                                                                                                                                                                                                                                                                                                                                                                                                                                                                                                                                                                                                                                                                                                  | 33.02       | 0.2927969        |
| IPR000940:Methyltransferase, NNMT/PNMT/TEMT        | 0.52                          | 0.003    | INMT, NNMT, PNMT                                                                                                                                                                                                                                                                                                                                                                                                                                                                                                                                                                                                                                                                                                                                                                                                                                                                                                                                                                                                                  | 32.73       | 0.209369         |
| <b>Cluster 10</b>                                  | <b>Enrichment Score: 2.47</b> |          |                                                                                                                                                                                                                                                                                                                                                                                                                                                                                                                                                                                                                                                                                                                                                                                                                                                                                                                                                                                                                                   |             |                  |
| <b>Term</b>                                        | <b>%</b>                      | <b>P</b> |                                                                                                                                                                                                                                                                                                                                                                                                                                                                                                                                                                                                                                                                                                                                                                                                                                                                                                                                                                                                                                   | <b>Fold</b> | <b>Benjamini</b> |
| GO:0031226~intrinsic to plasma membrane            | 9.67                          | 0.001    | ADCYAP1R1, ADORA3, ADRA2C, ANPEP, C3AR1, CD160, CD163, CD302, CD84, CMKLR1, CNR1, CORIN, CSF1R, CSF2RA, CXCR4, ENPP3, F2R, F3, FLT3, GPIHBP1, GPR34, HCAR2, HCAR3, IL1R1, IL6R, IL6ST, INSR, ITGA10, ITGA5, ITGB1, KCNB1, LIFR, LILRB3, MERTK, MRC1, MSR1, NINJ2, NPY2R, NRXN3, NTRK3, P2RX5, PDGFRA, PTPRG, PTPRM, ROR1, RTN4RL1, SLC26A2, SLC29A2, SLC31A2, SLC6A1, SLC7A8, STOM, TGFB3, TLR2, TNFSF4, TPO, TRPM2                                                                                                                                                                                                                                                                                                                                                                                                                                                                                                                                                                                                               | 1.53        | 0.1244671        |
| GO:0044459~plasma membrane part                    | 15.20                         | 0.003    | ADCYAP1R1, ADORA3, ADRA2C, AKAP7, ANPEP, ARHGAP26, C3AR1, CA4, CD160, CD163, CD302, CD84, CD86, CLDN8, CMKLR1, CNR1, CORIN, CSF1R, CSF2RA, CXCR4, CYFIP2, ENPP1, ENPP3, EPB41L5, ERBB4, F2R, F3, FERMT2, FLT3, FNBP1, FNBP1L, GPIHBP1, GPR34, HCAR2, HCAR3, HOMER2, IL1R1, IL6R, IL6ST, IL7R, INSR, ITGA10, ITGA5, ITGB1, KCNB1, KLRD1, LAMA3, LAMB1, LIFR, LILRB3, MAOA, MERTK, MRC1, MSR1, NINJ2, NOX4, NPY2R, NRXN3, NTRK3, P2RX5, PDGFRA, PHKA1, PKP2, PTK2B, PTPRG, PTPRM, RAB31, RAB40A, RAB8B, RHOU, ROR1, RTN4RL1, SCNN1A, SHROOM3, SLC16A10, SLC26A2, SLC29A2, SLC31A2, SLC6A1, SLC7A8, SNTG2, STOM, TENC1, TGFB3, TLR2, TMEM204, TNFSF4, TPO, TRPM2                                                                                                                                                                                                                                                                                                                                                                     | 1.33        | 0.2273889        |
| GO:0005887~integral to plasma membrane             | 8.98                          | 0.005    | ADCYAP1R1, ADORA3, ADRA2C, ANPEP, C3AR1, CD163, CD302, CD84, CMKLR1, CNR1, CORIN, CSF1R, CSF2RA, CXCR4, ENPP3, F2R, FLT3, GPR34, HCAR2, HCAR3, IL1R1, IL6R, IL6ST, INSR, ITGA10, ITGA5, ITGB1, KCNB1, LIFR, LILRB3, MERTK, MRC1, MSR1, NINJ2, NPY2R, NRXN3, NTRK3, P2RX5, PDGFRA, PTPRG, PTPRM, ROR1, SLC26A2, SLC29A2, SLC31A2, SLC6A1, SLC7A8, STOM, TGFB3, TLR2, TNFSF4, TPO, TRPM2                                                                                                                                                                                                                                                                                                                                                                                                                                                                                                                                                                                                                                            | 1.46        | 0.198527         |
| GO:0005886~plasma membrane                         | 23.66                         | 0.006    | ACSL1, ADCYAP1R1, ADORA3, ADRA2C, AKAP7, ANPEP, APBA2, APBB1, APOLD1, ARHGAP10, ARHGAP26, BAIAP2, C3AR1, CA4, CALD1, CD160, CD163, CD302, CD53, CD84, CD86, CLDN8, CMKLR1, CNR1, CORIN, CPM, CSF1R, CSF2RA, CTGF, CXCR4, CYFIP2, DIO3, EB13, ELMO1, ENPP1, ENPP3, EPB41L5, ERBB4, F2R, F3, FCGR2B, FCRL5, FERMT2, FLT3, FLVCR2, FNBP1, FNBP1L, FZD7, GFRA1, GGT5, GPIHBP1, GPR133, GPR34, HCAR2, HCAR3, HOMER2, IL1R1, IL6R, IL6ST, IL7R, INSR, IRS2, ITGA10, ITGA5, ITGB1, KCNB1, KLRD1, LAIR1, LAMA2, LAMA3, LAMB1, LDLRAD4, LIFR, LILRB3, LPL, MAOA, MAP1B, MERTK, MRC1, MSR1, MTUS1, NDRG1, NFIA, NINJ2, NMUR2, NOX4, NPY2R, NRXN3, NTRK3, OR7A5, P2RX5, PDGFRA, PHKA1, PKP2, PLIN2, PPP1R16B, PRKCA, PTK2B, PTPRG, PTPRM, RAB31, RAB40A, RAB8B, RFTN2, RGS1, RHOB, RHOU, ROR1, RTN4RL1, SCNN1A, SGK1, SHROOM3, SIGLEC10, SLA2, SLAMF6, SLC16A10, SLC16A12, SLC16A14, SLC19A2, SLC26A2, SLC29A2, SLC31A2, SLC38A1, SLC4A7, SLC6A1, SLC7A8, SLIT2, SNTG2, STOM, TENC1, TGFB3, TLR2, TMEM204, TNFSF4, TPO, TRPM2, VSIG4, ZBTB16 | 1.21        | 0.1996784        |
| <b>Cluster 11</b>                                  | <b>Enrichment Score: 2.33</b> |          |                                                                                                                                                                                                                                                                                                                                                                                                                                                                                                                                                                                                                                                                                                                                                                                                                                                                                                                                                                                                                                   |             |                  |
| <b>Term</b>                                        | <b>%</b>                      | <b>P</b> |                                                                                                                                                                                                                                                                                                                                                                                                                                                                                                                                                                                                                                                                                                                                                                                                                                                                                                                                                                                                                                   | <b>Fold</b> | <b>Benjamini</b> |
| hsa05222:Small cell lung cancer                    | 1.73                          | 0.002    | AKT3, BIRC3, ITGB1, LAMA2, LAMA3, LAMB1, NFKBIA, PIAS1, PIK3R1, PIK3R5                                                                                                                                                                                                                                                                                                                                                                                                                                                                                                                                                                                                                                                                                                                                                                                                                                                                                                                                                            | 3.38        | 0.1672441        |
| hsa04510:Focal adhesion                            | 2.76                          | 0.004    | AKT3, BIRC3, CCND3, IGF1, ITGA10, ITGA5, ITGB1, LAMA2, LAMA3, LAMB1, PAK3, PDGFRA, PIK3R1, PIK3R5, PPP1CB, PRKCA                                                                                                                                                                                                                                                                                                                                                                                                                                                                                                                                                                                                                                                                                                                                                                                                                                                                                                                  | 2.26        | 0.1893609        |
| hsa05200:Pathways in cancer                        | 3.63                          | 0.010    | AKT3, BIRC3, BMP2, CSF1R, CSF2RA, DAPK1, FLT3, FOXO1, FZD7, IGF1, ITGB1, LAMA2, LAMA3, LAMB1, NFKBIA, PDGFRA, PIAS1, PIK3R1, PIK3R5, PRKCA, ZBTB16                                                                                                                                                                                                                                                                                                                                                                                                                                                                                                                                                                                                                                                                                                                                                                                                                                                                                | 1.82        | 0.1703425        |
| <b>Cluster 12</b>                                  | <b>Enrichment Score: 2.32</b> |          |                                                                                                                                                                                                                                                                                                                                                                                                                                                                                                                                                                                                                                                                                                                                                                                                                                                                                                                                                                                                                                   |             |                  |
| <b>Term</b>                                        | <b>%</b>                      | <b>P</b> |                                                                                                                                                                                                                                                                                                                                                                                                                                                                                                                                                                                                                                                                                                                                                                                                                                                                                                                                                                                                                                   | <b>Fold</b> | <b>Benjamini</b> |

|                                                                    |                               |          |                                                                                                                                                                                                                                |             |                  |
|--------------------------------------------------------------------|-------------------------------|----------|--------------------------------------------------------------------------------------------------------------------------------------------------------------------------------------------------------------------------------|-------------|------------------|
| GO:0009611~response to wounding                                    | 5.18                          | 0.003    | ADORA3, AOX1, BMP2, C1QB, C3AR1, CD163, CD302, CHST4, CTGF, CXCL13, CXCR4, F2R, F3, IGF1, IL6R, ITGA5, KLF6, LOX, MAP1B, MGLL, NINJ2, NOX4, PAPS2, PDGFRA, RTN4RL1, SAA1, SERPINF2, TLR2, TNFSF4, VSIG4                        | 1.80        | 0.1072997        |
| GO:0006952~defense response                                        | 5.53                          | 0.006    | ADORA3, AOX1, BMP2, BNIP3, C1QB, C3AR1, CALCOCO2, CD160, CD163, CD302, CD84, CHST4, CXCL13, CXCR4, F2R, F3, FGR, IL1R1, IL6R, INHBA, INHBB, ITGB1, LILRB3, MGLL, NOX4, RNASE6, SAA1, SAMHD1, SERPINF2, TLR2, TNFSF4, VSIG4     | 1.66        | 0.1743949        |
| GO:0006954~inflammatory response                                   | 3.45                          | 0.007    | ADORA3, AOX1, BMP2, C1QB, C3AR1, CD163, CD302, CHST4, CXCL13, CXCR4, F2R, F3, IL6R, MGLL, NOX4, SAA1, SERPINF2, TLR2, TNFSF4, VSIG4                                                                                            | 1.96        | 0.1850373        |
| <b>Cluster 13</b>                                                  | <b>Enrichment Score: 2.27</b> |          |                                                                                                                                                                                                                                |             |                  |
| <b>Term</b>                                                        | <b>%</b>                      | <b>P</b> |                                                                                                                                                                                                                                | <b>Fold</b> | <b>Benjamini</b> |
| GO:0005912~adherens junction                                       | 2.59                          | 2.33E-4  | ARHGAP26, EPB41L5, FERMT2, ITGA5, ITGB1, LAMA3, NOX4, NPY2R, PKP2, PTK2B, PTPRM, RHOU, SHROOM3, TENC1, TMEM204                                                                                                                 | 3.22        | 0.0728512        |
| GO:0070161~anchoring junction                                      | 2.59                          | 6.72E-14 | ARHGAP26, EPB41L5, FERMT2, ITGA5, ITGB1, LAMA3, NOX4, NPY2R, PKP2, PTK2B, PTPRM, RHOU, SHROOM3, TENC1, TMEM204                                                                                                                 | 2.90        | 0.1034194        |
| GO:0005925~focal adhesion                                          | 1.73                          | 0.003    | ARHGAP26, FERMT2, ITGA5, ITGB1, LAMA3, NOX4, NPY2R, PTK2B, RHOU, TENC1                                                                                                                                                         | 3.26        | 0.2033434        |
| GO:0005924~cell-substrate adherens junction                        | 1.73                          | 0.005    | ARHGAP26, FERMT2, ITGA5, ITGB1, LAMA3, NOX4, NPY2R, PTK2B, RHOU, TENC1                                                                                                                                                         | 3.14        | 0.1893378        |
| GO:0030055~cell-substrate junction                                 | 1.73                          | 0.006    | ARHGAP26, FERMT2, ITGA5, ITGB1, LAMA3, NOX4, NPY2R, PTK2B, RHOU, TENC1                                                                                                                                                         | 2.97        | 0.1898816        |
| GO:0016323~basolateral plasma membrane                             | 2.25                          | 0.019    | ARHGAP26, ENPP1, ERBB4, FERMT2, ITGA5, ITGB1, LAMA3, NOX4, NPY2R, PTK2B, RHOU, SLC16A10, TENC1                                                                                                                                 | 2.13        | 0.3451429        |
| GO:0030054~cell junction                                           | 3.11                          | 0.391    | ARHGAP26, CLDN8, CYFIP2, EPB41L5, FERMT2, HOMER2, ITGA5, ITGB1, LAMA3, NOX4, NPY2R, PKP2, PTK2B, PTPRM, RHOU, SHROOM3, TENC1, TMEM204                                                                                          | 1.16        | 0.9440095        |
| <b>Cluster 14</b>                                                  | <b>Enrichment Score: 2.21</b> |          |                                                                                                                                                                                                                                |             |                  |
| <b>Term</b>                                                        | <b>%</b>                      | <b>P</b> |                                                                                                                                                                                                                                | <b>Fold</b> | <b>Benjamini</b> |
| IPR017892:Protein kinase, C-terminal                               | 1.21                          | 0.001    | AKT3, CIT, LATS2, PRKCA, RPS6KA2, RPS6KA5, SGK1                                                                                                                                                                                | 5.73        | 0.1249849        |
| IPR002290:Serine/threonine protein kinase                          | 2.94                          | 0.006    | AKT3, CAMK2B, CIT, DAPK1, HIPK2, LATS2, MAP3K6, MKNK2, NIM1K, PAK3, PRKCA, RPS6KA2, RPS6KA5, SGK1, SIK1, TAOK1, TRIO                                                                                                           | 2.15        | 0.3123145        |
| IPR000961:AGC-kinase, C-terminal                                   | 1.21                          | 0.006    | AKT3, CIT, LATS2, PRKCA, RPS6KA2, RPS6KA5, SGK1                                                                                                                                                                                | 4.17        | 0.3074952        |
| SM00133:S_TK_X                                                     | 1.21                          | 0.011    | AKT3, CIT, LATS2, PRKCA, RPS6KA2, RPS6KA5, SGK1                                                                                                                                                                                | 3.68        | 0.3514453        |
| SM00220:S_TKc                                                      | 2.94                          | 0.017    | AKT3, CAMK2B, CIT, DAPK1, HIPK2, LATS2, MAP3K6, MKNK2, NIM1K, PAK3, PRKCA, RPS6KA2, RPS6KA5, SGK1, SIK1, TAOK1, TRIO                                                                                                           | 1.90        | 0.427538         |
| <b>Cluster 15</b>                                                  | <b>Enrichment Score: 2.08</b> |          |                                                                                                                                                                                                                                |             |                  |
| <b>Term</b>                                                        | <b>%</b>                      | <b>P</b> |                                                                                                                                                                                                                                | <b>Fold</b> | <b>Benjamini</b> |
| GO:0019899~enzyme binding                                          | 5.18                          | 0.003    | AKAP7, ARG2, ARHGAP6, CABYR, CCND3, F3, FGD4, FLT3, FOXO3, FOXO3B, IL6R, INSR, IRS2, LAMB1, MYRIP, NFKBIA, PAK3, PFKFB2, PIAS1, PIK3R1, PPP1CB, PPP1R16B, PRKAB1, PTK2B, RAB31P, RHOBTB3, RPH3AL, SERPINF2, SPAG9, TAOK1, ZFH3 | 1.80        | 0.2185249        |
| GO:0019900~kinase binding                                          | 2.25                          | 0.012    | AKAP7, CABYR, CCND3, FLT3, FOXO3, FOXO3B, INSR, IRS2, PFKFB2, PPP1CB, PRKAB1, PTK2B, SPAG9, TAOK1                                                                                                                              | 2.28        | 0.3982653        |
| GO:0019901~protein kinase binding                                  | 1.90                          | 0.019    | AKAP7, CABYR, CCND3, FOXO3, FOXO3B, INSR, IRS2, PPP1CB, PRKAB1, PTK2B, SPAG9, TAOK1                                                                                                                                            | 2.35        | 0.4940658        |
| <b>Cluster 16</b>                                                  | <b>Enrichment Score: 2.00</b> |          |                                                                                                                                                                                                                                |             |                  |
| <b>Term</b>                                                        | <b>%</b>                      | <b>P</b> |                                                                                                                                                                                                                                | <b>Fold</b> | <b>Benjamini</b> |
| GO:0004714~transmembrane receptor protein tyrosine kinase activity | 1.38                          | 0.005    | CSF1R, ERBB4, FLT3, INSR, MERTK, NTRK3, PDGFRA, ROR1                                                                                                                                                                           | 3.75        | 0.3000027        |
| PIRSF000615:tyrosine-protein kinase, CSF-1/PDGF receptor type      | 0.52                          | 0.008    | CSF1R, FLT3, PDGFRA                                                                                                                                                                                                            | 19.81       | 0.4266923        |
| PIRSF000615:TyrPK_CSF1-R                                           | 0.52                          | 0.008    | CSF1R, FLT3, PDGFRA                                                                                                                                                                                                            | 19.81       | 0.4266923        |
| IPR016243:Tyrosine-protein kinase, CSF-1/PDGF receptor             | 0.52                          | 0.009    | CSF1R, FLT3, PDGFRA                                                                                                                                                                                                            | 19.64       | 0.3582599        |
| IPR001824:Receptor tyrosine kinase, class III, conserved site      | 0.52                          | 0.029    | CSF1R, FLT3, PDGFRA                                                                                                                                                                                                            | 10.91       | 0.636454         |
| <b>Cluster 17</b>                                                  | <b>Enrichment Score: 1.99</b> |          |                                                                                                                                                                                                                                |             |                  |
| <b>Term</b>                                                        | <b>%</b>                      | <b>P</b> |                                                                                                                                                                                                                                | <b>Fold</b> | <b>Benjamini</b> |

|                                                                   |                               |          |                                                                                                                                                                                                                           |             |                  |
|-------------------------------------------------------------------|-------------------------------|----------|---------------------------------------------------------------------------------------------------------------------------------------------------------------------------------------------------------------------------|-------------|------------------|
| GO:0004896~cytokine receptor activity                             | 1.38                          | 0.002    | CSF2RA, EBI3, GFRA1, IL1R1, IL6R, IL6ST, IL7R, LIFR                                                                                                                                                                       | 4.57        | 0.205317         |
| GO:0070120~ciliary neurotrophic factor-mediated signaling pathway | 0.52                          | 0.009    | IL6R, IL6ST, LIFR                                                                                                                                                                                                         | 19.10       | 0.2091599        |
| GO:0019221~cytokine-mediated signaling pathway                    | 1.04                          | 0.068    | IL1R1, IL6R, IL6ST, IRAK3, KLF6, LIFR                                                                                                                                                                                     | 2.73        | 0.5374786        |
| <b>Cluster 18</b>                                                 | <b>Enrichment Score: 1.89</b> |          |                                                                                                                                                                                                                           |             |                  |
| <b>Term</b>                                                       | <b>%</b>                      | <b>P</b> |                                                                                                                                                                                                                           | <b>Fold</b> | <b>Benjamini</b> |
| GO:0007243~protein kinase cascade                                 | 5.01                          | 1.55E-05 | ADRA2C, BLK, CXCR4, DAPK1, ERCC6, F2R, FGD4, GADD45B, GADD45G, IL6ST, INSR, LATS2, MAP3K6, MKNK2, NFKBIA, NRTN, PIAS1, PIK3R1, PRKCA, PTK2B, RPS6KA2, RPS6KA5, SIK1, SPAG9, TGFBR3, TLR2, TXK, WNK1, ZAK                  | 2.49        | 0.0031177        |
| GO:0042325~regulation of phosphorylation                          | 5.35                          | 1.57E-4  | ADRA2C, ATXN7, BMP2, CCND3, CDKN1C, CXCR4, DEPTOR, DGKG, ENPP1, ERCC6, F2R, FGD4, GADD45B, GADD45G, IGF1, IL6R, IL6ST, INHBA, INSR, IRAK3, LATS2, MAP3K6, PFKFB2, PKIB, PPP1CB, PRKCA, PTK2B, RAPGEF3, SPAG9, TSPYL2, ZAK | 2.12        | 0.0121166        |
| GO:0051174~regulation of phosphorus metabolic process             | 5.35                          | 3.06E-4  | ADRA2C, ATXN7, BMP2, CCND3, CDKN1C, CXCR4, DEPTOR, DGKG, ENPP1, ERCC6, F2R, FGD4, GADD45B, GADD45G, IGF1, IL6R, IL6ST, INHBA, INSR, IRAK3, LATS2, MAP3K6, PFKFB2, PKIB, PPP1CB, PRKCA, PTK2B, RAPGEF3, SPAG9, TSPYL2, ZAK | 2.03        | 0.0203186        |
| GO:0019220~regulation of phosphate metabolic process              | 5.35                          | 3.06E-4  | ADRA2C, ATXN7, BMP2, CCND3, CDKN1C, CXCR4, DEPTOR, DGKG, ENPP1, ERCC6, F2R, FGD4, GADD45B, GADD45G, IGF1, IL6R, IL6ST, INHBA, INSR, IRAK3, LATS2, MAP3K6, PFKFB2, PKIB, PPP1CB, PRKCA, PTK2B, RAPGEF3, SPAG9, TSPYL2, ZAK | 2.03        | 0.0203186        |
| GO:0043549~regulation of kinase activity                          | 3.97                          | 0.002    | ADRA2C, CCND3, CDKN1C, CXCR4, DEPTOR, DGKG, ERCC6, F2R, FGD4, GADD45B, GADD45G, INSR, IRAK3, LATS2, MAP3K6, PFKFB2, PKIB, PPP1CB, PRKCA, PTK2B, SPAG9, TSPYL2, ZAK                                                        | 2.05        | 0.091102         |
| GO:0045859~regulation of protein kinase activity                  | 3.80                          | 0.003    | ADRA2C, CCND3, CDKN1C, CXCR4, DEPTOR, DGKG, ERCC6, F2R, FGD4, GADD45B, GADD45G, INSR, IRAK3, LATS2, MAP3K6, PKIB, PPP1CB, PRKCA, PTK2B, SPAG9, TSPYL2, ZAK                                                                | 2.03        | 0.1184377        |
| GO:0051338~regulation of transferase activity                     | 3.97                          | 0.003    | ADRA2C, CCND3, CDKN1C, CXCR4, DEPTOR, DGKG, ERCC6, F2R, FGD4, GADD45B, GADD45G, INSR, IRAK3, LATS2, MAP3K6, PFKFB2, PKIB, PPP1CB, PRKCA, PTK2B, SPAG9, TSPYL2, ZAK                                                        | 1.97        | 0.1243774        |
| GO:0000165~MAPKK cascade                                          | 2.42                          | 0.005    | ADRA2C, CXCR4, ERCC6, F2R, FGD4, GADD45B, GADD45G, INSR, MAP3K6, NRTN, PRKCA, PTK2B, SPAG9, ZAK                                                                                                                           | 2.42        | 0.1614951        |
| GO:0033674~positive regulation of kinase activity                 | 2.76                          | 0.006    | ADRA2C, CCND3, CXCR4, DGKG, ERCC6, F2R, FGD4, GADD45B, GADD45G, INSR, MAP3K6, PFKFB2, PPP1CB, PTK2B, SPAG9, ZAK                                                                                                           | 2.20        | 0.1755893        |
| GO:0000186~activation of MAPKK activity                           | 0.86                          | 0.007    | ERCC6, F2R, GADD45B, GADD45G, ZAK                                                                                                                                                                                         | 6.37        | 0.1878801        |
| GO:0051347~positive regulation of transferase activity            | 2.76                          | 0.009    | ADRA2C, CCND3, CXCR4, DGKG, ERCC6, F2R, FGD4, GADD45B, GADD45G, INSR, MAP3K6, PFKFB2, PPP1CB, PTK2B, SPAG9, ZAK                                                                                                           | 2.12        | 0.2080321        |
| GO:0045860~positive regulation of protein kinase activity         | 2.59                          | 0.011    | ADRA2C, CCND3, CXCR4, DGKG, ERCC6, F2R, FGD4, GADD45B, GADD45G, INSR, MAP3K6, PPP1CB, PTK2B, SPAG9, ZAK                                                                                                                   | 2.14        | 0.2233342        |
| GO:0043405~regulation of MAP kinase activity                      | 1.90                          | 0.013    | ADRA2C, CXCR4, ERCC6, FGD4, INSR, IRAK3, MAP3K6, PRKCA, PTK2B, SPAG9, ZAK                                                                                                                                                 | 2.48        | 0.2524778        |
| GO:0000187~activation of MAPK activity                            | 1.38                          | 0.014    | ADRA2C, CXCR4, ERCC6, FGD4, INSR, MAP3K6, SPAG9, ZAK                                                                                                                                                                      | 3.11        | 0.2606802        |
| GO:0043406~positive regulation of MAP kinase activity             | 1.55                          | 0.015    | ADRA2C, CXCR4, ERCC6, FGD4, INSR, MAP3K6, PTK2B, SPAG9, ZAK                                                                                                                                                               | 2.81        | 0.2635496        |
| GO:0043507~positive regulation of JUN kinase activity             | 0.86                          | 0.017    | ERCC6, FGD4, MAP3K6, PTK2B, ZAK                                                                                                                                                                                           | 4.97        | 0.2848393        |
| GO:0043408~regulation of MAPKKK cascade                           | 1.55                          | 0.021    | ERCC6, F2R, FGD4, HIPK2, IL6R, INSR, MAP3K6, PTK2B, ZAK                                                                                                                                                                   | 2.63        | 0.3216015        |
| GO:0043506~regulation of JUN kinase activity                      | 0.86                          | 0.029    | ERCC6, FGD4, MAP3K6, PTK2B, ZAK                                                                                                                                                                                           | 4.30        | 0.370244         |
| GO:0007257~activation of JUN kinase activity                      | 0.69                          | 0.047    | ERCC6, FGD4, MAP3K6, ZAK                                                                                                                                                                                                  | 4.90        | 0.4596867        |
| GO:0044093~positive regulation of molecular function              | 4.66                          | 0.048    | ADCYAP1R1, ADORA3, ADRA2C, ARHGAP6, CALD1, CCND3, COL4A3, CXCR4, DGKG, ERCC6, F2R, F3, FGD4, GADD45B, GADD45G, HIPK2, INSR, IRAK3, MAP3K6, NMUR2, PFKFB2, PPP1CB, PTK2B, SPAG9, TGFBR3, TLR2, ZAK                         | 1.47        | 0.4656015        |

|                                                                            |                               |          |                                                                                                                                                                |             |                  |
|----------------------------------------------------------------------------|-------------------------------|----------|----------------------------------------------------------------------------------------------------------------------------------------------------------------|-------------|------------------|
| GO:0046328~regulation of JNK cascade                                       | 1.04                          | 0.053    | ERCC6, FGD4, HIPK2, MAP3K6, PTK2B, ZAK                                                                                                                         | 2.94        | 0.4811419        |
| GO:0070302~regulation of stress-activated protein kinase signaling pathway | 1.04                          | 0.065    | ERCC6, FGD4, HIPK2, MAP3K6, PTK2B, ZAK                                                                                                                         | 2.77        | 0.5258098        |
| GO:0032147~activation of protein kinase activity                           | 1.38                          | 0.067    | DGKG, ERCC6, F2R, GADD45B, GADD45G, INSR, PTK2B, ZAK                                                                                                           | 2.23        | 0.5345401        |
| GO:0080135~regulation of cellular response to stress                       | 1.21                          | 0.105    | ERCC6, FGD4, HIPK2, MAP3K6, NTRK3, PTK2B, ZAK                                                                                                                  | 2.16        | 0.6298038        |
| GO:0043085~positive regulation of catalytic activity                       | 3.80                          | 0.143    | ADCYAP1R1, ADORA3, ADRA2C, ARHGAP6, CCND3, COL4A3, CXCR4, DGKG, ERCC6, F2R, F3, FGD4, GADD45B, GADD45G, INSR, MAP3K6, NMUR2, PFKFB2, PPP1CB, PTK2B, SPAG9, ZAK | 1.35        | 0.7112606        |
| GO:0010627~regulation of protein kinase cascade                            | 2.07                          | 0.160    | ERCC6, F2R, F3, FGD4, HIPK2, IGF1, IL6R, IL6ST, INSR, MAP3K6, PTK2B, ZAK                                                                                       | 1.53        | 0.7330273        |
| GO:0007254~JNK cascade                                                     | 0.69                          | 0.282    | ERCC6, FGD4, MAP3K6, ZAK                                                                                                                                       | 2.16        | 0.8660435        |
| GO:0031098~stress-activated protein kinase signaling pathway               | 0.69                          | 0.316    | ERCC6, FGD4, MAP3K6, ZAK                                                                                                                                       | 2.02        | 0.8942503        |
| GO:0042770~DNA damage response, signal transduction                        | 0.69                          | 0.461    | ERCC6, FBXO31, HIPK2, ZAK                                                                                                                                      | 1.59        | 0.9592314        |
| <b>Cluster 19</b>                                                          | <b>Enrichment Score: 1.86</b> |          |                                                                                                                                                                |             |                  |
| <b>Term</b>                                                                | <b>%</b>                      | <b>P</b> |                                                                                                                                                                | <b>Fold</b> | <b>Benjamini</b> |
| GO:0004896~cytokine receptor activity                                      | 1.38                          | 0.002    | CSF2RA, EBI3, GFRA1, IL1R1, IL6R, IL6ST, IL7R, LIFR                                                                                                            | 4.57        | 0.205317         |
| IPR008957:Fibronectin, type III-like fold                                  | 2.25                          | 0.011    | CSF2RA, EBI3, F3, FNDC3B, IL6R, IL6ST, IL7R, INSR, LIFR, MERTK, MYBPC1, PTPRG, PTPRM                                                                           | 2.31        | 0.3920326        |
| IPR003961:Fibronectin, type III                                            | 2.07                          | 0.032    | CSF2RA, EBI3, FNDC3B, IL6R, IL6ST, IL7R, INSR, LIFR, MERTK, MYBPC1, PTPRG, PTPRM                                                                               | 2.07        | 0.6537001        |
| SM00060:FN3                                                                | 2.07                          | 0.064    | CSF2RA, EBI3, FNDC3B, IL6R, IL6ST, IL7R, INSR, LIFR, MERTK, MYBPC1, PTPRG, PTPRM                                                                               | 1.83        | 0.6857741        |
| <b>Cluster 20</b>                                                          | <b>Enrichment Score: 1.79</b> |          |                                                                                                                                                                |             |                  |
| <b>Term</b>                                                                | <b>%</b>                      | <b>P</b> |                                                                                                                                                                | <b>Fold</b> | <b>Benjamini</b> |
| GO:0030036~actin cytoskeleton organization                                 | 2.76                          | 0.005    | ARHGAP26, ARHGAP6, BCL6, CALD1, ELMO1, ELN, FERMT2, FGD4, ITGB1, LPIN1, MTSS1, PTK2B, RHOU, SHROOM3, WASF2, WASF3                                              | 2.25        | 0.1579872        |
| GO:0030029~actin filament-based process                                    | 2.76                          | 0.009    | ARHGAP26, ARHGAP6, BCL6, CALD1, ELMO1, ELN, FERMT2, FGD4, ITGB1, LPIN1, MTSS1, PTK2B, RHOU, SHROOM3, WASF2, WASF3                                              | 2.11        | 0.2106697        |
| GO:0007010~cytoskeleton organization                                       | 3.45                          | 0.094    | ARHGAP10, ARHGAP26, ARHGAP6, BCL6, CALD1, ELMO1, ELN, FERMT2, FGD4, HOOK1, ITGB1, LPIN1, MAP1B, MICAL1, MTSS1, PTK2B, RHOU, SHROOM3, WASF2, WASF3              | 1.46        | 0.6046078        |

The 889 probe sets showing  $\geq 1.25$  fold ( $P \leq 0.05$ ) induction by budesonide in the biopsy microarray analysis were analyzed using the DAVID gene ID conversion tool to produce 588 separate identities that were used for functional annotation clustering in DAVID (default settings, medium stringency). This returned 183 clusters of which those with the highest 20 enrichment scores are shown. % = percentage of the gene list with associated probability ( $P$ ). Fold = fold enrichment with the associated Benjamini score.



SUPPLEMENTAL TABLE 9

Primary human bronchial epithelial cell microarray data: Probes sets showing  $\geq 2$  fold, or  $\leq 0.5$  fold change ( $P \leq 0.05$ ) following 6 h of *in vitro* budesonide treatment

| Probe set ID  | Entrez Gene | Gene Symbol | Gene Title                                                                     | P-value (Bud/Plac) | Fold (Bud/Plac) |
|---------------|-------------|-------------|--------------------------------------------------------------------------------|--------------------|-----------------|
| 11751415_a_at | 1831        | TSC22D3     | TSC22 domain family, member 3                                                  | 2.9E-11            | 14.88           |
| 11743917_a_at | 2289        | FKBP5       | FK506 binding protein 5                                                        | 1.2E-12            | 13.43           |
| 11717829_s_at | 1831        | TSC22D3     | TSC22 domain family, member 3                                                  | 1.2E-11            | 12.51           |
| 11739567_s_at | 2289        | FKBP5       | FK506 binding protein 5                                                        | 1.1E-11            | 12.44           |
| 11739565_a_at | 2289        | FKBP5       | FK506 binding protein 5                                                        | 1.8E-11            | 10.12           |
| 11748099_a_at | 116154      | PHACTR3     | phosphatase and actin regulator 3                                              | 9.7E-09            | 9.70            |
| 11726088_s_at | 116154      | PHACTR3     | phosphatase and actin regulator 3                                              | 7.3E-09            | 9.33            |
| 11729371_a_at | 7704        | ZBTB16      | zinc finger and BTB domain containing 16                                       | 1.6E-07            | 8.44            |
| 11736273_a_at | 7097        | TLR2        | toll-like receptor 2                                                           | 1.0E-07            | 8.07            |
| 11754833_a_at | 7097        | TLR2        | toll-like receptor 2                                                           | 2.0E-07            | 7.86            |
| 11746275_a_at | 2289        | FKBP5       | FK506 binding protein 5                                                        | 4.0E-10            | 7.07            |
| 11716974_a_at | 5166        | PDK4        | pyruvate dehydrogenase kinase, isozyme 4                                       | 2.2E-02            | 6.34            |
| 11728201_at   | 4015        | LOX         | lysyl oxidase                                                                  | 1.1E-03            | 5.78            |
| 11717830_a_at | 1831        | TSC22D3     | TSC22 domain family, member 3                                                  | 4.0E-08            | 5.76            |
| 11723222_s_at | 9499        | MYOT        | myotilin                                                                       | 4.6E-07            | 5.76            |
| 11740995_x_at | 2752        | GLUL        | glutamate-ammonia ligase                                                       | 5.5E-08            | 5.57            |
| 11742816_a_at | 10144       | FAM13A      | family with sequence similarity 13, member A                                   | 3.3E-05            | 5.41            |
| 11744337_a_at | 2752        | GLUL        | glutamate-ammonia ligase                                                       | 3.1E-07            | 5.31            |
| 11717168_a_at | 5187        | PER1        | period circadian clock 1                                                       | 9.6E-09            | 5.21            |
| 11728055_at   | 2690        | GHR         | growth hormone receptor                                                        | 5.1E-07            | 4.92            |
| 11718876_at   | 92737       | DNER        | delta/notch-like EGF repeat containing                                         | 3.2E-04            | 4.89            |
| 11717326_at   | 687         | KLF9        | Kruppel-like factor 9                                                          | 7.0E-10            | 4.78            |
| 11730310_at   | 29842       | TFCP2L1     | transcription factor CP2-like 1                                                | 2.7E-05            | 4.53            |
| 11728200_a_at | 4015        | LOX         | lysyl oxidase                                                                  | 2.2E-03            | 4.25            |
| 11744779_a_at | 10144       | FAM13A      | family with sequence similarity 13, member A                                   | 1.6E-04            | 4.18            |
| 11758995_at   | 4015        | LOX         | lysyl oxidase                                                                  | 5.1E-03            | 4.16            |
| 11755138_s_at | 158586      | ZXDB        | zinc finger, X-linked, duplicated B                                            | 6.3E-09            | 4.10            |
| 11733044_at   | 6542        | SLC7A2      | solute carrier family 7 (cationic amino acid transporter, y+ system), member 2 | 1.8E-06            | 4.06            |
| 11724157_x_at | 6783        | SULT1E1     | sulfotransferase family 1E, estrogen-preferring, member 1                      | 5.4E-03            | 3.99            |
| 11737088_at   | 7092        | TLL1        | tolloid-like 1                                                                 | 9.5E-03            | 3.92            |
| 11725521_x_at | 2752        | GLUL        | glutamate-ammonia ligase                                                       | 4.6E-07            | 3.84            |
| 11720139_a_at | 128434      | VSTM2L      | V-set and transmembrane domain containing 2 like                               | 6.7E-07            | 3.78            |
| 11717327_at   | 687         | KLF9        | Kruppel-like factor 9                                                          | 6.3E-05            | 3.77            |
| 11724156_at   | 6783        | SULT1E1     | sulfotransferase family 1E, estrogen-preferring, member 1                      | 7.1E-03            | 3.74            |
| 11723803_a_at | 54209       | TREM2       | triggering receptor expressed on myeloid cells 2                               | 4.6E-04            | 3.72            |
| 11739566_a_at | 2289        | FKBP5       | FK506 binding protein 5                                                        | 1.9E-08            | 3.70            |
| 11715757_a_at | 5997        | RGS2        | regulator of G-protein signaling 2, 24kDa                                      | 1.4E-03            | 3.69            |
| 11721625_s_at | 2752        | GLUL        | glutamate-ammonia ligase                                                       | 6.9E-06            | 3.60            |
| 11745612_a_at | 54209       | TREM2       | triggering receptor expressed on myeloid cells 2                               | 3.0E-04            | 3.57            |
| 11731973_at   | 6340        | SCNN1G      | sodium channel, non-voltage-gated 1, gamma subunit                             | 2.6E-05            | 3.35            |
| 11739539_a_at | 5295        | PIK3R1      | phosphoinositide-3-kinase, regulatory subunit 1 (alpha)                        | 1.7E-07            | 3.35            |
| 11750970_a_at | 4015        | LOX         | lysyl oxidase                                                                  | 3.8E-03            | 3.31            |
| 11755020_a_at | 283537      | SLC46A3     | solute carrier family 46, member 3                                             | 1.8E-02            | 3.29            |
| 11724155_at   | 6783        | SULT1E1     | sulfotransferase family 1E, estrogen-preferring, member 1                      | 5.4E-03            | 3.26            |
| 11721895_x_at | 2619        | GAS1        | growth arrest-specific 1                                                       | 7.9E-03            | 3.16            |
| 11756888_a_at | 29842       | TFCP2L1     | transcription factor CP2-like 1                                                | 1.5E-04            | 3.13            |
| 11754595_s_at | 1836        | SLC26A2     | solute carrier family 26 (sulfate transporter), member 2                       | 2.5E-04            | 2.97            |
| 11733019_a_at | 5295        | PIK3R1      | phosphoinositide-3-kinase, regulatory subunit 1 (alpha)                        | 8.7E-05            | 2.95            |

|               |        |           |                                                                                         |         |      |
|---------------|--------|-----------|-----------------------------------------------------------------------------------------|---------|------|
| 11717912_s_at | 9547   | CXCL14    | chemokine (C-X-C motif) ligand 14                                                       | 3.7E-03 | 2.93 |
| 11755450_a_at | 57507  | ZNF608    | zinc finger protein 608                                                                 | 3.6E-04 | 2.93 |
| 11727284_at   | 23316  | CUX2      | cut-like homeobox 2                                                                     | 1.8E-04 | 2.91 |
| 11720746_s_at | 604    | BCL6      | B-cell CLL/lymphoma 6                                                                   | 2.1E-04 | 2.91 |
| 11749685_a_at | 10144  | FAM13A    | family with sequence similarity 13, member A                                            | 1.6E-03 | 2.87 |
| 11726113_a_at | 115572 | FAM46B    | family with sequence similarity 46, member B                                            | 4.6E-05 | 2.86 |
| 11756059_a_at | 9547   | CXCL14    | chemokine (C-X-C motif) ligand 14                                                       | 4.5E-03 | 2.83 |
| 11736001_s_at | 1634   | DCN       | decorin                                                                                 | 2.0E-02 | 2.83 |
| 11718651_at   | 83857  | TMTC1     | transmembrane and tetratricopeptide repeat containing 1                                 | 3.9E-02 | 2.79 |
| 11726894_a_at | 11213  | IRAK3     | interleukin-1 receptor-associated kinase 3                                              | 7.3E-04 | 2.76 |
| 11733042_at   | 6542   | SLC7A2    | solute carrier family 7 (cationic amino acid transporter, y+ system), member 2          | 7.6E-03 | 2.74 |
| 11726114_at   | 115572 | FAM46B    | family with sequence similarity 46, member B                                            | 9.1E-06 | 2.73 |
| 11735271_a_at | 2650   | GCNT1     | glucosaminyl (N-acetyl) transferase 1, core 2                                           | 9.0E-03 | 2.73 |
| 11730195_at   | 23541  | SEC14L2   | SEC14-like 2 (S. cerevisiae)                                                            | 1.4E-04 | 2.73 |
| 11720106_a_at | 1836   | SLC26A2   | solute carrier family 26 (sulfate transporter), member 2                                | 1.5E-02 | 2.71 |
| 11752184_a_at | 57507  | ZNF608    | zinc finger protein 608                                                                 | 1.7E-04 | 2.70 |
| 11721572_at   | 387695 | C10orf99  | chromosome 10 open reading frame 99                                                     | 9.8E-03 | 2.69 |
| 11739315_at   | 3791   | KDR       | kinase insert domain receptor (a type III receptor tyrosine kinase)                     | 5.9E-03 | 2.69 |
| 11728825_at   | 388610 | TRNP1     | TMF1-regulated nuclear protein 1                                                        | 5.3E-06 | 2.68 |
| 11730593_at   | 387700 | SLC16A12  | solute carrier family 16, member 12 (monocarboxylic acid transporter 12)                | 2.5E-02 | 2.68 |
| 11720745_a_at | 604    | BCL6      | B-cell CLL/lymphoma 6                                                                   | 1.7E-04 | 2.66 |
| 11717440_a_at | 2059   | EPS8      | epidermal growth factor receptor pathway substrate 8                                    | 1.2E-04 | 2.62 |
| 11724997_a_at | 942    | CD86      | CD86 molecule                                                                           | 1.5E-02 | 2.58 |
| 11759525_at   | 4616   | GADD45B   | growth arrest and DNA-damage-inducible, beta                                            | 5.6E-05 | 2.57 |
| 11715766_a_at | 1843   | DUSP1     | dual specificity phosphatase 1                                                          | 5.1E-03 | 2.57 |
| 11719899_at   | 387763 | C11orf96  | chromosome 11 open reading frame 96                                                     | 1.3E-02 | 2.56 |
| 11736375_a_at | 942    | CD86      | CD86 molecule                                                                           | 2.3E-02 | 2.54 |
| 11763337_a_at | 26468  | LHX6      | LIM homeobox 6                                                                          | 1.7E-03 | 2.52 |
| 11752993_a_at | 1843   | DUSP1     | dual specificity phosphatase 1                                                          | 7.6E-03 | 2.48 |
| 11718012_at   | 8660   | IRS2      | insulin receptor substrate 2                                                            | 5.7E-05 | 2.47 |
| 11725512_a_at | 55089  | SLC38A4   | solute carrier family 38, member 4                                                      | 1.9E-05 | 2.45 |
| 11750749_a_at | 604    | BCL6      | B-cell CLL/lymphoma 6                                                                   | 9.0E-04 | 2.43 |
| 11737087_at   | 7092   | TLL1      | tolloid-like 1                                                                          | 9.9E-03 | 2.40 |
| 11728523_a_at | 4610   | MYCL1     | v-myc myelocytomatosis viral oncogene homolog 1, lung carcinoma derived (avian)         | 1.5E-03 | 2.39 |
| 11757865_a_at | 4616   | GADD45B   | growth arrest and DNA-damage-inducible, beta                                            | 9.5E-05 | 2.39 |
| 11755403_a_at | 83539  | CHST9     | carbohydrate (N-acetylgalactosamine 4-O) sulfotransferase 9                             | 1.3E-03 | 2.38 |
| 11718780_a_at | 23635  | SSBP2     | single-stranded DNA binding protein 2                                                   | 3.0E-06 | 2.38 |
| 11719408_a_at | 28996  | HIPK2     | homeodomain interacting protein kinase 2                                                | 1.4E-04 | 2.38 |
| 11736581_a_at | 2650   | GCNT1     | glucosaminyl (N-acetyl) transferase 1, core 2                                           | 9.0E-03 | 2.38 |
| 11754631_x_at | 5295   | PIK3R1    | phosphoinositide-3-kinase, regulatory subunit 1 (alpha)                                 | 1.2E-02 | 2.37 |
| 11720967_a_at | 29899  | GPSM2     | G-protein signaling modulator 2                                                         | 9.5E-06 | 2.37 |
| 11733139_a_at | 10124  | ARL4A     | ADP-ribosylation factor-like 4A                                                         | 5.3E-04 | 2.35 |
| 11732521_a_at | 83539  | CHST9     | carbohydrate (N-acetylgalactosamine 4-O) sulfotransferase 9                             | 2.1E-03 | 2.33 |
| 11739230_a_at | 10124  | ARL4A     | ADP-ribosylation factor-like 4A                                                         | 1.6E-03 | 2.33 |
| 11740994_a_at | 2752   | GLUL      | glutamate-ammonia ligase                                                                | 5.6E-05 | 2.32 |
| 11746856_a_at | 5054   | SERPINE1  | serpin peptidase inhibitor, clade E (nexin, plasminogen activator inhibitor type 1), me | 3.8E-02 | 2.31 |
| 11724394_at   | 343990 | KIAA1211L | KIAA1211-like                                                                           | 4.0E-03 | 2.30 |
| 11754183_s_at | 3149   | HMGB3     | high mobility group box 3                                                               | 4.6E-04 | 2.29 |
| 11753047_a_at | 441024 | MTHFD2L   | methylenetetrahydrofolate dehydrogenase (NADP+ dependent) 2-like                        | 5.2E-03 | 2.29 |
| 11715659_s_at | 54206  | ERRF1     | ERBB receptor feedback inhibitor 1                                                      | 4.4E-05 | 2.28 |
| 11722783_at   | 94234  | FOXQ1     | forkhead box Q1                                                                         | 4.5E-03 | 2.28 |
| 11756387_x_at | 10124  | ARL4A     | ADP-ribosylation factor-like 4A                                                         | 9.6E-04 | 2.28 |

|               |                                                                                                                                  |                                                                                                                                                                                                     |                                                                                            |         |      |
|---------------|----------------------------------------------------------------------------------------------------------------------------------|-----------------------------------------------------------------------------------------------------------------------------------------------------------------------------------------------------|--------------------------------------------------------------------------------------------|---------|------|
| 11759322_at   | 604                                                                                                                              | BCL6                                                                                                                                                                                                | B-cell CLL/lymphoma 6                                                                      | 1.9E-04 | 2.27 |
| 11741001_s_at | 10144                                                                                                                            | FAM13A                                                                                                                                                                                              | family with sequence similarity 13, member A                                               | 1.8E-03 | 2.27 |
| 11722852_s_at | 330                                                                                                                              | BIRC3                                                                                                                                                                                               | baculoviral IAP repeat containing 3                                                        | 2.6E-03 | 2.26 |
| 11720520_s_at | 9659 ///<br>728802<br>///<br>1009967<br>24 ///<br>1009967<br>61 ///<br>1010602<br>91 ///<br>1010603<br>44 ///<br>1010603<br>53 / | LOC100996<br>724 ///<br>LOC100996<br>761 ///<br>LOC101060<br>291 ///<br>LOC101060<br>344 ///<br>LOC101060<br>353 ///<br>LOC101060<br>463 ///<br>LOC101060<br>582 ///<br>LOC728802<br>///<br>PDE4DIP | myomegalin-like /// myomegalin-like /// myomegalin-like ///<br>uncharacterized LOC10106034 | 1.6E-04 | 2.25 |
| 11730194_a_at | 23541                                                                                                                            | SEC14L2                                                                                                                                                                                             | SEC14-like 2 (S. cerevisiae)                                                               | 4.7E-05 | 2.23 |
| 11728826_s_at | 388610                                                                                                                           | TRNP1                                                                                                                                                                                               | TMF1-regulated nuclear protein 1                                                           | 1.2E-05 | 2.23 |
| 11719527_a_at | 146330                                                                                                                           | FBXL16                                                                                                                                                                                              | F-box and leucine-rich repeat protein 16                                                   | 2.1E-02 | 2.23 |
| 11749481_a_at | 23087                                                                                                                            | TRIM35                                                                                                                                                                                              | tripartite motif containing 35                                                             | 5.6E-05 | 2.22 |
| 11733017_a_at | 5295                                                                                                                             | PIK3R1                                                                                                                                                                                              | phosphoinositide-3-kinase, regulatory subunit 1 (alpha)                                    | 2.4E-02 | 2.22 |
| 11715636_a_at | 5054                                                                                                                             | SERPINE1                                                                                                                                                                                            | serpin peptidase inhibitor, clade E (nexin, plasminogen activator inhibitor type 1), me    | 3.7E-02 | 2.21 |
| 11718013_at   | 8660                                                                                                                             | IRS2                                                                                                                                                                                                | insulin receptor substrate 2                                                               | 6.3E-03 | 2.21 |
| 11742813_at   | 57556                                                                                                                            | SEMA6A                                                                                                                                                                                              | sema domain, transmembrane domain (TM), and cytoplasmic domain, (semaphorin) 6A            | 4.1E-03 | 2.20 |
| 11724998_a_at | 942                                                                                                                              | CD86                                                                                                                                                                                                | CD86 molecule                                                                              | 1.9E-03 | 2.20 |
| 11744229_a_at | 65997                                                                                                                            | RASL11B                                                                                                                                                                                             | RAS-like, family 11, member B                                                              | 1.4E-02 | 2.20 |
| 11743136_x_at | 1052                                                                                                                             | CEBPD                                                                                                                                                                                               | CCAAT/enhancer binding protein (C/EBP), delta                                              | 2.4E-07 | 2.19 |
| 11725268_s_at | 79633                                                                                                                            | FAT4                                                                                                                                                                                                | FAT atypical cadherin 4                                                                    | 9.5E-04 | 2.19 |
| 11733140_s_at | 10124                                                                                                                            | ARL4A                                                                                                                                                                                               | ADP-ribosylation factor-like 4A                                                            | 1.2E-03 | 2.19 |
| 11728829_at   | 3625                                                                                                                             | INHBB                                                                                                                                                                                               | inhibin, beta B                                                                            | 8.4E-03 | 2.18 |
| 11734164_a_at | 26084                                                                                                                            | ARHGEF26                                                                                                                                                                                            | Rho guanine nucleotide exchange factor (GEF) 26                                            | 2.7E-03 | 2.18 |
| 11746140_a_at | 26084                                                                                                                            | ARHGEF26                                                                                                                                                                                            | Rho guanine nucleotide exchange factor (GEF) 26                                            | 2.7E-03 | 2.18 |
| 11724961_a_at | 9901                                                                                                                             | SRGAP3                                                                                                                                                                                              | SLIT-ROBO Rho GTPase activating protein 3                                                  | 3.9E-07 | 2.17 |
| 11740964_a_at | 441024                                                                                                                           | MTHFD2L                                                                                                                                                                                             | methylenetetrahydrofolate dehydrogenase (NADP+ dependent) 2-like                           | 1.3E-03 | 2.17 |
| 11750770_a_at | 2729                                                                                                                             | GCLC                                                                                                                                                                                                | glutamate-cysteine ligase, catalytic subunit                                               | 2.2E-04 | 2.17 |
| 11719409_a_at | 28996                                                                                                                            | HIPK2                                                                                                                                                                                               | homeodomain interacting protein kinase 2                                                   | 1.9E-07 | 2.16 |
| 11718781_s_at | 23635                                                                                                                            | SSBP2                                                                                                                                                                                               | single-stranded DNA binding protein 2                                                      | 1.1E-04 | 2.14 |
| 11735309_a_at | 4610                                                                                                                             | MYCL1                                                                                                                                                                                               | v-myc myelocytomatosis viral oncogene homolog 1, lung carcinoma derived (avian)            | 2.0E-03 | 2.14 |
| 11719676_s_at | 4128                                                                                                                             | MAOA                                                                                                                                                                                                | monoamine oxidase A                                                                        | 3.4E-06 | 2.14 |
| 11726896_a_at | 11213                                                                                                                            | IRAK3                                                                                                                                                                                               | interleukin-1 receptor-associated kinase 3                                                 | 1.7E-02 | 2.13 |
| 11719410_s_at | 28996                                                                                                                            | HIPK2                                                                                                                                                                                               | homeodomain interacting protein kinase 2                                                   | 2.8E-08 | 2.12 |
| 11729218_a_at | 2729                                                                                                                             | GCLC                                                                                                                                                                                                | glutamate-cysteine ligase, catalytic subunit                                               | 4.7E-04 | 2.11 |
| 11723343_at   | 23087                                                                                                                            | TRIM35                                                                                                                                                                                              | tripartite motif containing 35                                                             | 8.7E-08 | 2.11 |
| 11720565_a_at | 89797                                                                                                                            | NAV2                                                                                                                                                                                                | neuron navigator 2                                                                         | 3.0E-04 | 2.11 |
| 11758028_s_at | 94234                                                                                                                            | FOXQ1                                                                                                                                                                                               | forkhead box Q1                                                                            | 1.9E-03 | 2.10 |
| 11724931_a_at | 10461                                                                                                                            | MERTK                                                                                                                                                                                               | c-mer proto-oncogene tyrosine kinase                                                       | 4.9E-02 | 2.10 |
| 11757312_x_at | 5054                                                                                                                             | SERPINE1                                                                                                                                                                                            | serpin peptidase inhibitor, clade E (nexin, plasminogen activator inhibitor type 1), me    | 3.8E-02 | 2.09 |
| 11763714_a_at | 23635                                                                                                                            | SSBP2                                                                                                                                                                                               | single-stranded DNA binding protein 2                                                      | 2.9E-05 | 2.09 |
| 11728921_at   | 83992                                                                                                                            | CTTNBP2                                                                                                                                                                                             | cortactin binding protein 2                                                                | 4.7E-02 | 2.07 |
| 11719736_s_at | 54463                                                                                                                            | FAM134B                                                                                                                                                                                             | family with sequence similarity 134, member B                                              | 1.6E-02 | 2.07 |
| 11742768_a_at | 23767                                                                                                                            | FLRT3                                                                                                                                                                                               | fibronectin leucine rich transmembrane protein 3                                           | 8.0E-05 | 2.06 |

|               |                   |                   |                                                                                        |         |      |
|---------------|-------------------|-------------------|----------------------------------------------------------------------------------------|---------|------|
| 11734619_x_at | 247               | ALOX15B           | arachidonate 15-lipoxygenase, type B                                                   | 1.3E-02 | 2.06 |
| 11722850_a_at | 330               | BIRC3             | baculoviral IAP repeat containing 3                                                    | 9.0E-03 | 2.05 |
| 11723344_at   | 23087             | TRIM35            | tripartite motif containing 35                                                         | 1.2E-07 | 2.05 |
| 11735270_a_at | 2650              | GCNT1             | glucosaminyl (N-acetyl) transferase 1, core 2                                          | 3.1E-02 | 2.03 |
| 11731465_a_at | 1075              | CTSC              | cathepsin C                                                                            | 1.0E-03 | 2.03 |
| 11743626_s_at | 55366             | LGR4              | leucine-rich repeat containing G protein-coupled receptor 4                            | 3.5E-06 | 2.03 |
| 11721983_a_at | 55022             | PID1              | phosphotyrosine interaction domain containing 1                                        | 1.6E-02 | 2.02 |
| 11746658_a_at | 942               | CD86              | CD86 molecule                                                                          | 1.6E-02 | 2.02 |
| 11727552_at   | 2535              | FZD2              | frizzled family receptor 2                                                             | 2.6E-03 | 2.01 |
| 11754931_a_at | 2729              | GCLC              | glutamate-cysteine ligase, catalytic subunit                                           | 2.3E-04 | 2.01 |
| 11739518_a_at | 23767             | FLRT3             | fibronectin leucine rich transmembrane protein 3                                       | 1.0E-04 | 2.00 |
| 11736382_at   | 90874             | ZNF697            | zinc finger protein 697                                                                | 1.5E-03 | 0.50 |
| 11734339_at   | 5453              | POU3F1            | POU class 3 homeobox 1                                                                 | 1.5E-04 | 0.50 |
| 11718577_s_at | 10276             | NET1              | neuroepithelial cell transforming 1                                                    | 2.6E-04 | 0.50 |
| 11720760_x_at | 10625             | IVNS1ABP          | influenza virus NS1A binding protein                                                   | 4.9E-02 | 0.50 |
| 11739768_a_at | 5791              | PTPRE             | protein tyrosine phosphatase, receptor type, E                                         | 8.9E-03 | 0.50 |
| 11755562_a_at | 2863              | GPR39             | G protein-coupled receptor 39                                                          | 1.3E-04 | 0.50 |
| 11749997_x_at | 7447              | VSNL1             | visinin-like 1                                                                         | 5.2E-03 | 0.50 |
| 11743434_a_at | 50515             | CHST11            | carbohydrate (chondroitin 4) sulfotransferase 11                                       | 1.1E-04 | 0.49 |
| 11723418_a_at | 7447              | VSNL1             | visinin-like 1                                                                         | 8.7E-03 | 0.49 |
| 11722547_a_at | 3096              | HIVEP1            | human immunodeficiency virus type I enhancer binding protein 1                         | 7.4E-03 | 0.49 |
| 11754114_a_at | 2919              | CXCL1             | chemokine (C-X-C motif) ligand 1 (melanoma growth stimulating activity, alpha)         | 4.3E-02 | 0.49 |
| 11726703_a_at | 8915              | BCL10             | B-cell CLL/lymphoma 10                                                                 | 1.5E-04 | 0.49 |
| 11754344_s_at | 81848             | SPRY4             | sprouty homolog 4 (Drosophila)                                                         | 2.7E-02 | 0.49 |
| 11716151_a_at | 56937             | PMEP1             | prostate transmembrane protein, androgen induced 1                                     | 1.1E-02 | 0.49 |
| 11729574_at   | 8507              | ENC1              | ectodermal-neural cortex 1 (with BTB domain)                                           | 6.2E-03 | 0.49 |
| 11730390_at   | 10371             | SEMA3A            | sema domain, immunoglobulin domain (Ig), short basic domain, secreted, (semaphorin) 3A | 7.7E-04 | 0.49 |
| 11732454_at   | 3772              | KCNJ15            | potassium inwardly-rectifying channel, subfamily J, member 15                          | 8.4E-03 | 0.48 |
| 11743596_a_at | 5791              | PTPRE             | protein tyrosine phosphatase, receptor type, E                                         | 5.0E-03 | 0.48 |
| 11728161_at   | 7476              | WNT7A             | wingless-type MMTV integration site family, member 7A                                  | 4.1E-06 | 0.48 |
| 11718940_a_at | 7128              | TNFAIP3           | tumor necrosis factor, alpha-induced protein 3                                         | 3.9E-03 | 0.48 |
| 11732180_a_at | 5724              | PTAFR             | platelet-activating factor receptor                                                    | 9.6E-05 | 0.48 |
| 11723820_a_at | 64750             | SMURF2            | SMAD specific E3 ubiquitin protein ligase 2                                            | 1.0E-05 | 0.48 |
| 11758583_s_at | 201799            | TMEM154           | transmembrane protein 154                                                              | 5.4E-04 | 0.48 |
| 11743063_x_at | 5329              | PLAUR             | plasminogen activator, urokinase receptor                                              | 1.2E-03 | 0.48 |
| 11753988_a_at | 10253             | SPRY2             | sprouty homolog 2 (Drosophila)                                                         | 2.2E-02 | 0.48 |
| 11758050_s_at | 5998              | RGS3              | regulator of G-protein signaling 3                                                     | 2.8E-03 | 0.48 |
| 11718201_at   | 23462             | HEY1              | hairy/enhancer-of-split related with YRPW motif 1                                      | 1.5E-03 | 0.48 |
| 11715306_s_at | 374 ///<br>727738 | AREG ///<br>AREGB | amphiregulin /// amphiregulin B                                                        | 2.5E-03 | 0.48 |
| 11733214_a_at | 162394            | SLFN5             | schlafen family member 5                                                               | 5.4E-05 | 0.48 |
| 11749996_a_at | 7447              | VSNL1             | visinin-like 1                                                                         | 7.5E-03 | 0.48 |
| 11751656_a_at | 201799            | TMEM154           | transmembrane protein 154                                                              | 3.9E-04 | 0.48 |
| 11746862_x_at | 79642             | ARSJ              | arylsulfatase family, member J                                                         | 8.6E-06 | 0.47 |
| 11723592_at   | 84230             | LRRC8C            | leucine rich repeat containing 8 family, member C                                      | 9.3E-03 | 0.47 |
| 11730363_a_at | 3269              | HRH1              | histamine receptor H1                                                                  | 3.5E-02 | 0.47 |
| 11738219_s_at | 127534            | GJB4              | gap junction protein, beta 4, 30.3kDa                                                  | 1.3E-03 | 0.47 |
| 11763314_s_at | 10123             | ARL4C             | ADP-ribosylation factor-like 4C                                                        | 6.6E-03 | 0.47 |
| 11734825_at   | 161742            | SPRED1            | sprouty-related, EVH1 domain containing 1                                              | 1.5E-02 | 0.47 |
| 11720825_s_at | 182               | JAG1              | jagged 1                                                                               | 9.3E-03 | 0.47 |
| 11739046_s_at | 79812             | MMRN2             | multimerin 2                                                                           | 8.1E-03 | 0.47 |
| 11742468_at   | 644943            | RASSF10           | Ras association (RalGDS/AF-6) domain family (N-terminal) member 10                     | 2.2E-06 | 0.47 |
| 11748382_a_at | 64750             | SMURF2            | SMAD specific E3 ubiquitin protein ligase 2                                            | 1.2E-02 | 0.47 |
| 11724686_x_at | 3455              | IFNAR2            | interferon (alpha, beta and omega) receptor 2                                          | 8.4E-04 | 0.47 |

|               |        |           |                                                                                          |         |      |
|---------------|--------|-----------|------------------------------------------------------------------------------------------|---------|------|
| 11731096_at   | 80326  | WNT10A    | wingless-type MMTV integration site family, member 10A                                   | 6.2E-03 | 0.47 |
| 11722654_s_at | 9263   | STK17A    | serine/threonine kinase 17a                                                              | 2.1E-03 | 0.47 |
| 11724551_x_at | 55529  | TMEM55A   | transmembrane protein 55A                                                                | 2.6E-03 | 0.47 |
| 11739654_at   | 8797   | TNFRSF10A | tumor necrosis factor receptor superfamily, member 10a                                   | 9.7E-03 | 0.46 |
| 11720759_s_at | 10625  | IVNS1ABP  | influenza virus NS1A binding protein                                                     | 2.9E-02 | 0.46 |
| 11717656_a_at | 200734 | SPRED2    | sprouty-related, EVH1 domain containing 2                                                | 9.5E-04 | 0.46 |
| 11759497_at   | 50515  | CHST11    | carbohydrate (chondroitin 4) sulfotransferase 11                                         | 1.2E-04 | 0.46 |
| 11722548_at   | 3096   | HIVEP1    | human immunodeficiency virus type I enhancer binding protein 1                           | 2.0E-03 | 0.46 |
| 11727814_at   | 84959  | UBASH3B   | ubiquitin associated and SH3 domain containing B                                         | 8.1E-04 | 0.46 |
| 11754026_a_at | 3576   | IL8       | interleukin 8                                                                            | 5.9E-03 | 0.46 |
| 11723147_a_at | 89795  | NAV3      | neuron navigator 3                                                                       | 1.0E-02 | 0.46 |
| 11748409_a_at | 26030  | PLEKHG3   | pleckstrin homology domain containing, family G (with RhoGef domain) member 3            | 1.6E-03 | 0.45 |
| 11716162_at   | 81606  | LBH       | limb bud and heart development                                                           | 7.1E-03 | 0.45 |
| 11715950_a_at | 115207 | KCTD12    | potassium channel tetramerisation domain containing 12                                   | 1.9E-02 | 0.45 |
| 11717409_at   | 10019  | SH2B3     | SH2B adaptor protein 3                                                                   | 1.6E-02 | 0.45 |
| 11729099_a_at | 3556   | IL1RAP    | interleukin 1 receptor accessory protein                                                 | 6.8E-04 | 0.45 |
| 11725371_s_at | 7422   | VEGFA     | vascular endothelial growth factor A                                                     | 1.2E-02 | 0.44 |
| 11732240_a_at | 84189  | SLITRK6   | SLIT and NTRK-like family, member 6                                                      | 2.9E-03 | 0.44 |
| 11733240_at   | 3656   | IRAK2     | interleukin-1 receptor-associated kinase 2                                               | 6.0E-03 | 0.44 |
| 11743617_at   | 3673   | ITGA2     | integrin, alpha 2 (CD49B, alpha 2 subunit of VLA-2 receptor)                             | 6.0E-03 | 0.44 |
| 11727215_a_at | 3084   | NRG1      | neuregulin 1                                                                             | 1.3E-02 | 0.44 |
| 11756842_x_at | 221468 | TMEM217   | transmembrane protein 217                                                                | 2.2E-04 | 0.44 |
| 11731246_s_at | 56256  | SERTAD4   | SERTA domain containing 4                                                                | 1.8E-03 | 0.44 |
| 11731603_at   | 201799 | TMEM154   | transmembrane protein 154                                                                | 3.9E-04 | 0.44 |
| 11746863_x_at | 79642  | ARSJ      | arylsulfatase family, member J                                                           | 1.5E-04 | 0.44 |
| 11740736_x_at | 79905  | TMC7      | transmembrane channel-like 7                                                             | 7.0E-05 | 0.44 |
| 11732712_a_at | 10468  | FST       | follistatin                                                                              | 3.8E-02 | 0.44 |
| 11718576_s_at | 10276  | NET1      | neuroepithelial cell transforming 1                                                      | 1.5E-04 | 0.44 |
| 11750154_a_at | 5998   | RGS3      | regulator of G-protein signaling 3                                                       | 2.4E-03 | 0.44 |
| 11741056_a_at | 136    | ADORA2B   | adenosine A2b receptor                                                                   | 3.1E-02 | 0.44 |
| 11725372_x_at | 7422   | VEGFA     | vascular endothelial growth factor A                                                     | 1.6E-02 | 0.43 |
| 11753008_a_at | 56300  | IL36G     | interleukin 36, gamma                                                                    | 1.6E-02 | 0.43 |
| 11741964_s_at | 7422   | VEGFA     | vascular endothelial growth factor A                                                     | 2.3E-02 | 0.43 |
| 11731602_at   | 201799 | TMEM154   | transmembrane protein 154                                                                | 2.9E-04 | 0.43 |
| 11749155_a_at | 10276  | NET1      | neuroepithelial cell transforming 1                                                      | 1.0E-04 | 0.43 |
| 11716733_at   | 3659   | IRF1      | interferon regulatory factor 1                                                           | 6.7E-04 | 0.43 |
| 11723591_at   | 84230  | LRRC8C    | leucine rich repeat containing 8 family, member C                                        | 3.8E-03 | 0.43 |
| 11750740_a_at | 8869   | ST3GAL5   | ST3 beta-galactoside alpha-2,3-sialyltransferase 5                                       | 8.3E-03 | 0.43 |
| 11718084_a_at | 4067   | LYN       | v-yes-1 Yamaguchi sarcoma viral related oncogene homolog                                 | 6.0E-04 | 0.42 |
| 11734827_at   | 161742 | SPRED1    | sprouty-related, EVH1 domain containing 1                                                | 1.1E-02 | 0.42 |
| 11726909_at   | 79413  | ZBED2     | zinc finger, BED-type containing 2                                                       | 3.9E-02 | 0.42 |
| 11734824_at   | 161742 | SPRED1    | sprouty-related, EVH1 domain containing 1                                                | 2.4E-02 | 0.42 |
| 11737413_at   | 84953  | MICALCL   | MICAL C-terminal like                                                                    | 3.7E-03 | 0.42 |
| 11736686_a_at | 2250   | FGF5      | fibroblast growth factor 5                                                               | 7.4E-05 | 0.42 |
| 11725367_at   | 389792 | IERSL     | immediate early response 5-like                                                          | 1.2E-04 | 0.42 |
| 11726158_at   | 139886 | SPIN4     | spindlin family, member 4                                                                | 5.1E-03 | 0.42 |
| 11757853_s_at | 117581 | TWIST2    | twist basic helix-loop-helix transcription factor 2                                      | 1.1E-04 | 0.42 |
| 11718295_a_at | 10509  | SEMA4B    | sema domain, immunoglobulin domain (Ig), transmembrane domain (TM) and short cytoplasmic | 4.1E-04 | 0.42 |
| 11732877_a_at | 1591   | CYP24A1   | cytochrome P450, family 24, subfamily A, polypeptide 1                                   | 3.8E-03 | 0.42 |
| 11746931_a_at | 3624   | INHBA     | inhibin, beta A                                                                          | 8.8E-03 | 0.41 |
| 11724032_a_at | 10468  | FST       | follistatin                                                                              | 3.3E-02 | 0.41 |
| 11751739_a_at | 5791   | PTPRE     | protein tyrosine phosphatase, receptor type, E                                           | 1.1E-02 | 0.40 |
| 11725469_at   | 9388   | LIPG      | lipase, endothelial                                                                      | 1.2E-03 | 0.40 |

|               |        |          |                                                                                          |         |      |
|---------------|--------|----------|------------------------------------------------------------------------------------------|---------|------|
| 11736685_a_at | 2250   | FGF5     | fibroblast growth factor 5                                                               | 2.5E-04 | 0.40 |
| 11715951_s_at | 115207 | KCTD12   | potassium channel tetramerisation domain containing 12                                   | 3.2E-02 | 0.40 |
| 11716161_s_at | 81606  | LBH      | limb bud and heart development                                                           | 3.3E-04 | 0.40 |
| 11733852_at   | 112399 | EGLN3    | egl nine homolog 3 (C. elegans)                                                          | 2.4E-02 | 0.40 |
| 11731897_a_at | 5744   | PTHLH    | parathyroid hormone-like hormone                                                         | 2.9E-02 | 0.40 |
| 11725198_at   | 3552   | IL1A     | interleukin 1, alpha                                                                     | 2.2E-02 | 0.40 |
| 11759549_a_at | 9645   | MICAL2   | microtubule associated monooxygenase, calponin and LIM domain containing 2               | 2.3E-03 | 0.39 |
| 11730465_at   | 3759   | KCNJ2    | potassium inwardly-rectifying channel, subfamily J, member 2                             | 1.3E-02 | 0.39 |
| 11718085_s_at | 4067   | LYN      | v-yes-1 Yamaguchi sarcoma viral related oncogene homolog                                 | 1.6E-03 | 0.39 |
| 11752387_a_at | 2113   | ETS1     | v-ets erythroblastosis virus E26 oncogene homolog 1 (avian)                              | 3.8E-02 | 0.39 |
| 11736047_a_at | 118429 | ANTXR2   | anthrax toxin receptor 2                                                                 | 8.7E-03 | 0.39 |
| 11718296_a_at | 10509  | SEMA4B   | sema domain, immunoglobulin domain (Ig), transmembrane domain (TM) and short cytoplasmic | 4.1E-03 | 0.38 |
| 11728141_at   | 387914 | SHISA2   | shisa homolog 2 (Xenopus laevis)                                                         | 2.7E-02 | 0.38 |
| 11754119_a_at | 5328   | PLAU     | plasminogen activator, urokinase                                                         | 3.9E-03 | 0.38 |
| 11720447_s_at | 6662   | SOX9     | SRY (sex determining region Y)-box 9                                                     | 3.4E-03 | 0.38 |
| 11754394_a_at | 8871   | SYNJ2    | synaptojanin 2                                                                           | 3.2E-04 | 0.38 |
| 11732514_s_at | 4067   | LYN      | v-yes-1 Yamaguchi sarcoma viral related oncogene homolog                                 | 7.1E-04 | 0.38 |
| 11726572_a_at | 8482   | SEMA7A   | semaphorin 7A, GPI membrane anchor (John Milton Hagen blood group)                       | 3.8E-05 | 0.38 |
| 11727690_at   | 3589   | IL11     | interleukin 11                                                                           | 2.3E-03 | 0.38 |
| 11759155_a_at | 162514 | TRPV3    | transient receptor potential cation channel, subfamily V, member 3                       | 3.4E-04 | 0.38 |
| 11736687_a_at | 2250   | FGF5     | fibroblast growth factor 5                                                               | 3.4E-04 | 0.38 |
| 11740245_a_at | 5744   | PTHLH    | parathyroid hormone-like hormone                                                         | 3.3E-02 | 0.38 |
| 11725280_a_at | 56978  | PRDM8    | PR domain containing 8                                                                   | 9.0E-03 | 0.38 |
| 11734826_s_at | 161742 | SPRED1   | sprouty-related, EVH1 domain containing 1                                                | 4.2E-03 | 0.38 |
| 11720823_at   | 182    | JAG1     | jagged 1                                                                                 | 1.4E-03 | 0.37 |
| 11736813_at   | 80380  | PDCD1LG2 | programmed cell death 1 ligand 2                                                         | 2.6E-03 | 0.37 |
| 11755648_a_at | 9645   | MICAL2   | microtubule associated monooxygenase, calponin and LIM domain containing 2               | 3.3E-03 | 0.37 |
| 11715947_a_at | 115207 | KCTD12   | potassium channel tetramerisation domain containing 12                                   | 2.3E-04 | 0.37 |
| 11717886_a_at | 5328   | PLAU     | plasminogen activator, urokinase                                                         | 9.6E-03 | 0.37 |
| 11736048_at   | 118429 | ANTXR2   | anthrax toxin receptor 2                                                                 | 4.7E-03 | 0.36 |
| 11751994_s_at | 182    | JAG1     | jagged 1                                                                                 | 2.1E-03 | 0.36 |
| 11738053_x_at | 5329   | PLAUR    | plasminogen activator, urokinase receptor                                                | 7.6E-04 | 0.36 |
| 11719916_at   | 3553   | IL1B     | interleukin 1, beta                                                                      | 1.4E-04 | 0.36 |
| 11759496_at   | 50515  | CHST11   | carbohydrate (chondroitin 4) sulfotransferase 11                                         | 1.9E-03 | 0.36 |
| 11724948_at   | 163732 | CITED4   | Cbp/p300-interacting transactivator, with Glu/Asp-rich carboxy-terminal domain, 4        | 2.9E-04 | 0.36 |
| 11716160_at   | 81606  | LBH      | limb bud and heart development                                                           | 5.6E-05 | 0.35 |
| 11757940_at   | 5228   | PGF      | placental growth factor                                                                  | 2.2E-05 | 0.35 |
| 11754176_a_at | 11009  | IL24     | interleukin 24                                                                           | 1.8E-02 | 0.35 |
| 11744128_x_at | 2920   | CXCL2    | chemokine (C-X-C motif) ligand 2                                                         | 1.0E-02 | 0.35 |
| 11732158_a_at | 9510   | ADAMTS1  | ADAM metalloproteinase with thrombospondin type 1 motif, 1                               | 5.4E-05 | 0.35 |
| 11739767_a_at | 5791   | PTPRE    | protein tyrosine phosphatase, receptor type, E                                           | 4.6E-03 | 0.35 |
| 11744005_at   | 7262   | PHLDA2   | pleckstrin homology-like domain, family A, member 2                                      | 7.5E-05 | 0.35 |
| 11732713_at   | 10468  | FST      | follistatin                                                                              | 4.0E-02 | 0.34 |
| 11760574_x_at | 8061   | FOSL1    | FOS-like antigen 1                                                                       | 3.8E-03 | 0.33 |
| 11743841_at   | 257068 | PLCXD2   | phosphatidylinositol-specific phospholipase C, X domain containing 2                     | 6.5E-04 | 0.33 |
| 11732331_s_at | 10123  | ARL4C    | ADP-ribosylation factor-like 4C                                                          | 1.0E-03 | 0.33 |
| 11754662_s_at | 9510   | ADAMTS1  | ADAM metalloproteinase with thrombospondin type 1 motif, 1                               | 4.3E-04 | 0.33 |
| 11731834_a_at | 11009  | IL24     | interleukin 24                                                                           | 2.9E-02 | 0.33 |
| 11736688_x_at | 2250   | FGF5     | fibroblast growth factor 5                                                               | 7.7E-05 | 0.33 |
| 11751993_a_at | 182    | JAG1     | jagged 1                                                                                 | 9.5E-04 | 0.32 |
| 11721306_at   | 22822  | PHLDA1   | pleckstrin homology-like domain, family A, member 1                                      | 1.9E-03 | 0.31 |

|               |        |         |                                                                                       |         |      |
|---------------|--------|---------|---------------------------------------------------------------------------------------|---------|------|
| 11736247_x_at | 347902 | AMIGO2  | adhesion molecule with Ig-like domain 2                                               | 6.9E-04 | 0.30 |
| 11717154_a_at | 5328   | PLAU    | plasminogen activator, urokinase                                                      | 3.3E-03 | 0.30 |
| 11754313_s_at | 10123  | ARL4C   | ADP-ribosylation factor-like 4C                                                       | 1.0E-03 | 0.29 |
| 11758216_s_at | 6662   | SOX9    | SRY (sex determining region Y)-box 9                                                  | 3.4E-04 | 0.29 |
| 11732181_x_at | 5724   | PTAFR   | platelet-activating factor receptor                                                   | 5.2E-06 | 0.29 |
| 11736246_a_at | 347902 | AMIGO2  | adhesion molecule with Ig-like domain 2                                               | 3.7E-04 | 0.29 |
| 11755252_a_at | 347902 | AMIGO2  | adhesion molecule with Ig-like domain 2                                               | 1.1E-03 | 0.29 |
| 11718841_s_at | 3576   | IL8     | interleukin 8                                                                         | 3.6E-03 | 0.28 |
| 11733913_at   | 9957   | HS3ST1  | heparan sulfate (glucosamine) 3-O-sulfotransferase 1                                  | 3.6E-03 | 0.28 |
| 11737334_a_at | 347902 | AMIGO2  | adhesion molecule with Ig-like domain 2                                               | 4.6E-04 | 0.27 |
| 11752515_a_at | 4953   | ODC1    | ornithine decarboxylase 1                                                             | 5.6E-03 | 0.27 |
| 11719586_a_at | 29114  | TAGLN3  | transgelin 3                                                                          | 1.5E-04 | 0.27 |
| 11724036_a_at | 5743   | PTGS2   | prostaglandin-endoperoxide synthase 2 (prostaglandin G/H synthase and cyclooxygenase) | 2.9E-02 | 0.27 |
| 11730029_a_at | 144455 | E2F7    | E2F transcription factor 7                                                            | 4.6E-03 | 0.26 |
| 11754074_s_at | 50486  | G0S2    | G0/G1switch 2                                                                         | 5.2E-03 | 0.26 |
| 11724478_s_at | 8061   | FOSL1   | FOS-like antigen 1                                                                    | 9.7E-03 | 0.26 |
| 11758222_s_at | 6574   | SLC20A1 | solute carrier family 20 (phosphate transporter), member 1                            | 1.5E-03 | 0.25 |
| 11720448_at   | 6662   | SOX9    | SRY (sex determining region Y)-box 9                                                  | 1.3E-05 | 0.25 |
| 11720062_s_at | 8870   | IER3    | immediate early response 3                                                            | 2.6E-04 | 0.24 |
| 11731496_at   | 3624   | INHBA   | inhibin, beta A                                                                       | 2.3E-03 | 0.24 |
| 11736342_at   | 1960   | EGR3    | early growth response 3                                                               | 6.5E-05 | 0.24 |
| 11719366_s_at | 2919   | CXCL1   | chemokine (C-X-C motif) ligand 1 (melanoma growth stimulating activity, alpha)        | 4.2E-03 | 0.23 |
| 11764263_s_at | 162514 | TRPV3   | transient receptor potential cation channel, subfamily V, member 3                    | 7.2E-04 | 0.23 |
| 11744162_a_at | 1846   | DUSP4   | dual specificity phosphatase 4                                                        | 7.0E-04 | 0.21 |
| 11744618_a_at | 1848   | DUSP6   | dual specificity phosphatase 6                                                        | 1.9E-02 | 0.20 |
| 11721308_at   | 22822  | PHLDA1  | pleckstrin homology-like domain, family A, member 1                                   | 1.8E-04 | 0.19 |
| 11722049_a_at | 1848   | DUSP6   | dual specificity phosphatase 6                                                        | 1.6E-02 | 0.19 |
| 11755981_a_at | 1839   | HBEGF   | heparin-binding EGF-like growth factor                                                | 5.0E-06 | 0.17 |
| 11741980_a_at | 1848   | DUSP6   | dual specificity phosphatase 6                                                        | 1.7E-02 | 0.16 |
| 11744435_a_at | 1848   | DUSP6   | dual specificity phosphatase 6                                                        | 1.9E-02 | 0.16 |
| 11721305_a_at | 22822  | PHLDA1  | pleckstrin homology-like domain, family A, member 1                                   | 3.9E-04 | 0.14 |
| 11719898_s_at | 1839   | HBEGF   | heparin-binding EGF-like growth factor                                                | 1.2E-04 | 0.14 |
| 11725584_at   | 3038   | HAS3    | hyaluronan synthase 3                                                                 | 2.0E-05 | 0.13 |
| 11744219_at   | 50486  | G0S2    | G0/G1switch 2                                                                         | 4.7E-03 | 0.12 |
| 11721307_at   | 22822  | PHLDA1  | pleckstrin homology-like domain, family A, member 1                                   | 2.0E-04 | 0.10 |

Human bronchial epithelial cells were either not treated or treated with 0.1  $\mu$ M budesonide (Bud) prior to harvesting at 6 h. Total RNA was subjected to expression profiling using Affymetrix PrimeView microarrays. Analysis (n = 6 independent donors) was performed with Partek Genomics Suite (Version 6.6). Resultant fold expression and *P* values for all probe sets showing fold  $\geq 2$  or  $\leq 0.5$  with  $P \leq 0.05$  are listed.

SUPPLEMENTAL TABLE 10

Primary human bronchial epithelial cell microarray data: Functional grouping of genes showing  $\geq 2$  or  $\leq 0.5$  fold change ( $P \leq 0.05$ ) following 6h *in vitro* budesonide treatment

|                                                       |                                                                                                                                                                                                                                                                                                    |
|-------------------------------------------------------|----------------------------------------------------------------------------------------------------------------------------------------------------------------------------------------------------------------------------------------------------------------------------------------------------|
| <b>A. Up-regulated genes (&gt;2 fold)</b>             |                                                                                                                                                                                                                                                                                                    |
| <b>A1. Transcriptional control</b>                    |                                                                                                                                                                                                                                                                                                    |
| <i>Positive regulator - DNA binding</i>               |                                                                                                                                                                                                                                                                                                    |
| $\geq 2$                                              | <u>CEBPD</u> , <u>CUX2</u> , <u>FOXQ1</u> , <u>KLF9</u> , <u>LHX6</u> , <u>MYCL1</u> , <u>PER1</u> , <u>TFCP2L1</u> , <u>TRNP1</u>                                                                                                                                                                 |
| <i>Negative regulator – DNA binding</i>               |                                                                                                                                                                                                                                                                                                    |
| $\geq 2$                                              | <u>BCL6</u> , <u>TSC22D3</u> , <u>ZBTB16</u>                                                                                                                                                                                                                                                       |
| <i>Other regulator</i>                                |                                                                                                                                                                                                                                                                                                    |
| $\geq 2$                                              | <u>HGMB3</u>                                                                                                                                                                                                                                                                                       |
| <b>A2. Membrane receptors</b>                         |                                                                                                                                                                                                                                                                                                    |
| <i>GPCRs</i>                                          |                                                                                                                                                                                                                                                                                                    |
| $\geq 2$                                              | <u>FZD2</u> , <u>LGR4</u>                                                                                                                                                                                                                                                                          |
| <i>Cytokine, growth factor, and related receptors</i> |                                                                                                                                                                                                                                                                                                    |
| $\geq 2$                                              | <u>GHR</u> , <u>KDR</u> , <u>MERTK</u> , <u>TLR2</u>                                                                                                                                                                                                                                               |
| <i>Other membrane receptors</i>                       |                                                                                                                                                                                                                                                                                                    |
| $\geq 2$                                              | <u>CD86</u> , <u>FLRT3</u> , <u>SEMA6A</u> , <u>TREM2</u>                                                                                                                                                                                                                                          |
| <b>A3. Signaling and regulation of signaling</b>      |                                                                                                                                                                                                                                                                                                    |
| <i>Kinase</i>                                         |                                                                                                                                                                                                                                                                                                    |
| $\geq 2$                                              | <u>HIPK2</u> , <u>IRAK3</u> ,                                                                                                                                                                                                                                                                      |
| <i>Phosphatase</i>                                    |                                                                                                                                                                                                                                                                                                    |
| $\geq 2$                                              | <u>DUSP1</u> , <u>PHACTR3</u>                                                                                                                                                                                                                                                                      |
| <i>GTPase, GEF and GAP</i>                            |                                                                                                                                                                                                                                                                                                    |
| $\geq 2$                                              | <u>ARHGEF26</u> , <u>ARL4A</u> , <u>ERRFI1</u> , <u>FAM13A</u> , <u>GPSM2</u> , <u>RASL11B</u> , <u>RGS2</u> , <u>SRGAP3</u>                                                                                                                                                                       |
| <i>Secreted factors (cytokines, growth factors)</i>   |                                                                                                                                                                                                                                                                                                    |
| $\geq 2$                                              | <u>C10orf99</u> , <u>CXCL14</u> , <u>INHBB</u> , <u>VSTM2L</u>                                                                                                                                                                                                                                     |
| <i>Other signaling</i>                                |                                                                                                                                                                                                                                                                                                    |
| $\geq 2$                                              | <u>BIRC3</u> , <u>DNER</u> , <u>EPS8</u> , <u>FAT4</u> , <u>FBXL16</u> , <u>FKBP5</u> , <u>GADD45B</u> , <u>GAS1</u> , <u>IRS2</u> , <u>PDE4DIP</u> , <u>PID1</u> , <u>PIK3R1</u> , <u>TMTC1</u>                                                                                                   |
| <b>A4. Metabolic and metabolism</b>                   |                                                                                                                                                                                                                                                                                                    |
| $\geq 2$                                              | <u>ALOX15B</u> , <u>CHST9</u> , <u>CTSC</u> , <u>DCN</u> , <u>GCLC</u> , <u>GCNT1</u> , <u>GLUL</u> , <u>LOX</u> , <u>MAOA</u> , <u>MTHFD2L</u> , <u>PDK4</u> , <u>SEC14L2</u> , <u>SLC16A12</u> , <u>SLC26A2</u> , <u>SLC38A4</u> , <u>SLC46A3</u> , <u>SLC7A2</u> , <u>SULT1E1</u> , <u>TLL1</u> |
| <b>A5. Other function</b>                             |                                                                                                                                                                                                                                                                                                    |
| $\geq 2$                                              | <u>MYOT</u> , <u>NAV2</u> , <u>SCNN1G</u> , <u>SERPINE1</u> , <u>SSBP2</u>                                                                                                                                                                                                                         |
| <b>A6. Function not assigned</b>                      |                                                                                                                                                                                                                                                                                                    |
| $\geq 2$                                              | <u>C11orf96</u> , <u>CTTNBP2</u> , <u>FAM134B</u> , <u>FAM46B</u> , <u>KIAA1211L</u> , <u>TRIM35</u> , <u>ZNF608</u> , <u>ZXDB</u>                                                                                                                                                                 |
| <b>B. Down-regulated genes (&lt;0.5 fold)</b>         |                                                                                                                                                                                                                                                                                                    |
| <b>B1. Transcriptional control</b>                    |                                                                                                                                                                                                                                                                                                    |
| <i>Positive regulator - DNA binding</i>               |                                                                                                                                                                                                                                                                                                    |
| $\geq 2$                                              | <u>E2F7</u> , <u>EGR3</u> , <u>ETS1</u> , <u>FOSL1</u> , <u>IRF1</u> , <u>LBH</u> , <u>POU3F1</u> , <u>SOX9</u>                                                                                                                                                                                    |
| <i>Negative regulator – DNA binding</i>               |                                                                                                                                                                                                                                                                                                    |
| $\geq 2$                                              | <u>HEY1</u> , <u>HIVEP1</u> , <u>TWIST2</u>                                                                                                                                                                                                                                                        |
| <i>Other regulator</i>                                |                                                                                                                                                                                                                                                                                                    |
| $\geq 2$                                              | <u>CITED4</u> , <u>PRDM8</u>                                                                                                                                                                                                                                                                       |
| <b>B2. Membrane receptors</b>                         |                                                                                                                                                                                                                                                                                                    |
| <i>GPCRs</i>                                          |                                                                                                                                                                                                                                                                                                    |
| $\geq 2$                                              | <u>ADORA2B</u> , <u>GPR39</u> , <u>HRH1</u> , <u>PTAFR</u>                                                                                                                                                                                                                                         |
| <i>Cytokine, growth factor, and related receptors</i> |                                                                                                                                                                                                                                                                                                    |
| $\geq 2$                                              | <u>IFNAR2</u> , <u>IL1RAP</u> , <u>SLITRK6</u> , <u>TNFRSF10A</u>                                                                                                                                                                                                                                  |
| <i>Other membrane receptors</i>                       |                                                                                                                                                                                                                                                                                                    |
| $\geq 2$                                              | <u>ANTXR2</u> , <u>ITGA2</u> , <u>NRG1</u>                                                                                                                                                                                                                                                         |
| <b>B3. Signaling and regulation of signaling</b>      |                                                                                                                                                                                                                                                                                                    |
| <i>Kinase</i>                                         |                                                                                                                                                                                                                                                                                                    |
| $\geq 2$                                              | <u>IRAK2</u> , <u>LYN</u> , <u>STK17A</u>                                                                                                                                                                                                                                                          |



|                                                     |                                                                                                                                                                                                                                                                      |
|-----------------------------------------------------|----------------------------------------------------------------------------------------------------------------------------------------------------------------------------------------------------------------------------------------------------------------------|
| <b>Phosphatase</b>                                  |                                                                                                                                                                                                                                                                      |
| ≥2                                                  | DUSP4, DUSP6, PTPRE, UBASH3B                                                                                                                                                                                                                                         |
| <b>GTPase, GEF and GAP</b>                          |                                                                                                                                                                                                                                                                      |
| ≥2                                                  | ARL4C, NET1, PLEKHG3, RGS3                                                                                                                                                                                                                                           |
| <b>Secreted factors (cytokines, growth factors)</b> |                                                                                                                                                                                                                                                                      |
| ≥2                                                  | AREG, CXCL1, CXCL2, FGF5, FST, HBEGF, IL11, IL1A, IL1B, IL24, IL36G, IL8, INHBA, PGF, PTHLH, SEMA3A, VEGFA, WNT10A, WNT7A                                                                                                                                            |
| <b>Other signaling</b>                              |                                                                                                                                                                                                                                                                      |
| ≥2                                                  | AMIGO2, BCL10, EGLN3, ENC1, IER3, IVNS1ABP, JAG1, KCNJ15, KCNJ2, KCTD12, LRRC8C, MICAL2, MICALCL, PDCD1LG2, PHLDA1, PHLDA2, PLAUR, PMEPA1, RASSF10, SEMA4B, SEMA7A, SERTAD4, SH2B3, SHISA2, SLFN5, SMURF2, SPRED1, SPRED2, SPRY2, SPRY4, TMC7, TNFAIP3, TRPV3, VSNL1 |
| <b>B4. Metabolic and metabolism</b>                 |                                                                                                                                                                                                                                                                      |
| ≥2                                                  | ADAMTS1, ARSJ, CHST11, CYP24A1, G0S2, HAS3, LIPG, ODC1, PLAU, PLCXD2, PTGS2, SLC20A1, ST3GAL5, SYNJ2, TMEM55A                                                                                                                                                        |
| <b>B5. Other function</b>                           |                                                                                                                                                                                                                                                                      |
| ≥2                                                  | GJB4, HS3ST1, MMRN2, NAV3                                                                                                                                                                                                                                            |
| <b>B6. Function not assigned</b>                    |                                                                                                                                                                                                                                                                      |
| ≥2                                                  | IER5L, SPIN4, TAGLN3, TMEM154, TMEM217, ZBED2, ZNF697                                                                                                                                                                                                                |

HBE cells were either not treated or treated with 0.1  $\mu$ M budesonide (Bud) prior to harvesting at 6 h. Total RNA was subjected to expression profiling using Affymetrix PrimeView microarrays. Analysis (n = 6 independent donors) was performed with Partek Genomics Suite (Version 6.6). Resultant fold expression and *P* values for all probe sets showing  $\geq 2$  or  $\leq 0.5$  fold ( $P \leq 0.05$ ) were analyzed using the DAVID gene ID conversion tool to produce individual gene identities. Using gene ontology (GO) information and functional information from NCBI Gene, gene symbols were categorized into six general groups: 1, Transcriptional control; 2, Membrane receptors; 3, Signaling and regulation of signaling; 4, Metabolic and metabolism; 5, Other function; or 6, Function not assigned and further sub-divided as indicated. Genes subjected to qPCR validation are underlined.

## Supplemental Figures

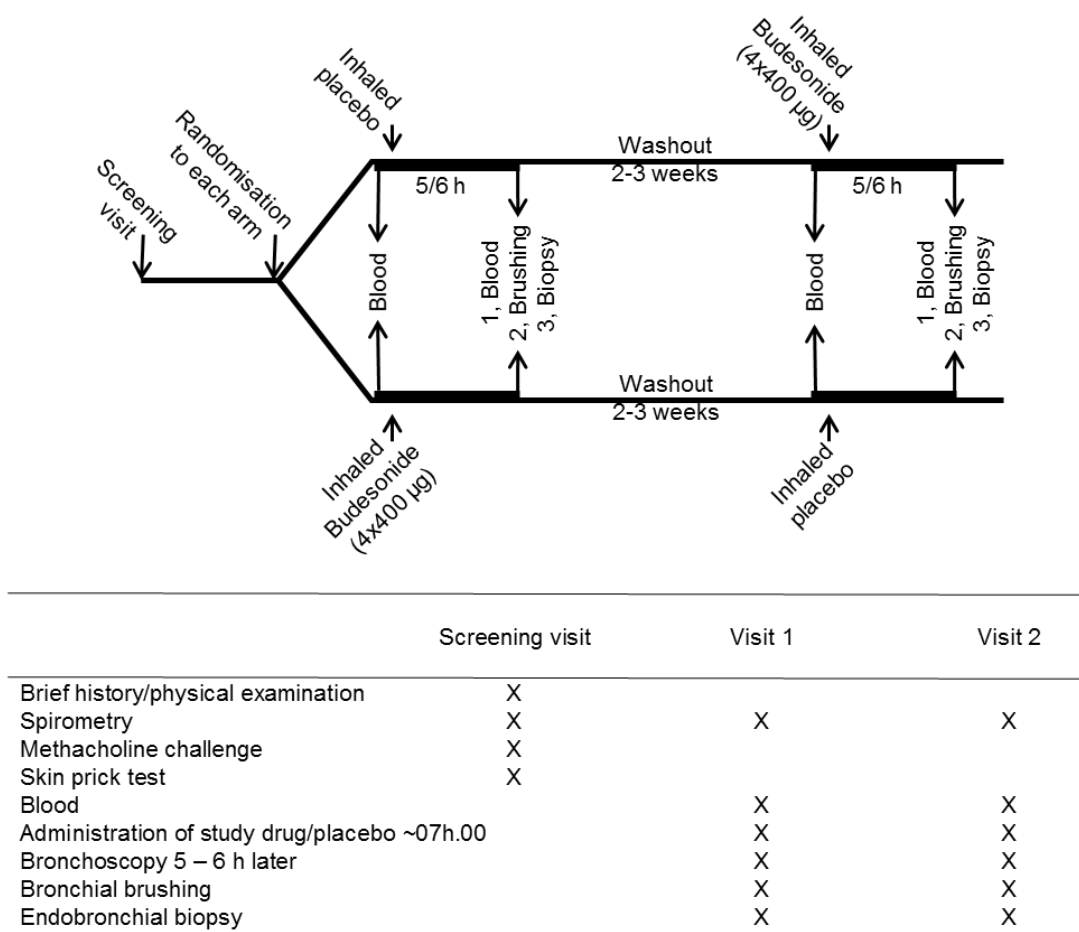

**Supplemental Fig. 1.** Study design: overview and procedures conducted at each visit. Following screening, the study participants were each randomized to receive either inhaled placebo followed by inhaled budesonide, or inhaled budesonide followed by inhaled placebo. Each treatment intervention was separated by a 2–3 week washout period. Randomization was performed by research pharmacy personnel, not otherwise associated with the study.

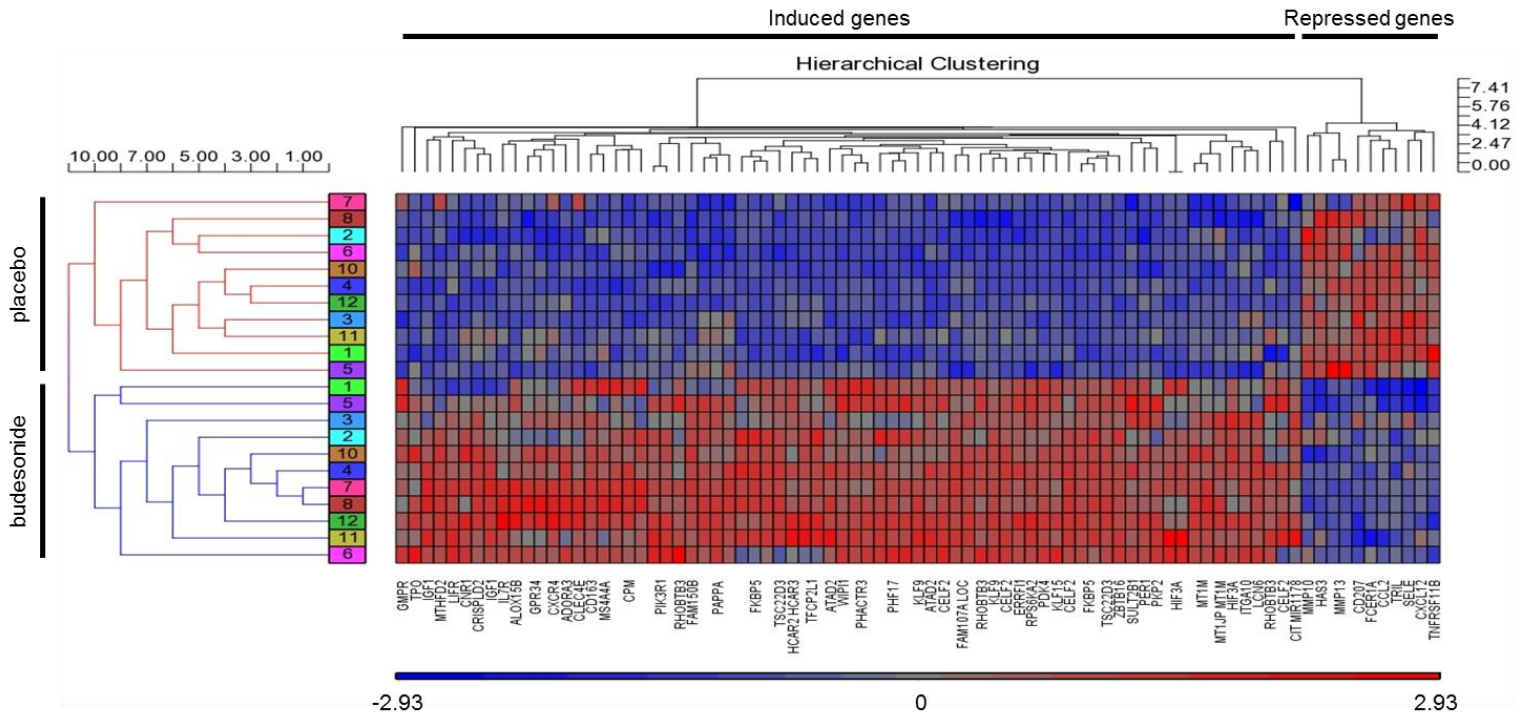

**Supplemental Fig. 2.** Heat map of budesonide-modulated genes showing  $\geq 2$  or  $\leq 0.5$  fold change with 5% false discovery rate (FDR). Biopsy RNA was subjected to expression profiling using Affymetrix PrimeView microarrays. Analysis ( $n = 11$  individuals) was performed with Partek Genomics Suite (v6.6). Probe sets with fold  $\geq 2$  or  $\leq 0.5$  fold change and FDR corrected  $P$  values of  $\leq 0.05$  are portrayed as a heat map. The visualisation was generated by standardizing the selected probes to a mean of 0 and a standard deviation of 1 followed by hierarchical clustering.

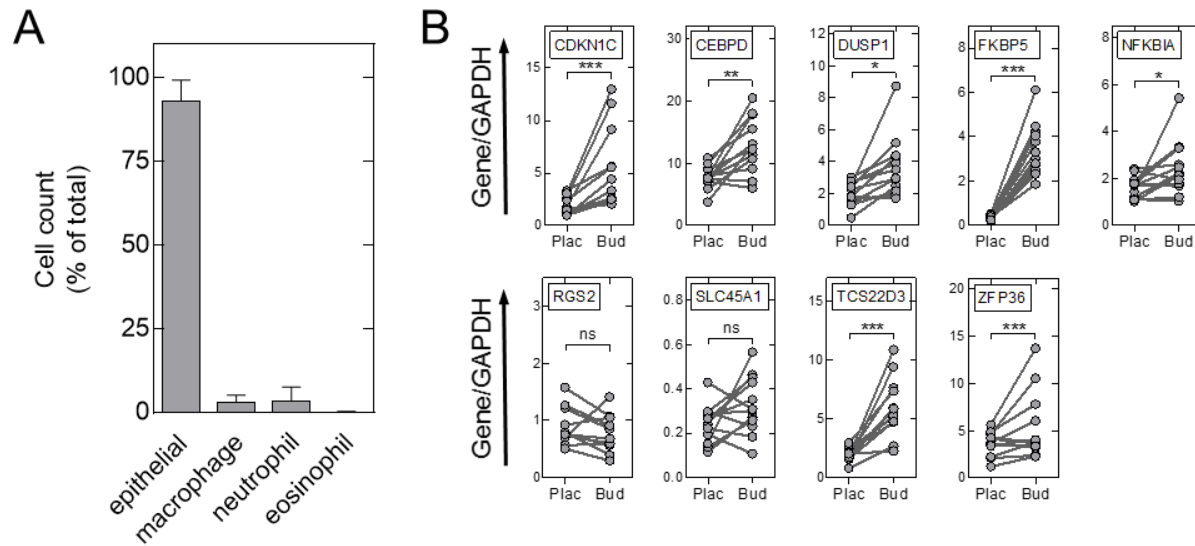

**Supplemental Fig. 3.** Differential cell counts and gene expression in bronchial brushings. (A) Recovered cells were collected into PBS prior to cytopspinning onto slides and differential cell counting. Data on brushed cells from 4 individuals are plotted as percentages of the total cells counted. Data are presented as means  $\pm$ SE. (B) RNA was extracted from the recovered cells and following cDNA synthesis, qPCR for the indicated genes and GAPDH was performed. Data from the 12 individuals are expressed as the gene of interest/GAPDH and are plotted (in arbitrary units) as means  $\pm$ SE. Significance was assessed by Wilcoxon signed rank test. \*  $P \leq 0.05$ , \*\*  $P \leq 0.01$ , \*\*\*  $P \leq 0.001$ .

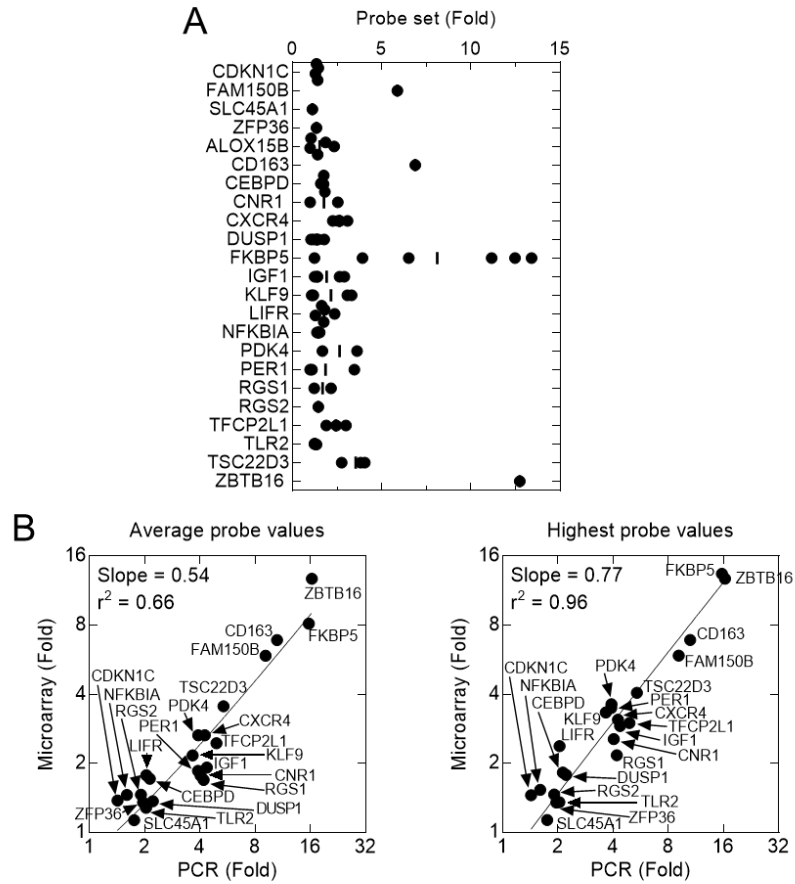

**Supplemental Fig. 4.** Comparison of biopsy microarray data with qPCR analysis of budesonide-induced genes. (A) Of the genes analyzed by qPCR in Figs. 1-3 in the main paper, many corresponded to multiple microarray probe sets (Supplemental Table 5). The values for each of these probe sets are plotted as fold for each gene. (B) Left panel - The average fold for all probe sets for each gene (y axis) is plotted against the fold obtained by qPCR (x axis). Right panel - Probe sets with the maximum fold for each gene (y axis) are plotted against the fold obtained by PCR (x axis). Slope and  $r^2$  values are provided.

**Supplemental Fig. 5.** Pathway analysis showing selected pathways from the top 10 pathways most significantly associated with the microarray data. Color key shows log fold.

**A. Aldosterone-regulated sodium reabsorption**

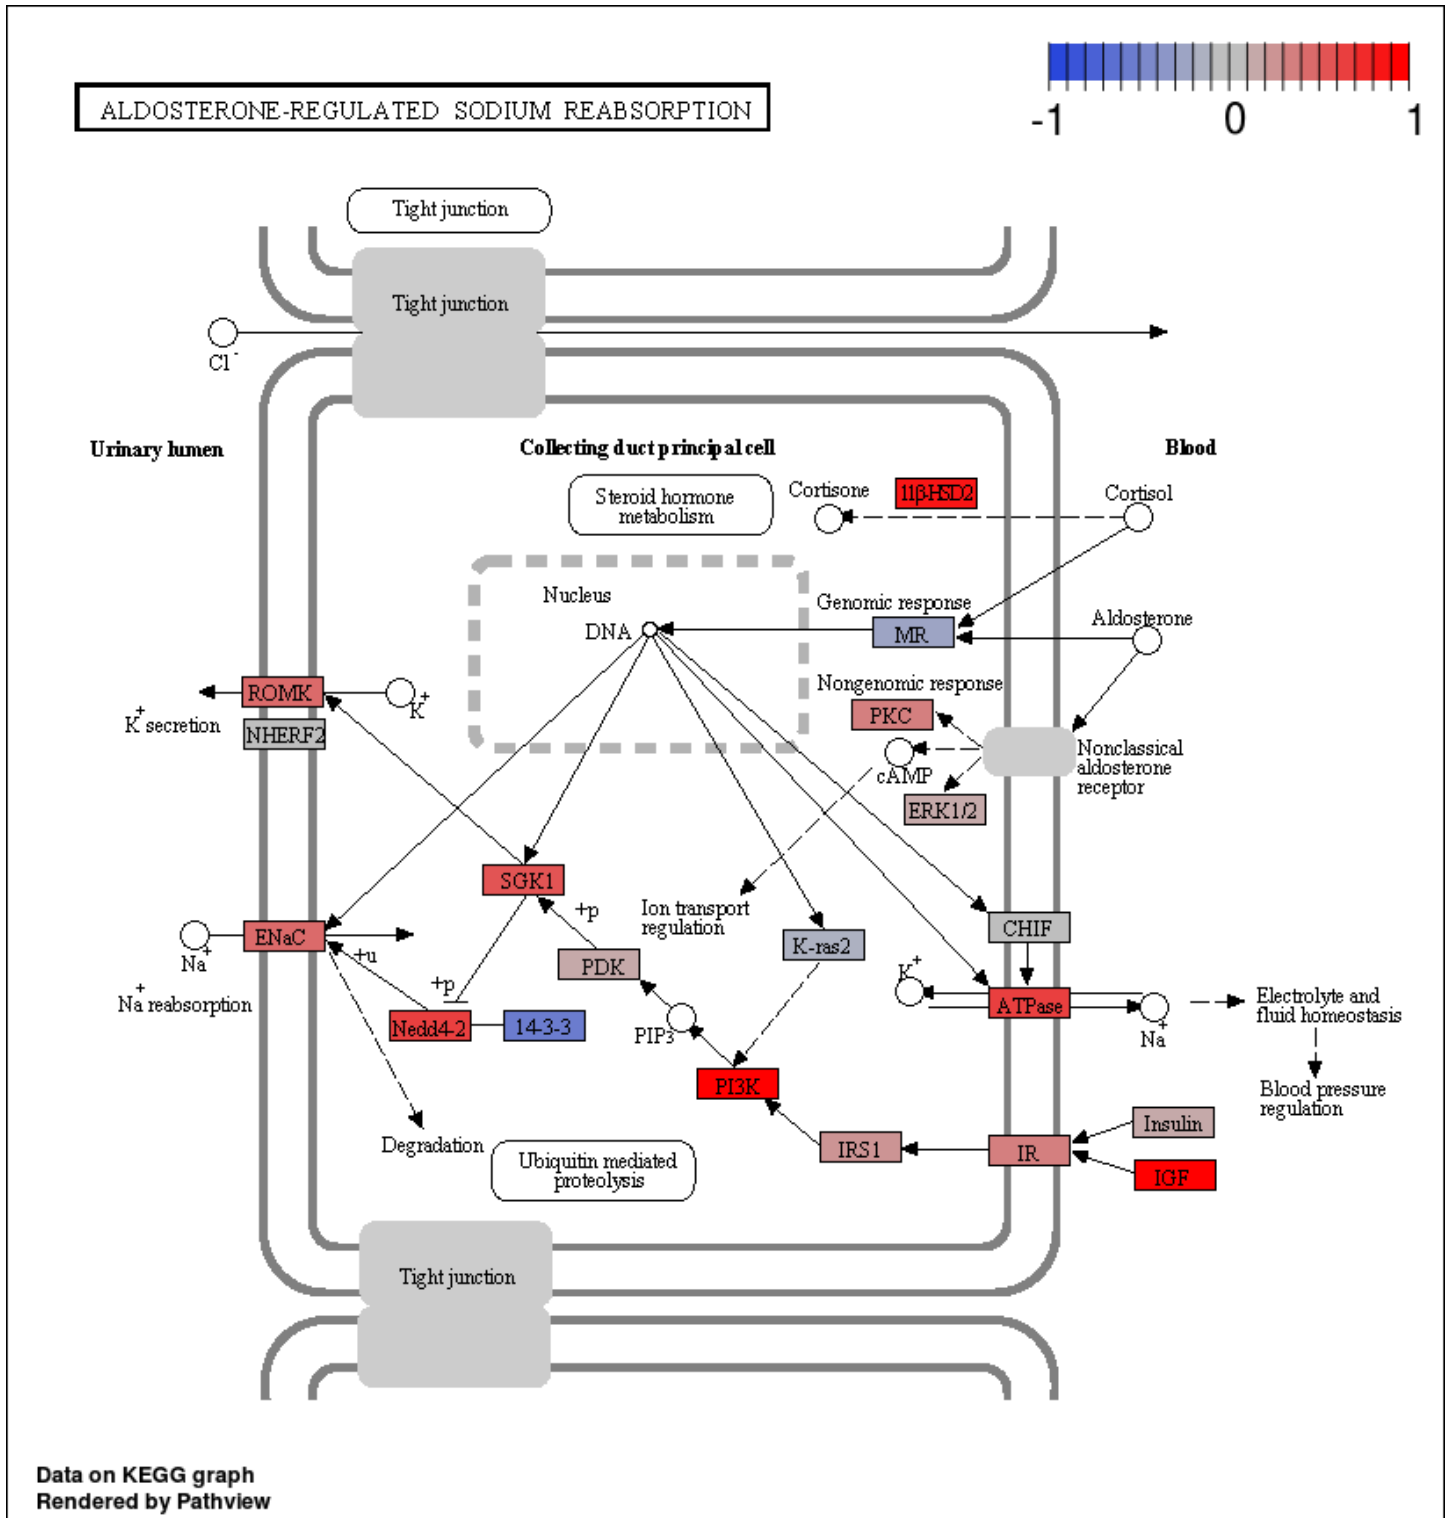

## B. Adipocytokine signaling pathway

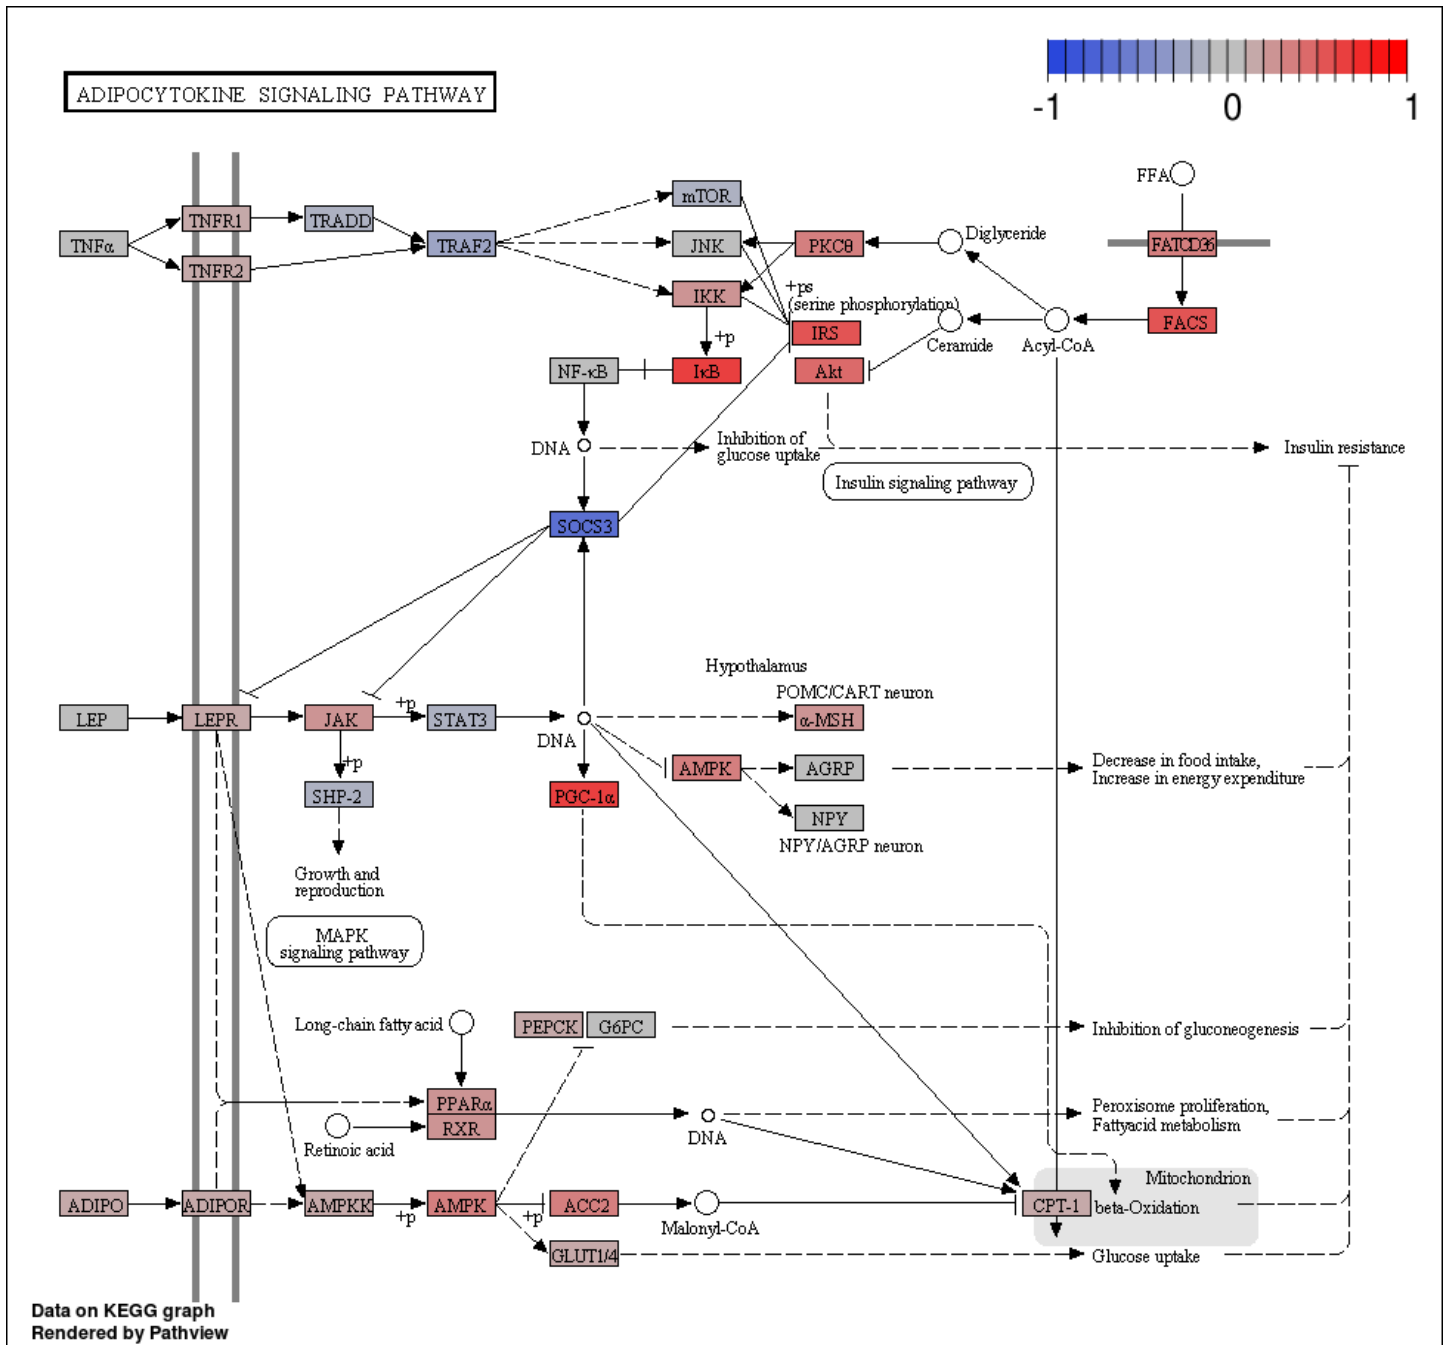

### C. Hematopoietic cell lineage

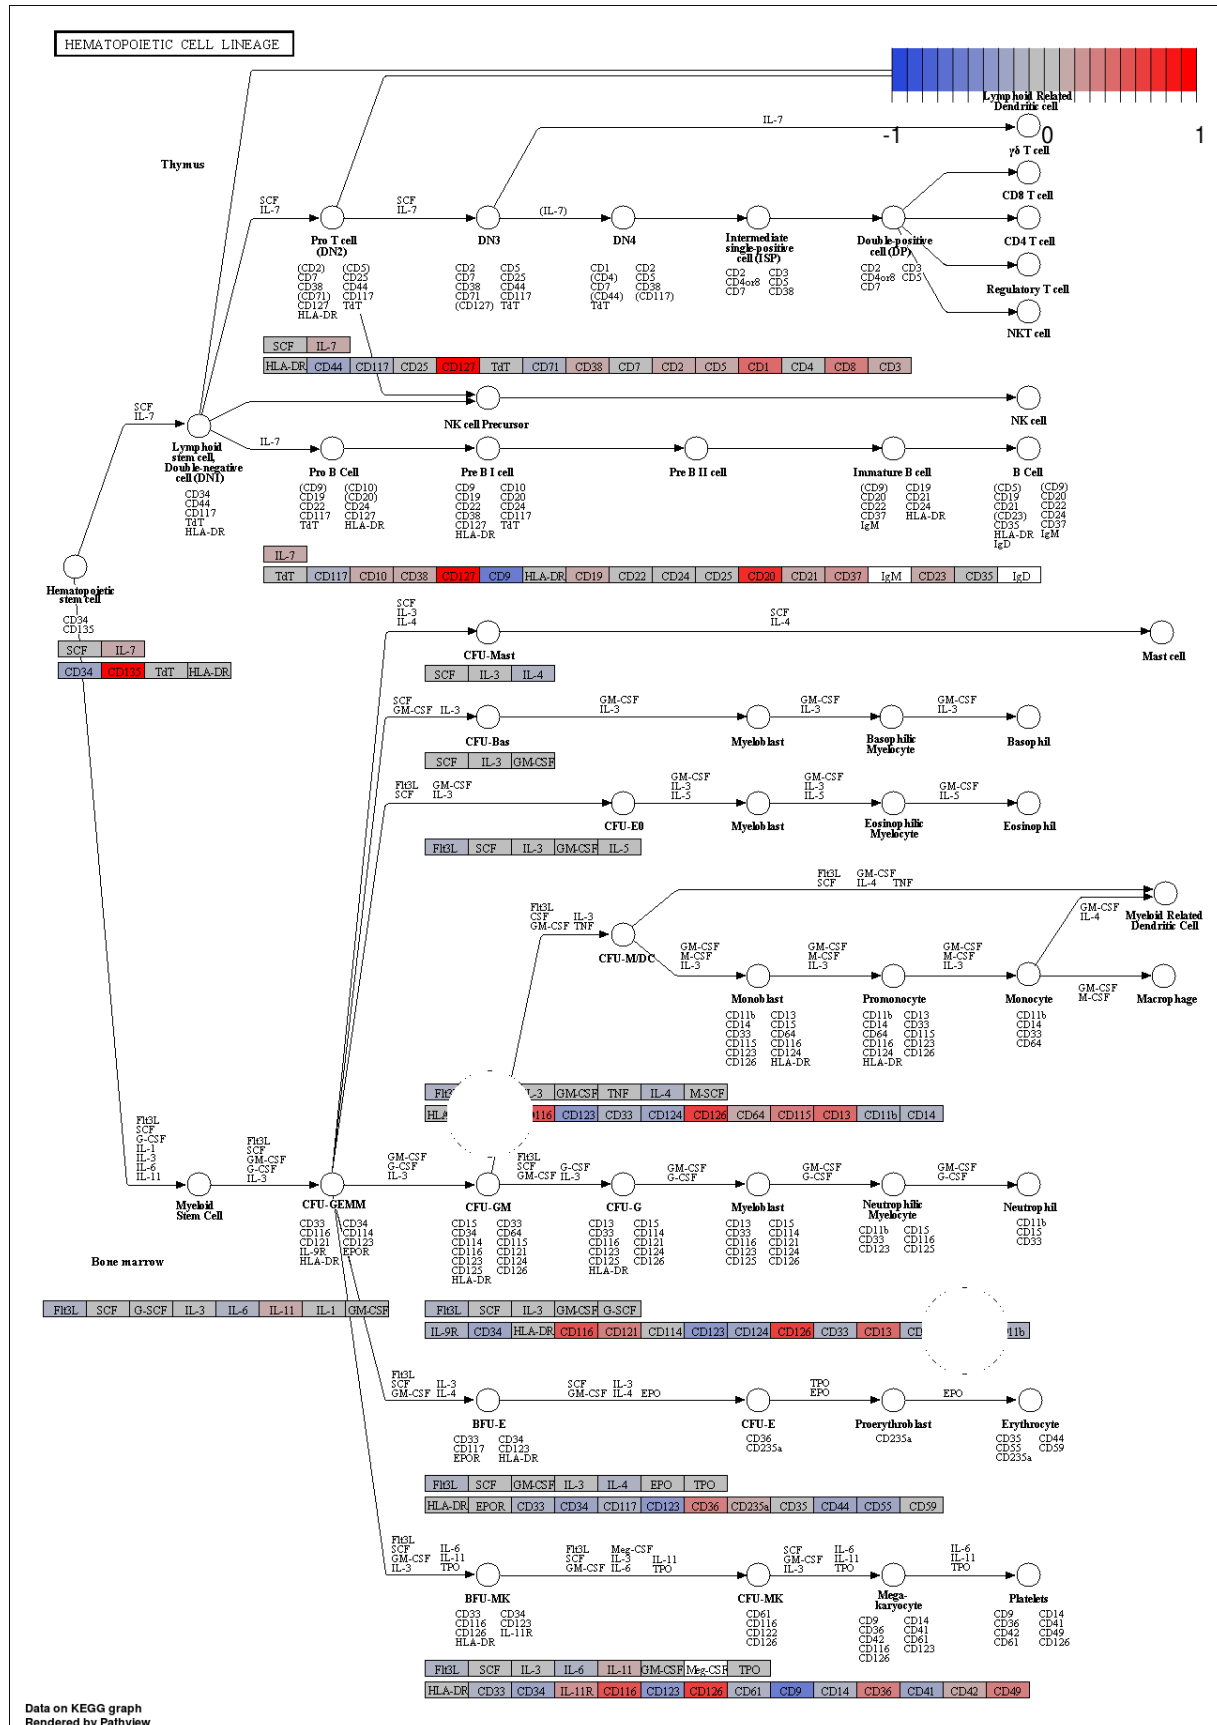





# E. Circadian rhythm

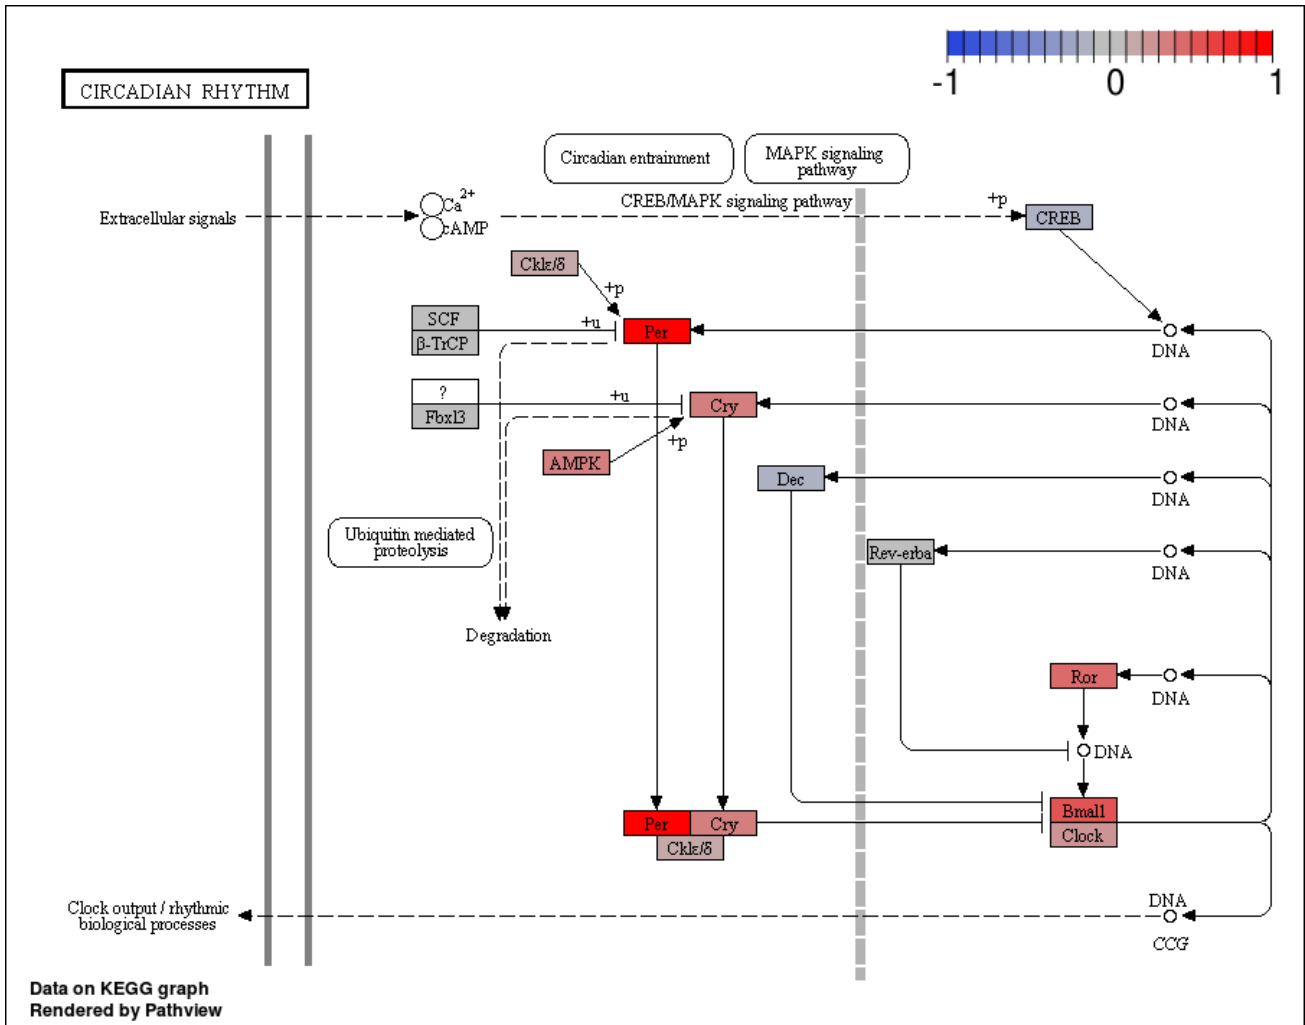

# F. Insulin signaling pathway

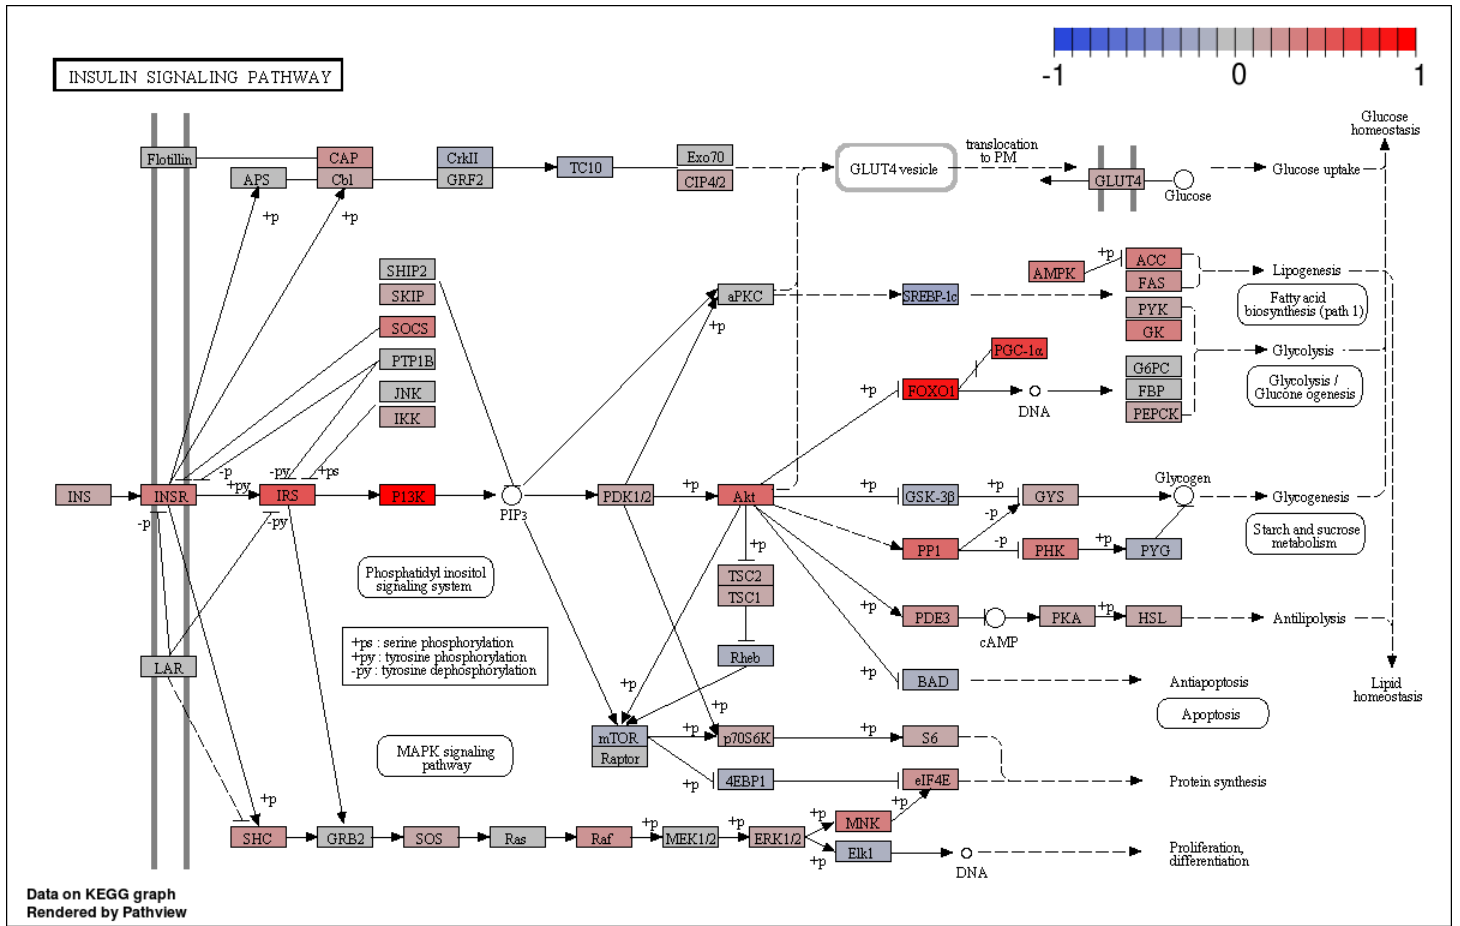

# G. mTOR signaling pathway

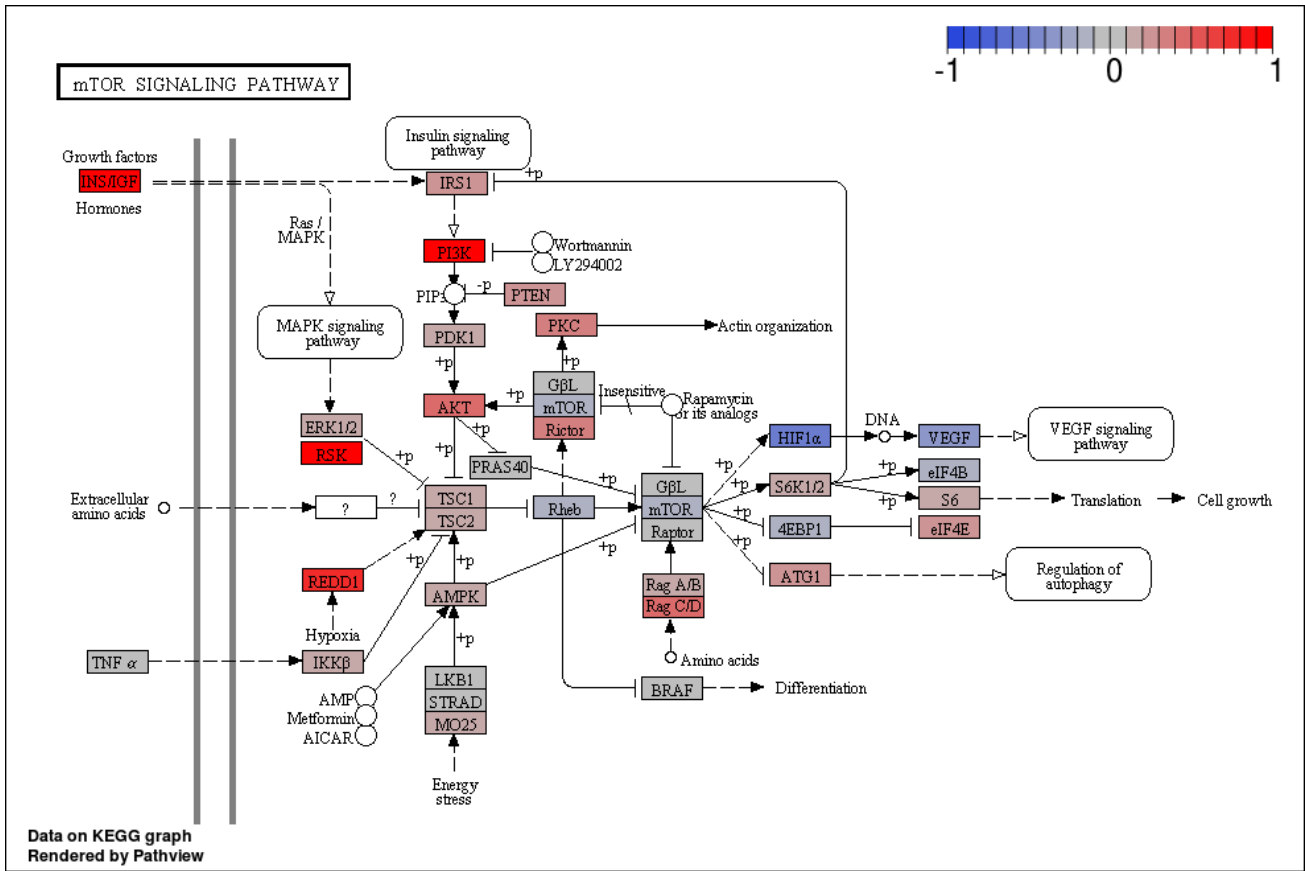

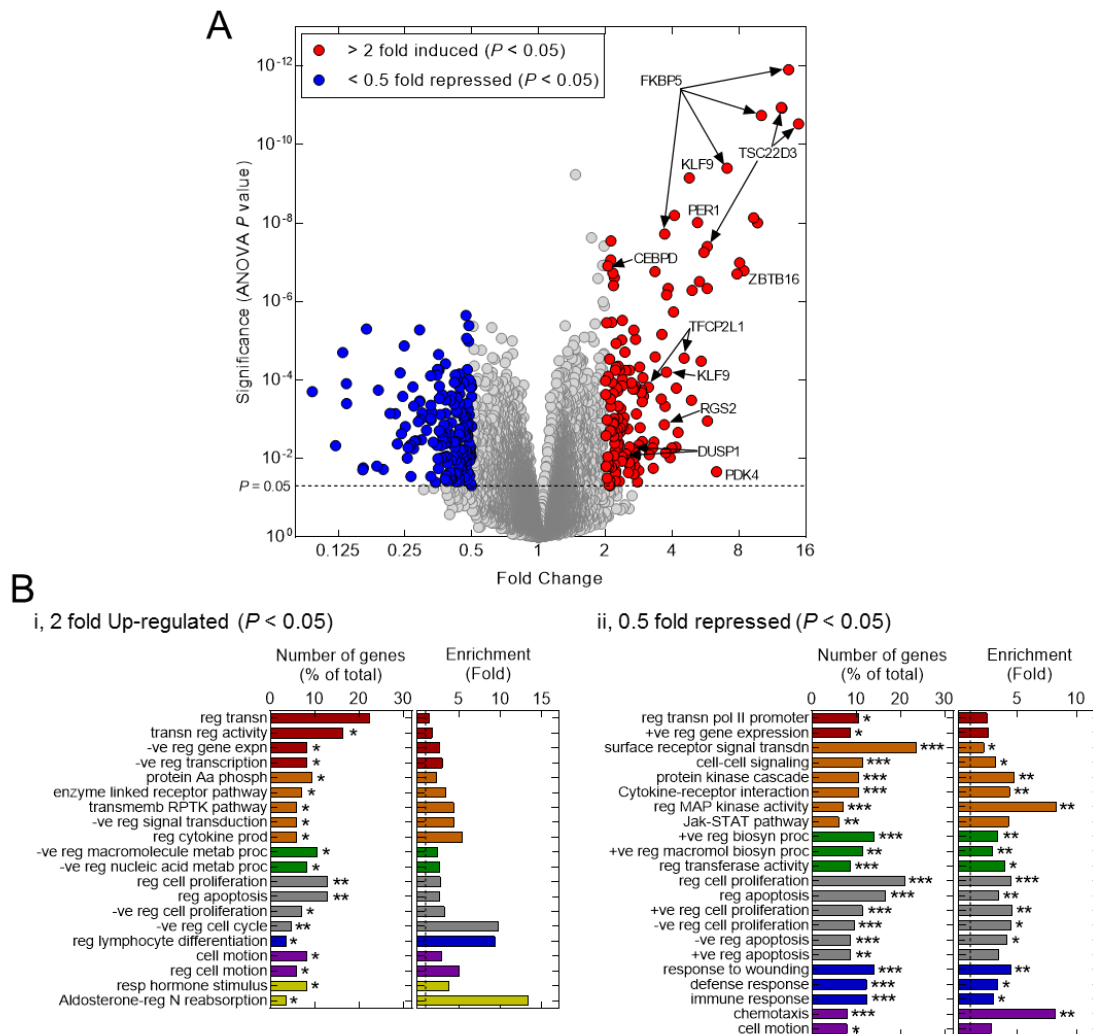

**Supplemental Fig. 6.** Microarray and gene ontology analysis of primary human bronchial epithelial cells treated with budesonide. (A) Microarray analysis of primary HBE cells. Primary HBE cells, grown from 6 of the 12 individuals recruited into the main study and who had not received budesonide inhalation, were not treated or treated with budesonide ( $0.1 \mu\text{M}$ ). RNA was prepared and microarray analysis performed using Affymetrix Primeview arrays. Analysis was performed with Partek Genomics Suite (v6.6) using robust multi-array averaging (RMA) and resultant fold expression and  $P$  values used to generate a volcano plot (Supplemental Fig. 2). (B) GO analysis of biological process. Budesonide-induced and -repressed probe sets meeting the criteria; i,  $\geq 2$  fold,  $P \leq 0.05$ , or ii,  $\leq 0.5$  fold,  $P \leq 0.05$  were analyzed using the DAVID gene ID conversion tool to give: i, 84 up-regulated and ii, 114 down-regulated genes, respectively (Supplemental Table 10). Each gene list was analyzed by DAVID functional annotation, which produced gene clusters ( $\geq 2$  genes/cluster) corresponding to 99 and 194 GO annotation terms respectively. GO terms corresponding to biological process (GOTERM\_BP\_FAT and KEGG\_PATHWAY) were extracted. Selected terms are plotted with the numbers of genes (as a percentage of total) for each term along with the fold enrichment for each term. Abbreviations are as used in Figure 2 of the main manuscript.
